# Supplementary material for: Glucocorticoid Receptor-Regulated Enhancers Play a Central Role in the Gene Regulatory Networks Underlying Drug Addiction
Source: PubMed Central journal article supplement (PMC9149415; doi:10.3389/fnins.2022.858427), 2022-05-16

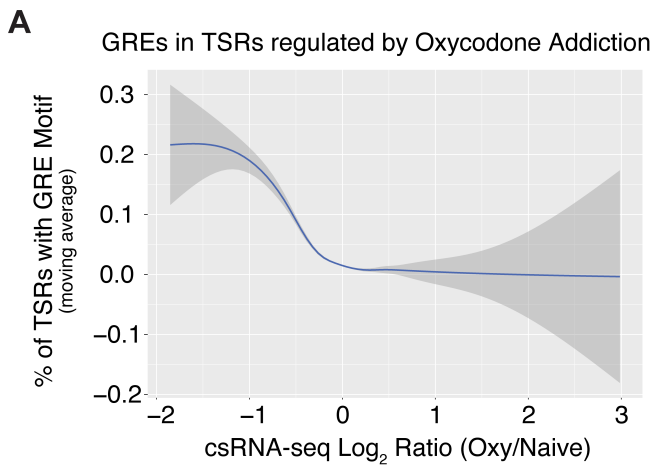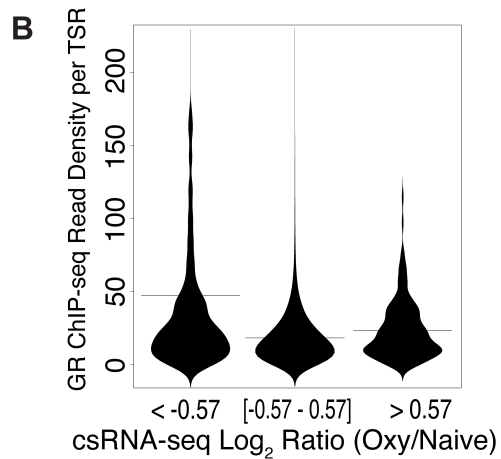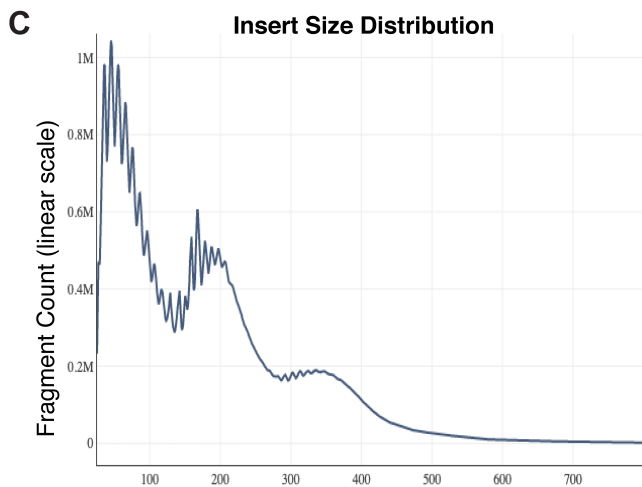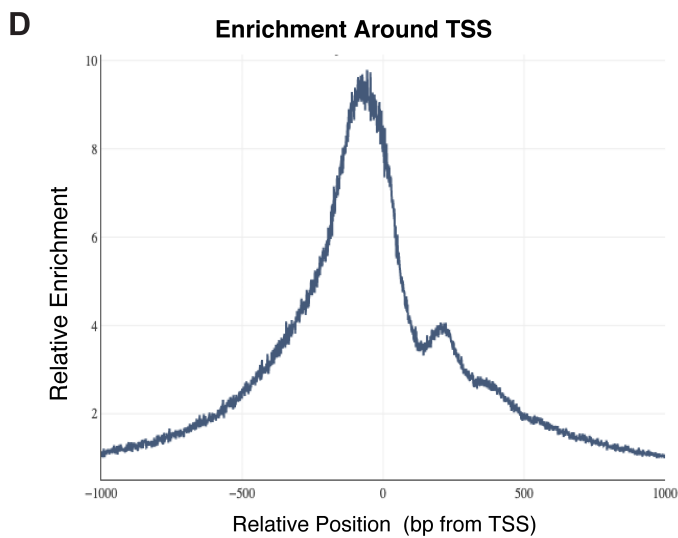

**E**

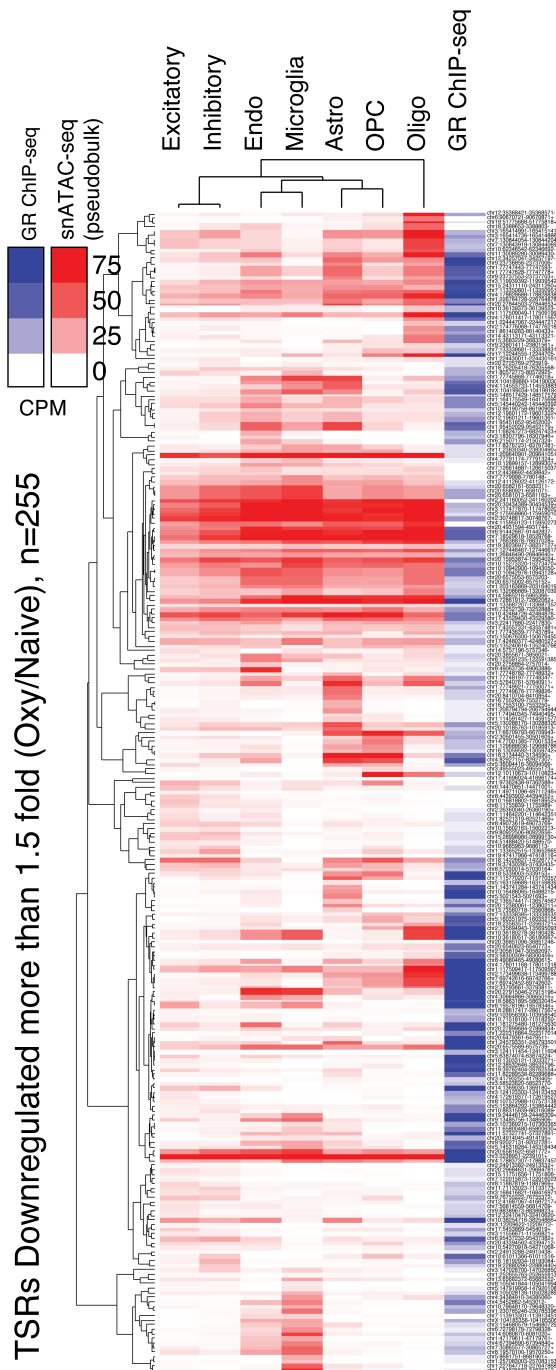

Supplement: Image_4.pdf [file Image_4.pdf]
