# Supplementary material for: Glucocorticoid Receptor-Regulated Enhancers Play a Central Role in the Gene Regulatory Networks Underlying Drug Addiction
Source: Front Neurosci. 2022 May 16;16:858427. doi: 10.3389/fnins.2022.858427 (PMC9149415; doi:10.3389/fnins.2022.858427)
Supplement: Supplementary Table S1 — Alignment Stats. [file Table_1.xlsx]

## Sheet: csRNA sequencing stats
Experiment DirectoryExperiment File	Total reads	% Aligned	% Unique Match	% Multimappers	% unmapped	Genome	Total reads in analysis	Total positions in analysis	Reads per bp	Avg. Reads per position	Median Reads per position	Avg. Read Length	GC-content
RatBrain.NuAcc-csRNAseq-CocHigh-r1-DB789-rn7-191108	12845933	0.938	0.781	0.157	0.062	rn7	8470131	2315323	0.003219	3.647	2	34.806	0.586
RatBrain.NuAcc-csRNAseq-CocHigh-r2-DB794-rn7-191108	15960256	0.93	0.747	0.182	0.07	rn7	9874948	2714814	0.003751	3.627	2	33.428	0.586
RatBrain.NuAcc-csRNAseq-Naive-r1-DB786-rn7-191108	17037564	0.9	0.658	0.242	0.1	rn7	8935735	2082238	0.003395	3.67	1	31.764	0.543
RatBrain.NuAcc-csRNAseq-Naive-r2-DB798-rn7-191108	15324742	0.947	0.805	0.142	0.053	rn7	9865452	3133095	0.003747	3.148	1	34.109	0.584
RatBrain.NuAcc-csRNAseq-OxyHigh-r2-DB796-rn7-191108	14741164	0.868	0.666	0.202	0.132	rn7	7991632	1814646	0.003036	4.404	2	34.385	0.591
RatBrain.PFC-csRNAseq-CocHigh-r1-DB788-rn7-191108	16234256	0.943	0.583	0.36	0.057	rn7	7652894	2903126	0.002907	2.636	1	33.068	0.567
RatBrain.PFC-csRNAseq-CocHigh-r2-DB793-rn7-191108	15240484	0.88	0.69	0.191	0.119	rn7	8465855	2731998	0.003216	3.07	1	33.495	0.573
RatBrain.PFC-csRNAseq-Naive-r1-DB785-rn7-191108	15085003	0.947	0.754	0.193	0.053	rn7	9363666	3331179	0.003557	2.811	1	33.83	0.575
RatBrain.PFC-csRNAseq-Naive-r2-DB797-rn7-191108	14760401	0.942	0.771	0.171	0.058	rn7	9370190	2913451	0.003559	3.214	1	33.872	0.573
RatBrain.PFC-csRNAseq-OxyHigh-r1-DB791-rn7-191108	15530214	0.958	0.77	0.187	0.042	rn7	9836870	3263437	0.003736	3.014	1	33.488	0.576
RatBrain.PFC-csRNAseq-OxyHigh-r2-DB795-rn7-191108	14865448	0.872	0.688	0.183	0.128	rn7	8212358	2742448	0.003119	2.965	1	33.571	0.577
RatBrain.NuAcc-csinput-CocHigh-r1-DB803-rn7-191108	11005431	0.954	0.458	0.496	0.046	rn7	4005150	268102	0.001522	11.974	1	24.745	0.513
RatBrain.NuAcc-csinput-CocHigh-r2-DB808-rn7-191108	9845701	0.969	0.455	0.514	0.031	rn7	3505082	251739	0.001332	12.112	1	24.134	0.501
RatBrain.NuAcc-csinput-Naive-r1-DB800-rn7-191108	10665731	0.952	0.468	0.484	0.048	rn7	4011377	244378	0.001525	13.829	1	26.09	0.505
RatBrain.NuAcc-csinput-Naive-r2-DB812-rn7-191108	9366252	0.977	0.479	0.498	0.023	rn7	3548789	215452	0.00135	13.728	1	25.132	0.51
RatBrain.NuAcc-csinput-OxyHigh-r2-DB810-rn7-191108	8821755	0.955	0.439	0.517	0.045	rn7	3056391	302807	0.001162	8.9	1	26.082	0.495
RatBrain.PFC-csinput-CocHigh-r1-DB802-rn7-191108	12891164	0.959	0.459	0.5	0.041	rn7	4728535	228533	0.001797	15.323	1	25.502	0.507
RatBrain.PFC-csinput-CocHigh-r2-DB807-rn7-191108	11840598	0.946	0.469	0.478	0.054	rn7	4334191	211979	0.001648	15.327	1	24.155	0.504
RatBrain.PFC-csinput-Naive-r1-DB799-rn7-191108	11964569	0.923	0.457	0.466	0.077	rn7	4380139	187273	0.001665	16.797	1	23.502	0.507
RatBrain.PFC-csinput-Naive-r2-DB811-rn7-191108	11022610	0.962	0.455	0.507	0.038	rn7	3964893	180131	0.001508	16.836	1	24.349	0.513
RatBrain.PFC-csinput-OxyHigh-r1-DB805-rn7-191108	11354384	0.967	0.471	0.496	0.033	rn7	4275516	218442	0.001629	14.4	1	24.862	0.506
RatBrain.PFC-csinput-OxyHigh-r2-DB809-rn7-191108	10597663	0.967	0.473	0.495	0.033	rn7	3980525	231260	0.001518	13.416	1	23.854	0.503
