# Supplementary material for: Glucocorticoid Receptor-Regulated Enhancers Play a Central Role in the Gene Regulatory Networks Underlying Drug Addiction
Source: Front Neurosci. 2022 May 16;16:858427. doi: 10.3389/fnins.2022.858427 (PMC9149415; doi:10.3389/fnins.2022.858427)
Supplement: Supplementary Table S2 — Motif Enrichment Results. [file Table_2.xlsx]

## Sheet: HOMER logP motif enrichment
Table 2: Homer logP motif enrichment values based on sequences from [-150,+50] relative to the primary TSS in each TSR.
Transcription Factor (DBD)	Consensus	NAc (All)	NAc (Promoters)	NAc (Enhancers)	PFC (All)	PFC (Promoters)	PFC (Enhancers)
Sp5(Zf)	RGKGGGCGGAGC	-6937	-3034	-4111	-7612	-3132	-4778
KLF14(Zf)	RGKGGGCGKGGC	-6132	-1610	-3072	-6663	-1713	-3445
Sp2(Zf)	YGGCCCCGCCCC	-5543	-2474	-2796	-5978	-2448	-3331
KLF1(Zf)	VDGGGYGGGGCY	-5334	-2895	-2654	-5921	-2998	-3122
KLF5(Zf)	DGGGYGKGGC	-4007	-2092	-2094	-4327	-2154	-2330
KLF3(Zf)	NRGCCCCRCCCHBNN	-3985	-2316	-2108	-4277	-2330	-2209
Sp1(Zf)	GGCCCCGCCCCC	-3975	-2661	-1390	-4221	-2673	-1435
Rfx2(HTH)	GTTGCCATGGCAACM	-3218	-378.7	-3939	-3958	-429.2	-5088
RFX(HTH)	CGGTTGCCATGGCAAC	-3215	-379.1	-3692	-4024	-441.8	-4973
KLF6(Zf)	MKGGGYGTGGCC	-2839	-1165	-660.7	-3388	-1173	-852
Klf9(Zf)	GCCACRCCCACY	-2814	-1308	-1348	-3057	-1329	-1534
X-box(HTH)	GGTTGCCATGGCAA	-2516	-232.3	-3066	-3200	-224.4	-3941
NFY(CCAAT)	RGCCAATSRG	-2482	-1550	-452.4	-2612	-1601	-561.2
NFIL3(bZIP)	VTTACGTAAYNNNNN	-2477	-368.6	-2548	-2435	-327.5	-2345
Maz(Zf)	GGGGGGGG	-2357	-629.1	-1361	-2558	-653.1	-1523
Rfx1(HTH)	KGTTGCCATGGCAA	-2053	-189.8	-2485	-2594	-191.4	-3091
Fli1(ETS)	NRYTTCCGGH	-1976	-1026	-491.2	-2980	-1055	-1289
Elk4(ETS)	NRYTTCCGGY	-1947	-1140	-70.48	-2506	-1086	-259.2
Elk1(ETS)	HACTTCCGGY	-1912	-1051	-127.4	-2540	-1026	-415.4
ETS(ETS)	AACCGGAAGT	-1901	-1300	-411.6	-2300	-1309	-855.7
Rfx5(HTH)	SCCTAGCAACAG	-1859	-219.2	-1555	-2259	-264.4	-1734
ELF1(ETS)	AVCCGGAAGT	-1802	-1238	-326.8	-2345	-1279	-768.8
GABPA(ETS)	RACCGGAAGT	-1802	-1149	-591.2	-2633	-1167	-1317
Fos(bZIP)	NDATGASTCAYN	-1791	-8.015	-2261	-1734	-12.89	-2199
Fra1(bZIP)	NNATGASTCATH	-1764	-5.378	-2057	-1707	-8.508	-2052
ETV1(ETS)	AACCGGAAGT	-1737	-979.4	-377	-2771	-968	-1102
ETV4(ETS)	ACCGGAAGTG	-1725	-883.6	-298.4	-2536	-854	-865.1
Atf3(bZIP)	DATGASTCATHN	-1709	-4.916	-2027	-1659	-8.047	-2017
bZIP50(bZIP)	GATGACGTCA	-1702	-805.5	-1153	-2262	-760.2	-1791
Klf4(Zf)	GCCACACCCA	-1700	-877.5	-754.4	-1857	-920.4	-894
Ronin(THAP)	RACTACAACTCCCAGVAKGC	-1688	-956.8	-479.1	-1465	-938.8	-468.5
ETS1(ETS)	ACAGGAAGTG	-1684	-901.1	-591.1	-2813	-897.5	-1478
Fra2(bZIP)	GGATGACTCATC	-1656	-3.278	-2046	-1709	-5.167	-2124
JunB(bZIP)	RATGASTCAT	-1620	-2.91	-1859	-1538	-6.47	-1888
AP-1(bZIP)	VTGACTCATC	-1580	-3.841	-1963	-1524	-5.062	-1909
Elf4(ETS)	ACTTCCKGKT	-1575	-850.4	-462.7	-2460	-907.8	-1271
BATF(bZIP)	DATGASTCAT	-1566	-3.368	-1805	-1533	-3.84	-1764
SUT1?	CCCCGCGC	-1507	-390.7	-1003	-1461	-387	-979.7
GFY-Staf(?,Zf)	RACTACAATTCCCAGAAKGC	-1490	-877.3	-124.3	-1246	-800.1	-76.27
Atf1(bZIP)	GATGACGTCA	-1485	-625	-897.9	-1937	-617.6	-1317
CTCF(Zf)	AYAGTGCCMYCTRGTGGCCA	-1475	-114.8	-1366	-2077	-131.4	-1773
Fosl2(bZIP)	NATGASTCABNN	-1473	-3.928	-1815	-1611	-7.499	-1968
TGA6(bZIP)	TGACGTCABC	-1468	-722.4	-1013	-2050	-737.6	-1547
Egr1(Zf)	TGCGTGGGYG	-1393	-133.1	-1388	-1514	-118.7	-1342
Jun-AP1(bZIP)	GATGASTCATCN	-1393	-5.877	-1707	-1534	-9.159	-1758
Usf2(bHLH)	GTCACGTGGT	-1391	-323.3	-1026	-1399	-267.3	-1251
Etv2(ETS)	NNAYTTCCTGHN	-1359	-791	-621.5	-2454	-802	-1574
WT1(Zf)	MCTCCCMCRCAB	-1330	-36.96	-1167	-1383	-36.78	-1273
ERG(ETS)	ACAGGAAGTG	-1325	-822.9	-644.9	-2311	-828.2	-1536
HY5(bZIP)	RRTSACGTSD	-1325	-607.9	-694.2	-1514	-562.8	-1048
NRF(NRF)	STGCGCATGCGC	-1320	-651.8	-337.4	-1201	-633.2	-380.7
Mef2b(MADS)	GCTATTTTTGGM	-1312	-28.6	-1344	-1834	-44.48	-1952
Mef2c(MADS)	DCYAAAAATAGM	-1311	-16.69	-1273	-1597	-19.01	-1675
TGA4(bZIP)	RTGACGTCAKCW	-1304	-645.8	-869.9	-1786	-666.8	-1419
NRF1(NRF)	CTGCGCATGCGC	-1277	-662.3	-376.9	-1233	-604.6	-537.9
CREB5(bZIP)	VVATGACGTCAT	-1248	-276.7	-777.1	-1488	-347.2	-898.7
Atf7(bZIP)	NGRTGACGTCAY	-1243	-436.8	-680.7	-1657	-475.5	-934.6
SeqBias: CG bias	SSSSSSSSSS	-1242	-318.8	-527.5	-1372	-326.1	-562.5
TGA2(bZIP)	ACGTCAYCHH	-1241	-693.8	-874.6	-1691	-653	-1427
KLF10(Zf)	GGGGGTGTGTCC	-1221	-566.3	-206	-1376	-581.9	-229
TGA10(bZIP)	ATGACGTC	-1216	-689.9	-938.8	-1551	-665.4	-1196
CRE(bZIP)	CSGTGACGTCAC	-1184	-607.6	-695.3	-1460	-612.7	-930
TGA5(bZIP)	NNGATGACGTCATCN	-1183	-492.3	-813.8	-1488	-551.3	-1105
ATAF1(NAC)	YACGTMAY	-1169	-475.8	-591	-1385	-474.1	-862.5
TGA1(bZIP)	TGACGTCAKC	-1144	-563	-795	-1699	-597.7	-1311
Atf2(bZIP)	NRRTGACGTCAT	-1115	-401.7	-548.5	-1480	-404.1	-851.3
Mef2d(MADS)	GCTATTTTTAGC	-1107	-28.65	-1095	-1172	-27.94	-1250
HLF(bZIP)	RTTATGYAAB	-1085	-33.79	-1389	-1041	-31.6	-1128
BORIS(Zf)	CNNBRGCGCCCCCTGSTGGC	-1077	-109	-1072	-1562	-121.1	-1424
EWS:FLI1-fusion(ETS)	VACAGGAAAT	-1033	-653.6	-283	-1516	-662.1	-683.4
JunD(bZIP)	ATGACGTCATCN	-1022	-417.6	-817.7	-1345	-473	-1047
EHF(ETS)	AVCAGGAAGT	-1020	-499.1	-250.5	-1780	-579.3	-806.4
TFE3(bHLH)	GTCACGTGACYV	-1005	-309.6	-685.2	-967.8	-237.5	-794.6
GFY(?)	ACTACAATTCCC	-996.6	-740.6	-260.5	-868.3	-742.4	-226.2
En1(Homeobox)	NDCTAATTAS	-981.8	-230.9	-699.3	-542.6	-220.6	-346.2
TGA9(bZIP)	VTGACGTC	-972.9	-487.6	-760.4	-1353	-515.1	-1001
c-Jun-CRE(bZIP)	ATGACGTCATCY	-966.4	-330.5	-728.6	-1314	-350	-1012
Mef2a(MADS)	CYAAAAATAG	-964.5	-16.1	-724.4	-1208	-25.13	-1081
ELF5(ETS)	ACVAGGAAGT	-953.2	-513.2	-450.7	-1661	-578.9	-1294
USF1(bHLH)	SGTCACGTGR	-929.3	-224	-686.1	-900.9	-192.3	-671.3
Cbf1(bHLH)	TCACGTGAYH	-912.6	-267.6	-686	-853.7	-236.6	-766.4
NAP(NAC)	ARGTTACGTRTN	-870.8	-386.9	-367.9	-1062	-403.3	-633.9
SeqBias: A/T bias	WWWWWWWWWW	-866.3	-70.83	-221.7	-1070	-87.5	-298.1
TGA3(bZIP)	WTGATGACGTCATCW	-865.3	-371	-603.8	-1065	-410.6	-889.8
MITF(bHLH)	RTCATGTGAC	-856.9	-199.6	-679.1	-820.3	-182.1	-913.1
SPCH(bHLH)	WNBCACGTGA	-823.6	-180	-614.9	-789.1	-173.1	-580.5
NAM(NAC)	RGTTRCGTRW	-803.8	-363.2	-351.3	-947.5	-397.9	-618.6
Egr2(Zf)	NGCGTGGGCGGR	-769.8	-152	-617.9	-865.6	-144.4	-695.4
CLOCK(bHLH)	GHCACGTG	-722	-198.2	-496.5	-605.4	-157.1	-425.3
E-box(bHLH)	SSGGTCACGTGA	-713	-277.3	-377.8	-685.6	-238.1	-527.3
BIM3(bHLH)	TWVTCACGTGAB	-710.3	-271.8	-497.4	-678.3	-239.8	-593.8
FEA4(bZIP)	TGACGTCACS	-700.7	-400.2	-327.1	-842.8	-388.2	-414.3
ELF3(ETS)	ANCAGGAAGT	-699.4	-248.6	-226	-1368	-289.5	-738.6
PU.1(ETS)	AGAGGAAGTG	-694.8	-155.3	-665	-1474	-175.5	-1558
BIM2(bHLH)	NNNNCACGTGNN	-667.1	-136.1	-369	-558.4	-115.9	-324.9
SPDEF(ETS)	ASWTCCTGBT	-646.1	-337.6	-138.5	-1053	-321	-493.8
Bach2(bZIP)	TGCTGAGTCA	-624.3	-1.075	-813.8	-736.6	-2.675	-826.4
SeqBias: GA-repeat	GAGAGAGAGA	-611.5	-23.62	-314	-753.5	-28.79	-308.2
SeqBias: polyA-repeat	AAAAAAAAAA	-596.2	-142	-380.2	-675.3	-151.9	-540.4
PIF5ox(bHLH)	BCACGTGVDN	-591.7	-98.27	-253.6	-552.5	-74.98	-239.8
Rfx6(HTH)	TGTTKCCTAGCAACM	-576.5	-47.52	-383.4	-539	-62.46	-357.2
Sox2(HMG)	BCCATTGTTC	-572.5	0	-761.4	-205.2	0	-129.8
PU.1-IRF(ETS:IRF)	MGGAAGTGAAAC	-554.4	-195	-213.7	-718.1	-186.4	-443.1
Sox21(HMG)	BCCWTTGTBYKV	-546.8	0	-605	-231.7	0	-143.4
Sox3(HMG)	CCWTTGTY	-539.6	0	-502.8	-184.9	0	-92.16
SpiB(ETS)	AAAGRGGAAGTG	-519.7	-197.1	-440.4	-996.4	-255.8	-998.7
Smad3(MAD)	TWGTCTGV	-514.5	-114.4	-236.7	-805.8	-136.3	-587.5
ZNF143|STAF(Zf)	ATTTCCCAGVAKSCY	-512.4	-329.8	-181	-441.4	-268.4	-120.3
SeqBias: CA-repeat	CACACACACA	-508.7	-0.2001	-64.06	-748	-0.4191	-50.37
E-box	GCCACGTG	-505.4	-150.6	-264.6	-440	-130.5	-220.8
PIF4(bHLH)	NNBCACGTGN	-504.8	-74.04	-145.2	-469.8	-53.92	-121.6
TF3A(C2H2)	NNDDGAGGAGGWNNN	-500.8	-56.09	-515.9	-547.8	-41.39	-492.7
Sox10(HMG)	CCWTTGTYYB	-498.9	0	-543.4	-207.9	0	-124.8
bHLHE40(bHLH)	KCACGTGMCN	-496.4	-176.5	-302.5	-411.1	-154.3	-263.8
bHLH74(bHLH)	DRATCACGTGAB	-492.4	-163.5	-336.2	-495.6	-149.8	-386.2
Tgif2(Homeobox)	TGTCANYT	-477.3	-49.49	-738.6	-114.2	-26.88	-248.5
TAGL1(MADS)	CCAAAAATRG	-459.1	-36.69	-311.6	-723.3	-53.43	-588.3
Tgif1(Homeobox)	YTGWCADY	-457.9	-41.71	-643.7	-98.77	-23.04	-126.4
bHLH34(bHLH)	HGWGRHWGACACGTG	-452	-129.2	-232.2	-375.3	-105.8	-178.7
Lhx3(Homeobox)	ADBTAATTAR	-443.8	-47.19	-284.1	-210.1	-34.75	-74.26
EWS:ERG-fusion(ETS)	ATTTCCTGTN	-442.6	-154.4	-267.6	-1095	-167.6	-807.9
STZ(C2H2)	HNBTCACT	-437.3	-92.14	-225.2	-647.9	-117.8	-295.3
Zfp281(Zf)	CCCCTCCCCCAC	-429	-0.6184	-296.3	-538.8	-0.5628	-366.1
LHX9(Homeobox)	NGCTAATTAG	-428.7	-51.72	-380.3	-210.5	-33.51	-131.9
EKLF(Zf)	NWGGGTGTGGCY	-420.2	-125	-239.2	-537.1	-131	-313.9
ANAC047(NAC)	WACACGTAACTT	-417.6	-211.9	-280.7	-501.7	-231.5	-407.6
ZNF467(Zf)	TGGGGAAGGGCM	-412.3	-6.08	-245.4	-517	-11.71	-331.4
Meis1(Homeobox)	VGCTGWCAVB	-410.9	-44.29	-446.7	-54.29	-45.15	-38.99
Znf263(Zf)	CVGTSCTCCC	-395.3	-12.99	-290.9	-264.4	-7.776	-153.8
RIN(MADS)	CYAAAAWWGG	-395.2	-38.21	-188.5	-531.7	-58.9	-276.6
AtGRF6(GRF)	NTGTCAGADNNNNNN	-393.1	-88.88	-367.8	-203.8	-84.02	-166
IRF8(IRF)	GRAASTGAAAST	-392.5	-213.5	-297.9	-790.2	-291.6	-746.8
Sox6(HMG)	CCATTGTTNY	-389.2	0	-439.4	-164.2	0	-58.65
Sox17(HMG)	CCATTGTTYB	-388.3	0	-359.3	-122	0	-29.89
BIM1(bHLH)	NNNNNNVTCACGTGM	-385.3	-164.5	-254.5	-373.3	-135.8	-241.6
Sox9(HMG)	AGGVNCCTTTGT	-384.2	-0.07176	-550	-214	-0.001429	-269.6
bHLHE41(bHLH)	KCACGTGMCN	-375.5	-82.21	-134.5	-188.9	-75	-45.02
Sox15(HMG)	RAACAATGGN	-360.4	0	-633	-117.9	0	-166
Brn1(POU,Homeobox)	TATGCWAATBAV	-359.7	-21.87	-239.5	-393.8	-39.63	-248.8
Ets1-distal(ETS)	MACAGGAAGT	-359	-101.1	-369.3	-950.8	-118.6	-1133
DLX1(Homeobox)	NSNNTAATTA	-350.4	-8.03	-338	-102.8	-2.541	-53.77
Sox4(HMG)	YCTTTGTTCC	-348.3	0	-476.4	-163	0	-166.5
Oct6(POU,Homeobox)	WATGCAAATGAG	-336.8	-7.813	-190.7	-423.3	-7.28	-180.7
BMAL1(bHLH)	GNCACGTG	-336.6	-30.23	-34.75	-257	-10.8	-12.67
c-Myc(bHLH)	VCCACGTG	-332.8	-74.85	-263.1	-312.8	-60.93	-214.4
DLX2(Homeobox)	NNNTAATTAS	-329.8	-4.329	-322.3	-125.3	-2.377	-84.5
Atf4(bZIP)	MTGATGCAAT	-328.1	-40.52	-335.3	-432.1	-47.38	-436.6
PIF7(bHLH)	CCACGTGGNH	-327.2	-69.48	-242.4	-365.7	-64.95	-248.1
AREB3(bZIP)	NKGMCACGTGDCMNN	-320.1	-74.1	-242.4	-362	-62.97	-272.3
TATA-Box(TBP)	CCTTTTAWAGSC	-318.1	0	0	-374.9	0	0
LBD18(LOBAS2)	CKGAWWTTCHGS	-312.4	-32.06	-1.185	-372.5	-25.52	-0.158
Max(bHLH)	RCCACGTGGYYN	-303.5	-63.83	-42.43	-325.9	-50.21	-25.65
NF-E2(bZIP)	GATGACTCAGCA	-294.1	-4.897	-342.8	-299.1	-5.954	-337.8
At5g04390(C2H2)	AGTGANDN	-293.4	-85.65	-351	-460.2	-113.1	-479.3
E2F4(E2F)	GGCGGGAAAH	-283.9	-223.9	-93.19	-236.9	-239.3	-133.1
GAGA-repeat	CTYTCTYTCTCTCTC	-281.9	-2.654	-61.52	-270.4	-2.318	-17.45
GFX(?)	ATTCTCGCGAGA	-272.7	-200	-34.4	-221.4	-231.4	-47.87
GBF6(bZIP)	WWTGMCACGTCABCW	-271.3	-62.44	-224	-342	-53.64	-257.2
AT1G28160(AP2EREBP)	GGCGGCGG	-270.8	-223.1	-122.9	-194.6	-212.4	-79.95
YY1(Zf)	CAAGATGGCGGC	-267.2	-411.8	-8.983	-150.4	-418.1	-0.01094
bZIP68(bZIP)	WGCCACGTGK	-265.2	-61.93	-150.6	-270.4	-55.08	-162.9
E2F3(E2F)	BTKGGCGGGAAA	-264.8	-61.68	-53.02	-225.9	-55.83	-32.81
DLX5(Homeobox)	SSTAATTA	-264.3	-2.284	-244.1	-84.73	-0.3014	-44.89
bZIP28(bZIP)	TGCCACGTSABH	-257.9	-67.64	-178.1	-309	-49.7	-222.5
Lhx2(Homeobox)	TAATTAGN	-256.3	-2.256	-260.4	-88.84	-0.101	-56.53
Oct4(POU,Homeobox)	ATTTGCATAW	-255.7	-17.49	-139.7	-351	-10.52	-165.4
bZIP3(bZIP)	DWKNHSACGTGGCAD	-255.2	-51.69	-171.2	-285.9	-46.27	-192.3
NF1-halfsite(CTF)	YTGCCAAG	-254.4	-3.486	-543.6	-489	-12.17	-1001
bZIP53(bZIP)	NDNHSACGTGKMNNN	-250.3	-62.95	-157.2	-305.5	-51.21	-210
SCL(bHLH)	AVCAGCTG	-248.2	-0.000449	-257.8	-477.6	-0.000185	-570.6
n-Myc(bHLH)	VRCCACGTGG	-248.1	-58.51	-35.94	-231.8	-38.03	-15.01
Gfi1b(Zf)	MAATCACTGC	-247.3	-65.54	-156.2	-287	-69.11	-235.4
Bach1(bZIP)	AWWNTGCTGAGTCAT	-247.3	-1.518	-286.9	-283.5	-2.244	-310.8
NPAS(bHLH)	NVCACGTG	-246.4	-21.91	-15.62	-205.4	-10.98	-4.931
PU.1:IRF8(ETS:IRF)	GGAAGTGAAAST	-242.6	-78.07	-251.4	-501.8	-110.7	-630.6
Stat3+il21(Stat)	SVYTTCCNGGAARB	-242.1	-44.15	-50.07	-300.5	-54.83	-99.64
LBD23(LOBAS2)	GCGNAWWWTNCGCYW	-241.5	-145.5	-159.7	-257.8	-142.8	-237.8
Nrf2(bZIP)	HTGCTGAGTCAT	-237.1	-5.139	-259.9	-263	-8.53	-267.4
Oct11(POU,Homeobox)	GATTTGCATA	-235.3	-26.91	-143.2	-361.7	-34.32	-172.6
ABI5(bZIP)	GCCACGTG	-235.1	-45.12	-119.9	-202.4	-37.55	-135.1
PGR(NR)	AAGAACATWHTGTTC	-235.1	-1.3e-05	-162.7	-321	-0.002422	-178.8
MNT(bHLH)	DGCACACGTG	-228.9	-36.55	-21.05	-194.1	-24.85	-3.23
Sox7(HMG)	VVRRAACAATGG	-228	-1e-05	-297.3	-78.18	0	-72.85
Hoxa9(Homeobox)	RGCAATNAAA	-227.7	-118.3	-9.259	-125.9	-75.87	-0.03875
E2FA(E2FDP)	WWTGGCGCCAWWWNN	-226	-157.8	-83.99	-217	-173.1	-65.89
MYB(HTH)	GGCVGTTR	-224.7	-47.29	-103.2	-298.6	-37.33	-135.1
ETS:RUNX(ETS,Runt)	RCAGGATGTGGT	-224.2	-155.9	-181.2	-363.1	-177.6	-290.4
MYB88(MYB)	HNACGCTCCT	-220.7	-74.26	-226.1	-237.6	-70.6	-273.5
MYB3(MYB)	GKTAGGTRGG	-219.1	-5.237	-38.49	-116.7	-2.398	-0.5072
MYB81(MYB)	NWAACSGWTWNN	-213.4	-0.253	-46.68	-279.7	-0.2213	-119.4
At4g36780(BZR)	NNNNNNCACGTGNNN	-213.1	-68.27	-148.2	-158.4	-52.8	-91.05
Initiator	NTCAGTYG	-209.4	-24.41	-1.43	-331.3	-18.87	-28.31
Pbx3(Homeobox)	SCTGTCAMTCAN	-207.7	-90.86	-163.6	-32.72	-70.03	-26.86
ABF2(bZIP)	KGMCACGTGDCMHHH	-204.4	-68.25	-165.5	-227.5	-46.16	-216.1
Stat3(Stat)	CTTCCGGGAA	-204.3	-47.3	-1.408	-245.5	-44.89	-7.124
CArG(MADS)	CCATATATGGNM	-202.8	-32.02	-92.36	-252.1	-26.88	-111.4
Nkx6.1(Homeobox)	GKTAATGR	-201.9	-0.008789	-235.8	-27.93	-7.9e-05	-10.79
GBF5(bZIP)	WKNWSACGTGGCAWN	-201.2	-45.08	-151.5	-217.1	-38.15	-187.8
At1g75490(AP2EREBP)	CACCGMCT	-201.1	-49.33	-56.8	-192	-39.62	-93.05
CEBP(bZIP)	ATTGCGCAAC	-200	-10.17	-206.8	-206.2	-21.75	-141.2
GRF9(GRF)	NWCTGACANNNNNNN	-198.5	-6.21	-244.9	-28.7	-4.724	-31.11
ARF2(ARF)	TTGTCGGMWN	-197.9	-1.197	-88.55	-199.2	-3.045	-62.37
Pho2(bHLH)	CCCACGTGCT	-195.9	-27.59	-44.73	-162	-14.48	-22.43
GRE(NR),IR3	VAGRACAKWCTGTYC	-195.1	0	-151.8	-305.1	-6.1e-05	-196.4
MYB101(MYB)	TAACNRMY	-194.8	-26.41	-94.51	-238.9	-22.7	-80.74
ABF1(bZIP)	CACGTGGC	-192.9	-43.69	-107.4	-144	-29.17	-60.15
Pknox1(Homeobox)	SCTGTCAVTCAV	-190.4	-88.37	-168.6	-39.88	-89.72	-35.66
Foxo1(Forkhead)	CTGTTTAC	-188.8	-0.8764	-44.67	-489	-4.588	-306.7
Oct2(POU,Homeobox)	ATATGCAAAT	-188.5	-14.76	-70.32	-240.2	-14.37	-102.6
IRF3(IRF)	AGTTTCAKTTTC	-187.6	-29.11	-127.7	-494.4	-61.47	-479.9
Rbpj1(?)	HTTTCCCASG	-187.1	-5.432	-148.1	-218.8	-1.537	-158
Lhx1(Homeobox)	NNYTAATTAR	-186	-0.9484	-180.7	-71.46	-0.03615	-26.66
SOC1(MADS)	TWCCAWWTWTGG	-185.2	-14.59	-155	-271.7	-29.87	-290.4
AtHB32(ZFHD)	CGAATTAT	-184.9	-2.897	-299.8	-74.45	-1.767	-129.1
Pitx1(Homeobox)	TAATCCCN	-181.4	-8.235	0	-244.4	-4.365	0
AGL63(MADS)	TTCCAAWWWTGG	-180.4	-17.96	-162.1	-246.3	-43.37	-265.9
LBD19(LOBAS2)	CCKGAAWTTCMGGAW	-179.1	-46.47	-5.362	-219.2	-40.11	-4.524
bZIP48(bZIP)	DDWWKVTSACGTGGC	-176.3	-43.73	-159	-231.2	-29.74	-193.5
MafK(bZIP)	GCTGASTCAGCA	-176.1	-0.7125	-233.9	-244.6	-1.564	-228.7
MYB73(MYB)	NNNNHAACNGHHDHN	-175.9	-0.1093	-63.82	-250.4	-0.07856	-165.8
Dlx3(Homeobox)	NDGTAATTAC	-175.4	-0.2028	-266.1	-36.39	-0.005948	-58.4
ASL18(LOBAS2)	CCGGAAAWTCMGGAR	-175.3	-90.35	-22.85	-211.2	-82.69	-23.67
NPAS2(bHLH)	KCCACGTGAC	-170.7	-40.46	-94.16	-63.35	-19.79	-37.04
bZIP16(bZIP)	TGCCACGTGD	-169.7	-46.67	-114	-191.8	-30.66	-136
AMYB(HTH)	TGGCAGTTGG	-169	-24.24	-111.8	-220.6	-18.27	-185.6
Chop(bZIP)	ATTGCATCAT	-167.1	-34.52	-123	-298.5	-26.74	-220.9
NFE2L2(bZIP)	AWWWTGCTGAGTCAT	-166.4	-0.2937	-149.5	-211.8	-1.272	-148.4
ARE(NR)	RGRACASNSTGTYCYB	-165.3	-2e-05	-65.78	-220.6	-5e-06	-45.08
SeqBias: TA-repeat	TATATATATA	-164.5	-0.003549	-56.81	-304.7	-0.003919	-75.26
Trl(Zf)	RGAGAGAG	-164.4	-16.08	-134.6	-106.9	-14.86	-81.93
PR(NR)	VAGRACAKNCTGTBC	-164	0	-61.26	-346.4	0	-111.9
MYB94(MYB)	WGGTRGTTGGKA	-163.6	-14.1	-106.4	-155	-19.27	-60.82
GRE(NR),IR3	NRGVACABNVTGTYCY	-163.3	-1.9e-05	-105.4	-198.1	-1.8e-05	-99.66
BMYB(HTH)	NHAACBGYYV	-161.6	-77.33	-127.7	-213.3	-62.56	-277.9
TATA-box	BBHWTATATA	-161	-9.426	-19.53	-197.6	-10.16	-25.73
PBX1(Homeobox)	GSCTGTCACTCA	-160.8	-59.1	-113.2	-23.15	-49.89	-31.27
HIF-1b(HLH)	RTACGTGC	-159.2	-45.3	-62.19	-91.96	-32.94	-19.37
MYB96(MYB)	WGGTRGTTGG	-158.4	-8.394	-24.1	-139.4	-12.24	-5.58
Npas4(bHLH)	NHRTCACGACDN	-154.4	-65.19	-112.6	-227.5	-71.43	-200.5
MYB30(MYB)	AGGTAGTTGG	-153.8	-0.215	-4.352	-129.8	-0.7939	-0.06008
AZF1(C2H2)	DKSWCACT	-148.5	-62.15	-161.2	-276.5	-75.31	-268.7
ERF15(AP2EREBP)	WDHAGCMGCCAT	-148.2	-19.01	-95.85	-164.4	-16.22	-121.2
AT1G71450(AP2EREBP)	DHDWTGTCGGTG	-146.1	-70.77	-28.58	-134.4	-55.22	-18.2
SeqBias: polyC-repeat	CCCCCCCCCC	-144	-8.633	-20.57	-164.1	-17.06	-30.33
ATHB25(ZFHD)	TAATTAVB	-142.6	-0.000967	-227	-11.32	-0.000351	-37.94
AT5G05550(Trihelix)	HDNHDTCKCCGGMGA	-142.4	-58.87	-12.2	-194.4	-74.99	-23.12
IRF2(IRF)	GAAASYGAAASY	-142.1	-108.8	-114.7	-469.9	-134.5	-408.2
DREB19(AP2EREBP)	AATGTCGGTK	-140.1	-123	-29.95	-133.7	-132.3	-44.08
Ap4(bHLH)	NAHCAGCTGD	-139.1	-3.662	-216.2	-192.8	-4.12	-327.7
At1g78700(BZR)	NNNNCACGTGNNNNN	-138.9	-33.9	-91.1	-93.74	-29.51	-41.87
SeqBias: CG-repeat	CGCGCGCGCG	-138.4	-293	-93.98	-115.5	-282.9	-80
AT5G02460(C2C2dof)	CHCCTTTT	-136.7	-52	-22.93	-89.73	-28.96	-0.5388
bZIP52(bZIP)	NDNHCAGCTGTCANN	-136.6	-3.62	-106.8	-153.8	-2.85	-127.8
ANAC046(NAC)	ACACGYWAYC	-134.9	-54.86	-21.69	-177.2	-61.19	-42.79
At5g18450(AP2EREBP)	CACCGCTT	-134.1	-44.53	-52.02	-101.5	-39.72	-26.7
SeqBias: G/A bias	RRRRRRRRRR	-134	-33.59	-242	-202.9	-35.63	-266.6
Nanog(Homeobox)	RGCCATTAAC	-133.8	-43.83	-86.58	-103.7	-50.65	-19.58
ATHB33(ZFHD)	NGTRATTAAK	-130.8	-0.00204	-163.3	-3.305	-0.001105	-0.1317
CAMTA1(CAMTA)	WWAACGCGTT	-130.6	-69.6	-71.18	-130	-88.65	-62.32
ATHB23(ZFHD)	HTAATTARNN	-128.5	-0.000886	-251.9	-6.369	-0.000296	-48.2
MafA(bZIP)	TGCTGACTCA	-128.2	-5.811	-147	-233.8	-10.21	-199.3
GATA14(C2C2gata)	AYCAGATCTG	-127.9	-3.841	-13.9	-174.9	-9.53	-54.87
Smad2(MAD)	CTGTCTGG	-127.7	-21.34	-75.57	-251	-16.86	-197.7
CEBP:AP1(bZIP)	DRTGTTGCAA	-126.5	-22.82	-87.87	-228.3	-39.76	-128.3
bHLH157(bHLH)	KACACGTCTCTY	-125.9	-91.33	-76.18	-167.8	-65.28	-93.05
STAT4(Stat)	NYTTCCWGGAAR	-125.8	-23.12	-52.68	-199.4	-27.1	-101.7
VRN1(ABI3VP1)	TTTTTTTTTT	-123.4	-5.288	-0.1879	-173.8	-2.074	0
E2F6(E2F)	GGCGGGAARN	-122.8	-66.74	-139.5	-112.5	-76.2	-88.47
SEP3(MADS)	CCAAAAAGGG	-122.2	-16.86	-15.49	-250.6	-19.74	-38.5
IRF1(IRF)	GAAAGTGAAAGT	-121.6	-51.09	-126.5	-354.7	-69.27	-318.2
GBF3(bZIP)	TGCCACGTSAYC	-121.3	-24.27	-87.94	-109.3	-21.46	-104.2
MYB65(MYB)	RACNGTTA	-119.7	-18.03	-108	-136.2	-17.9	-88.29
ZNF341(Zf)	GGAACAGCCG	-117.5	-4.057	-25.05	-127.8	-1.186	-9.138
GT3a(Trihelix)	WNACACGTGTYWWAW	-117.3	-18.44	-66.91	-134	-18.41	-51.16
IBL1(bHLH)	CACGTGCC	-114.8	-19.75	-62.78	-60.25	-11.22	-22.07
At3g60580(C2H2)	WTTYTACT	-114.7	-34.76	-84.21	-264.9	-59.86	-276.3
MafB(bZIP)	WNTGCTGASTCAGCANWTTY	-113.7	-0.008917	-51.66	-162.4	-0.08341	-75.57
MYB33(MYB)	DDTYNGTTAN	-112.2	-0.02559	-25.37	-211.3	-0.07647	-103.7
Smad4(MAD)	VBSYGTCTGG	-111.9	-16.99	-54.73	-196.9	-12.28	-138.7
AT1G49560(G2like)	GAWTCTNWDA	-108.8	-1.704	-58.37	-121.6	-5.806	-134.5
ATHB34(ZFHD)	TRATTARS	-108.1	-0.05879	-211.6	-8.387	-0.02284	-39.16
MYB61(MYB)	HCYACCTACC	-106.8	-5.337	-11.33	-45.63	-2.372	-0.000507
MYB77(MYB)	NYAACBGYMC	-106.3	-17.84	-14.25	-141.9	-9.909	-27.69
REM19(REM)	AAAAAAAA	-105.1	-9.091	-0.8622	-165.1	-2.303	-1.8e-05
ANAC038(NAC)	ACACGTWAYC	-103.7	-30.04	-3.856	-167.7	-34.13	-27.68
GATA4(C2C2gata)	DDWTYAGATCTR	-103.5	-5.148	-22.58	-191	-11.49	-87.01
SeqBias: GCW-triplet	GCWGCWGCWGCW	-103.1	-61.62	-201.4	-141.4	-62.28	-233.2
GATA12(C2C2gata)	YAGATCTRAW	-102.8	-5.236	-29.37	-182.9	-11.14	-94.01
DPL-1(E2F)	TAGCGCGC	-102.5	-69.42	-0.0678	-61.6	-46.59	0
DEAR2(AP2EREBP)	HCACCGACAWHD	-102.3	-111.5	-28.86	-112.5	-115.5	-24.02
Tlx?(NR)	CTGGCAGSCTGCCA	-100.4	-0.0756	-155.9	-172.8	-0.01136	-315.8
SeqBias: C/A-bias	MMMMMMMMMM	-99.75	-52.46	-248.6	-186.5	-57.69	-267.2
OCT4-SOX2-TCF-NANOG(POU,Homeobox,HMG)	ATTTGCATAACAATG	-97.62	-1.333	-64.71	-74.52	-1.277	-73.54
MYB13(MYB)	HYCACCWACCHH	-96.42	-5.971	-29.68	-42.44	-3.75	-3.54
OCT:OCT(POU,Homeobox)	ATGAATATTCATGAG	-96.23	-20.26	-59.27	-169.2	-33.08	-89.55
ISRE(IRF)	AGTTTCASTTTC	-94.72	-80.14	-89.06	-288	-93.99	-249.6
HuR(?)	BTTTGGTTTG	-94.53	-10.7	-0.37	-281.3	-10.48	-33.35
DEL2(E2FDP)	WTTTCSCGCC	-93.98	-28.82	-4.014	-91.88	-32.13	-9.102
ATHB24(ZFHD)	TAATTAAS	-93.95	-0.003752	-199.5	-6.985	-0.002008	-39.38
ZBTB33(Zf)	GGVTCTCGCGAGAAC	-93.71	-82.58	-7.751	-53.26	-82.18	-7.369
Knotted(Homeobox)	GAYGNGACRGGN	-92.24	-58.65	-69.02	-75.08	-58.5	-45.11
Pit1+1bp(Homeobox)	ATGCATAATTCA	-90.51	-1.145	-98.87	-39.81	-0.3964	-45.76
RRTF1(AP2EREBP)	CCGCCGCHATTT	-90.17	-69.13	-1.15	-100.2	-92.22	-7.425
GATA11(C2C2gata)	DDHYYAGATCTR	-89.02	-9.416	-18.63	-155.1	-9.075	-78.82
Arnt:Ahr(bHLH)	TBGCACGCAA	-89	-30.3	-80.45	-91.4	-29.36	-50.19
ATY13(MYB)	YYYAACYRHH	-87.9	-2.154	-0.008743	-40.88	-1.17	0
MYB107(MYB)	RGTWGGTRRR	-87.29	-6.62	-32.58	-50.03	-8.497	-2.852
Hoxa13(Homeobox)	CYHATAAAAN	-85.07	-14.78	-19.27	-70.4	-6.053	-4.025
AARE(HLH)	GATTGCATCA	-84.18	-12.89	-66.34	-183	-25	-123.8
Hoxd13(Homeobox)	NCYAATAAAA	-82.94	-15.99	-46.24	-63.28	-4.737	-5.11
Unknown3	AYTAAACCGG	-82.03	-39.85	-82.28	-125.1	-37.51	-121.4
NFAT(RHD)	ATTTTCCATT	-81.77	-10.21	-55.75	-216.1	-16.42	-182.8
MYB93(MYB)	GGTAGGTGRD	-80.39	-11.08	-30.71	-30.13	-7.304	-7.151
OBP3(C2C2dof)	NYWACTTTTT	-79.61	-24.5	-3.489	-79.22	-15.69	-3.779
MYB70(MYB)	WTAACNGTTA	-77.95	-2.5e-05	-24.04	-60.86	-4e-06	-43.93
Brn2(POU,Homeobox)	ATGAATATTC	-77.66	-2.553	-71.85	-81.09	-6.044	-71.14
At1g36060(AP2EREBP)	NNWWKGTCGGTG	-76.38	-51.05	-21.74	-74.9	-56.4	-42.59
At5g65130(AP2EREBP)	CCRCCGACAWTN	-75.69	-34.19	-0.2811	-60.43	-40.79	-0.9255
AT1G47655(C2C2dof)	YHACTTTTTS	-75.55	-24.47	-0.01611	-72.64	-17.74	-3e-06
SVP(MADS)	ANTTWCCHAATTTGG	-73.81	-5.94	-61.19	-109.1	-16.36	-82.02
LBD13(LOBAS2)	KCCGTNWTTTBCGGC	-73.7	-38.38	-5e-06	-93.59	-33.34	0
GAGA-repeat	CTCTCTCTCY	-72.86	0	-0.09961	-63.6	0	0
DREB2(AP2EREBP)	TMACCGACATWA	-71.96	-48.37	-25.75	-72.63	-53.73	-24.46
MyoD(bHLH)	RRCAGCTGYTSY	-69.83	-3.5e-05	-78.15	-42.89	-2.2e-05	-82.87
TATA-box	CTATAAAAGCSV	-69.81	-11.92	-41.77	-100.3	-16.08	-12.59
AGL6(MADS)	TTWCCWWAWWDGGWA	-69.36	-6.592	-72.02	-97.96	-24.5	-105.3
TCX2(CPP)	NNWWTTYRAAHN	-69.14	-16.67	-63.36	-103.9	-13.72	-130.7
MYB92(MYB)	GGTAGGTR	-69.13	-1.146	-15.92	-17.77	-0.6291	-0.007141
OCT:OCT(POU,Homeobox,IR1)	ATGAATWATTCATGA	-68.28	-0.7092	-65.01	-149.1	-1.543	-86.47
E-box	AACAGCTGTTHN	-68.21	-19.48	-109.7	-50.37	-21.54	-140.1
SOL1(CPP)	ATTTAAATHN	-68.17	-12.22	-64.45	-109.8	-10.59	-139.3
JGL(C2H2)	ACYTTCAGTT	-67.34	-5.038	-4.649	-83.8	-2.313	-19.3
Myf5(bHLH)	BAACAGCTGT	-66.21	-1.77	-136	-35.1	-1.566	-115.6
Pho4(bHLH)	AAGCACGTGBGD	-65.07	-10.17	-46.9	-58.94	-8.076	-16.63
At2g33710(AP2EREBP)	WTKGCGGCKR	-64.56	-78.36	-0.3916	-76.05	-71	-0.1012
AGL25(MADS)	TTTCCATWTWTGGAA	-64.45	-6.574	-27.08	-85.29	-5.637	-85.56
Tbx5(T-box)	AGGTGTCA	-64.31	-6.608	-146.9	0	-4.023	-0.07492
MYB98(MYB)	NWDCCGTTAC	-64.17	-19.96	-61.52	-62.17	-21.81	-56.15
ATHB6(Homeobox)	AATGATTG	-63.7	-5.445	-72.58	-1.603	-4.97	-2.616
PBX2(Homeobox)	RTGATTKATRGN	-61.88	-17.81	-61.08	-4.199	-10.02	-2.049
ZNF189(Zf)	TGGAACAGMA	-61.64	-0.3609	-62.46	-77.45	-0.7597	-52.7
AT2G20110(CPP)	ATTYAAATHY	-61.07	-15.42	-53.76	-88.75	-11.27	-104.7
Hoxd11(Homeobox)	VGCCATAAAA	-60.27	-15.63	-4.948	-59.43	-4.284	-0.0337
HIC1(Zf)	TGCCAGCB	-60.13	-0.009225	-283.8	-82.05	-0.03611	-285.8
MyoG(bHLH)	AACAGCTG	-59.92	-0.9051	-158.2	-37.93	-0.5777	-172.3
Nkx3.1(Homeobox)	AAGCACTTAA	-59.49	-11.48	-1e-05	-106.7	-12.53	-0.000367
Tbx20(T-box)	GGTGYTGACAGS	-59.44	-3.794	-42.06	-44.91	-5.928	-34.55
AT1G76870(Trihelix)	AAAACCRGWW	-59.31	-0.3075	0	-77.93	-0.7997	0
bcd(Homeobox)	VNNGGATTADNN	-59.02	-1.605	0	-51.34	-0.4847	0
WUS1(Homeobox)	CAWTCATTCA	-59	-5.624	-13.5	-28.8	-10.85	-23.07
MYB119(MYB)	YRACCGTTACDD	-59	-11.26	-49.44	-38.43	-5.112	-39.09
MYB17(MYB)	GGTAGGTGRG	-58.57	-2.916	-17.67	-19.49	-2.544	-0.3416
AT4G37180(G2like)	AGAATCTTNN	-58.26	-3.816	-66.09	-92.09	-2.665	-123.6
AT2G31460(REMB3)	WNWARWDGAAATGAT	-58.13	-1.969	-64.05	-72.89	-3.901	-113.9
AT1G20910(ARID)	THAATTRAWN	-57.95	-1.414	-5.969	-8.533	-1.464	0
MYB83(MYB)	CACCAACCWH	-57.62	0	-0.004647	-34.93	0	0
At1g25550(G2like)	NAGATTCY	-57.27	-5.66	-70.6	-94.64	-6.283	-119.9
LBD2(LOBAS2)	TCCGAWTTTTTCGGN	-57.19	-24.73	-7.431	-75.45	-35.52	-2.378
Replumless(BLH)	HGTCWHATCA	-57.04	-14.8	-109.2	-57.92	-14.15	-38.66
Isl1(Homeobox)	CTAATKGV	-56.86	-5.728	-31.12	-16.76	-2.142	-0.5495
At5g08750(C3H)	NWDTTGCGGCTR	-55.48	-42.45	-32.25	-70.84	-50.12	-70.55
Pit1(Homeobox)	ATGMATATDC	-54.57	-0.00017	-0.001794	-92.47	0	-0.000255
bZIP18(bZIP)	KGMCAGCTND	-54.5	-0.08866	-31.78	-107.9	-1.187	-60.67
Tcf21(bHLH)	NAACAGCTGG	-54.3	-0.002244	-59.85	-73.67	-0.000535	-116.2
ANAC045(NAC)	DNCKTVNNNNNNAMG	-53.84	-17.09	-18.53	-47.06	-21.95	-23.23
REF6(Zf)	TVCTCTGTTT	-53.51	-3.053	-72.36	-77.97	-3.675	-158.4
OCT:OCT-short(POU,Homeobox)	ATGCATWATGCATRW	-53.49	-2.659	-81.92	-59.33	-0.3219	-81.27
STAT1(Stat)	NATTTCCNGGAAAT	-53.24	-8.393	-1.093	-59.37	-8.183	-3.398
Hoxd12(Homeobox)	HDGYAATGAAAN	-51.96	-0.05397	-0.4981	-28.94	-0.1887	-0.006735
At1g64620(C2C2dof)	CACTTTTT	-51.54	-19.67	-22.25	-33.97	-9.096	-12.58
ATHB13(Homeobox)	CAATAATT	-50.76	-0.2044	-77.41	-0.09674	-0.1788	-0.373
CRX(Homeobox)	GCTAATCC	-50.44	-0.9635	-2e-06	-76.14	-0.9744	0
CEJ1(AP2EREBP)	WWTGTCGGTG	-50.31	-52.98	-16.91	-56.76	-49.28	-20.99
STAT5(Stat)	RTTTCTNAGAAA	-50.04	-39.29	-34.44	-47.7	-39.61	-51.77
AT3G12130(C3H)	TMACTTTTTV	-49.62	-15.17	-0.1941	-41.13	-7.722	-0.00354
ATHB5(HB)	AATGATTG	-49.58	-7.273	-49.91	-1.123	-4.483	-0.5406
At5g62940(C2C2dof)	WHWHHACTTTTT	-49.49	-7.066	-0.1781	-46.58	-2.858	-1.2e-05
ERF13(AP2EREBP)	TYAGCCGCCATT	-49.11	-27.18	-5.025	-47.57	-20.83	-8.131
ANAC079(NAC)	TACACGCAACCT	-48.6	-40.73	-16.54	-47.17	-37.96	-32.04
ANAC094(NAC)	DVCGTRNNNNNYACG	-46.88	-19.85	-8.545	-36.31	-23.15	-8.338
MYB105(MYB)	RATWCCGTTA	-45.85	-6.445	-53.44	-82.23	-13.32	-79.7
AT2G28810(C2C2dof)	VAAAAAGTWA	-45.82	-4.334	0	-35.82	-0.8499	0
RKD2(RWPRK)	GACKTTTCRDCTTCC	-44.97	-5.078	-7.835	-36.99	-14.71	-10.62
TEAD3(TEA)	TRCATTCCAG	-44.54	-3.793	-18.23	-116.4	-5.624	-73.69
IRF4(IRF)	ACTGAAACCA	-44.24	-6.953	-24.22	-102.6	-22.61	-92.63
SPL15(SBP)	WDWMMGTACADW	-44.19	-1.259	-64.93	-39.04	-8.775	-62.08
At3g12730(G2like)	AAGATTCT	-43.64	-2.004	-65.2	-77.54	-2.374	-127.6
CELF2(RRM)	RGTGTCAG	-43.24	-0.9571	-45.82	-2.183	-0.9874	-0.109
AT3G10030(Trihelix)	GCCGTTAA	-43.14	-20.94	-50.56	-51.03	-27.66	-29.87
Six2(Homeobox)	GWAAYHTGAKMC	-43.12	-29.48	-19	-85.05	-15.67	-14.7
dof24(C2C2dof)	TWMCTTTTTG	-42.87	-22.81	-4.437	-51.73	-15.19	-2.034
Unknown(Homeobox)	SSCMATWAAA	-42.83	-14.44	-10.38	-34.01	-6.378	-0.0206
MYB56(MYB)	HTAACGRMHY	-42.61	-12.97	-8.129	-78.2	-15.76	-26.03
VND6(NAC)	DCTTNHTTTTYAMGY	-42.53	-0.789	-0.000237	-52.25	-0.8179	0
SPL1(SBP)	HYGTACDTWH	-42.04	-2.605	-17.93	-46.81	-6.59	-20.5
Twist2(bHLH)	MCAGCTGBYH	-41.92	0	-5.014	-248.5	0	-144.2
RLR1?	WTTTTCYYTTTT	-41.69	-1.741	0	-74.04	-0.8291	0
Bapx1(Homeobox)	TTRAGTGSYK	-41.63	-14.43	-13.2	-76.22	-4.9	-26.75
ZSCAN22(Zf)	SMCAGTCWGAKGGAGGAGGC	-41.63	-18.59	-54.74	-56.22	-19.67	-60.3
ABR1(AP2EREBP)	AAATGGCGGCGG	-41.51	-54.29	-0.1561	-51.38	-42.53	-0.02843
TEAD4(TEA)	CCWGGAATGY	-41.49	-2.9	-20.33	-95.92	-2.87	-43.71
dof45(C2C2dof)	NVAWAAAGTN	-40.9	-0.864	0	-38.4	-0.4806	0
c-Myc(bHLH)	VVCCACGTGG	-40.9	-7.603	-0.1883	-51.03	-5.096	-0.05267
AGL15(MADS)	TTTCCHWATWDGGAA	-40.73	-6.66	-47.4	-55.46	-20.05	-99.41
HIF-1a(bHLH)	TACGTGCV	-40.07	-14.04	-15.96	-23.1	-23.3	-13.69
Adof1(C2C2dof)	NRWAAAGYDV	-39.84	-11.54	0	-43.66	-2.597	0
ATHB40(HB)	HCAATWATTG	-39.51	-1.938	-56.55	-0.5656	-0.5602	-0.3795
GATA1(C2C2gata)	DDWWYYAGATCTRRW	-39.22	-4.248	-1.917	-87.33	-4.963	-42.11
TEAD1(TEAD)	CYRCATTCCA	-39.18	-0.5866	-10.31	-94.84	-1.161	-28.69
HAT2(Homeobox)	CYAATSATTR	-39.14	-23.9	-24.42	-6.264	-15.31	-0.002597
GLIS3(Zf)	CTCCCTGGGAGGCCN	-38.69	-4.1e-05	-49.73	-48.04	-0.000148	-61.98
At5g52660(MYBrelated)	HAAAAATATCTW	-38.35	-0.4377	-8.005	-25.97	-0.3209	-10.15
AT3G57600(AP2EREBP)	GGCGGTGG	-38.22	-19.36	-11.3	-21.93	-14.3	-8.261
At3g24120(G2like)	NWWAGMATMW	-37.54	-4.9e-05	-11.66	-78.61	-1e-06	-35.34
Pdx1(Homeobox)	YCATYAATCA	-37.43	-0.000567	-36.58	-0.3973	-3e-06	-0.0363
ERF115(AP2EREBP)	WTKRCGGCGB	-37.17	-50.39	-15.3	-45.82	-44.14	-15.39
bZIP:IRF(bZIP,IRF)	NAGTTTCABTHTGACTNW	-36.99	-1.451	-0.549	-81.63	-2.165	-7.615
E2F7(E2F)	VDTTTCCCGCCA	-36.73	-33.8	-15.86	-16.95	-35.39	-22.52
Hoxd10(Homeobox)	GGCMATGAAA	-36.71	-1.782	-0.01032	-31.03	-0.03791	-2.6e-05
RAP26(AP2EREBP)	HDATGGCGGCGG	-36.58	-44.35	-0.4441	-36.11	-30.12	-0.1482
FHY3(FAR1)	HHCACGCGCBTN	-36.36	-34.27	-25.26	-66.46	-33.88	-40.85
AT5G45580(G2like)	ADRGAATCTH	-36.34	-0.03908	-2.724	-46.57	-1e-06	-1.563
Tal1	CATCTG	-36.08	0	-12.04	-217.4	0	-97.17
Hoxa11(Homeobox)	TTTTATGGCM	-35.74	-16.41	-6.612	-35.68	-5.702	-0.4187
LIN-39(Homeobox)	ATGATTRATG	-35.73	-0.000987	-36.89	-0.1184	-0.000203	-0.001516
PAX3:FKHR-fusion(Paired,Homeobox)	ACCRTGACTAATTNN	-35.43	-1.021	-7.354	-22.21	-2.053	-5.801
NeuroG2(bHLH)	ACCATCTGTT	-35.39	0	-36.06	-283.5	0	-332.4
ATHB21(HB)	YCAATWAT	-34.4	-31.7	-18	-10.6	-33.43	-0.6518
Tcf12(bHLH)	VCAGCTGYTG	-33.69	-0.000622	-160.6	-24.29	-4.9e-05	-193.2
At4g16750(AP2EREBP)	HACCGACAHA	-33.63	-21.5	-0.4651	-40.93	-21.28	-0.284
Hoxa10(Homeobox)	GGYAATGAAA	-33.36	-0.02012	-0.02495	-16.5	-0.01353	-0.742
At3g09600(MYBrelated)	AAAATATCTT	-33.1	-0.000798	-0.7674	-22.59	-0.1559	-0.2704
SRS7(SRS)	HATAGGTTTH	-32.74	-1.04	0	-5.087	-1.18	0
E2F1(E2F)	CWGGCGGGAA	-32.69	-31.39	-17.44	-12.41	-31.8	-10.23
CHR(?)	SRGTTTCAAA	-32.69	-7.471	-36.41	-26.41	-13.33	-59.09
AT2G15740(C2H2)	DHNDWATCGATD	-32.49	-18.04	-60.73	-79.02	-15.25	-82.42
ERF8(AP2EREBP)	CGCCGYCATW	-31.75	-50.04	-0.04493	-37.36	-33.34	-0.001093
OBP1(C2C2dof)	NHHACTTTWT	-31.18	-1.304	0	-38.33	-1.408	0
AT5G23930(mTERF)	GGCGGCTG	-30.7	-12.59	-71.44	-42.98	-9.49	-61.4
RAP212(AP2EREBP)	CGCCGCCATTTT	-30.63	-42.06	-0.000143	-30.26	-29.2	0
ERF4(AP2EREBP)	WDWTGGCGGCGG	-30.13	-56.17	-0.03629	-31.22	-38.52	-0.01524
BBX31(Orphan)	NAAAAAGTDA	-29.81	-1.748	-3.9e-05	-35.8	-0.1446	0
ETS:E-box(ETS,bHLH)	AGGAARCAGCTG	-29.75	-1.928	-20.29	-74.02	-3.05	-39.35
GSC(Homeobox)	RGGATTAR	-29.7	-0.2864	-0.007405	-13.86	-0.2994	0
HRE(HSF)	BSTTCTRGAABVTTCYAGAA	-29.09	-7.173	-34.28	-43.73	-1.805	-53.94
PAX5(Paired,Homeobox),condensed	GTCACGCTCSCTGM	-28.87	-7.675	-11.8	-32.95	-8.793	-19.96
MYB3R1(MYB)	WWDTDACCGTTR	-28	-8.8	-21.73	-41.95	-19.18	-51.47
GATA19(C2C2gata)	ATCSGATCVG	-27.87	-2.222	-25.31	-28.54	-4.355	-19.79
MYB116(MYB)	AGTTAGGCAN	-27.77	-2.73	-20.27	-5.603	-4.272	-1.46
FRS9(ND)	RGAGAGAGAAAG	-27.72	-1.686	-15.58	-21	-0.3006	-1.647
HLH-1(bHLH)	RACAGCTGTTBH	-27.53	-2.026	-73.42	-39.65	-0.6094	-123.1
Tbr1(T-box)	AAGGTGTKAA	-27.18	-0.9475	-56.61	-32.02	-1.966	-63.03
AGL13(MADS)	TWCCAWWTWTGGWAA	-26.65	-2.307	-36.25	-48.95	-12.24	-70.96
MYB113(MYB)	HNDAWTCMGTTAYWN	-26.65	-0.1838	-9.017	-23.29	-2.487	-7.226
AR-halfsite(NR)	CCAGGAACAG	-26.28	0	-128.9	-86.75	0	-153.2
HRE(HSF)	TTCTAGAABNTTCTA	-25.97	-6.986	-7.137	-38.81	-1.645	-23.63
BPC1(BBRBPC)	GARGAGAGAGAA	-25.93	-3.123	-33.95	-18.41	-0.9678	-22.29
At3g45610(C2C2dof)	TWACTTTTTS	-25.93	-1.064	0	-26.57	-0.2138	0
dof42(C2C2dof)	AAAAAGGC	-25.58	-41.5	-24.85	-0.5966	-25.33	-5.563
AT1G24250(Orphan)	KTDGTTGGTDGTTGG	-24.78	-0.612	-0.000113	-33.14	-0.821	0
AT3G09735(S1Falike)	TTCTAGAANMTTCTA	-24.15	-5.679	-22.17	-48.48	-1.916	-55.16
E2F(E2F)	TTSGCGCGAAAA	-24.05	-23.02	-1.461	-18.53	-18.01	-1.081
Six1(Homeobox)	GKVTCADRTTWC	-23.99	-13.94	-19.13	-20.62	-14.18	-11.73
bZIP44(bZIP)	NDTGCCACGTCAGCH	-23.94	-16.35	-6.015	-50.56	-14.39	-47.16
At2g01060(G2like)	AGATKCBNWW	-23.8	-0.000571	-3.924	-44.83	0	-12.95
LMI1(HB)	AATTATTG	-23.65	-0.32	-45.53	-0.008989	-0.3944	-0.09714
AT3G52440(C2C2dof)	DTHACTTTTT	-23.47	-4.06	-0.000254	-13.4	-1.642	0
At4g01280(MYBrelated)	AAATATCT	-23.33	-0.3326	-4.205	-25.22	-0.6533	-10.25
GATA6(C2C2gata)	TAGATCTARAHH	-23.28	-0.1807	-0.02542	-37.06	-0.08694	-6.048
Atoh1(bHLH)	VNRVCAGCTGGY	-23.28	0	-33.23	-214.6	-6e-06	-254.8
ANAC083(NAC)	CKTRWNNNWYAMGTA	-23.21	-1.406	-0.9837	-23.87	-1.247	-0.1899
SPL5(SBP)	NNHGTACGGHNN	-23.16	-20.92	-27.85	-25.53	-21.75	-22.11
Otx2(Homeobox)	NYTAATCCYB	-23.14	-0.06593	0	-7.154	-0.7563	0
BAM8(BES1)	NNWSACACGTGTSWN	-23.13	-12.02	-13.18	-9.497	-4.612	-1.493
REB1	KCCGGGTAAYRR	-22.92	-8.54	-36.25	-12.66	-8.397	-23.45
STOP1(C2H2)	DTATCTGGKGRAGGT	-22.66	-1.322	-16.12	-9.707	-2.874	-10
CAMTA5(CAMTA)	ACGCGTTTTANACRC	-22.63	-11.32	-10.37	-38.83	-13.05	-27.16
MYB118(MYB)	TAWCCGTTAC	-22.58	-14.98	-33.92	-23.33	-11.88	-29.16
MYB62(MYB)	NTACCTAACT	-22.55	-2.684	-2.37	-1.331	-7.562	0
NF1(CTF)	CYTGGCABNSTGCCAR	-22.54	-0.1686	-131.4	-149.7	-0.06645	-397.5
FoxD3(forkhead)	TGTTTAYTTAGC	-22.28	-2.084	-12.27	-188.4	-2.151	-133.6
KANADI1(Myb)	ARGAATAWWN	-22.09	-0.002893	-44.06	-33.18	0	-23.67
Bcl6(Zf)	NNNCTTTCCAGGAAA	-22.01	-9.531	-3.807	-80.89	-8.954	-30.48
bZIP69(bZIP)	GACAGCTGKCAW	-21.71	-1.58	-26.5	-23.35	-1.382	-38.09
T1ISRE(IRF)	ACTTTCGTTTCT	-21.67	-5.655	-8.11	-48.13	-12.2	-39.19
AGL16(MADS)	TWCCHWATWDGGAAA	-21.33	-5.724	-27.55	-33.79	-5.014	-60.76
PRDM15(Zf)	YCCDNTCCAGGTTTT	-21.18	-6.486	-0.6143	-25.63	-13.87	-6.146
SGR5(C2H2)	TTTGTCTTTTTT	-21.1	0	-70.14	-1.694	-0.000673	-11.52
AT2G40260(G2like)	WAAAYATTCTTT	-21.06	-0.7727	-75.43	-86.39	-0.004473	-144.6
ANAC057(NAC)	DVCKTGNNNNNCAMG	-21.03	-0.01511	-0.002337	-14.61	-0.01897	0
Oct4:Sox17(POU,Homeobox,HMG)	CCATTGTATGCAAAT	-20.99	-0.08966	-59.98	-5.894	-0.001644	-29.67
RAP211(AP2EREBP)	RGCCGGCYWW	-20.86	-3.528	-8.528	-70.48	-5.729	-39.29
SPL11(SBP)	YTGTACTTBH	-20.73	-0.001637	-16.77	-19.93	-0.2622	-23.81
ZBTB18(Zf)	AACATCTGGA	-20.47	-0.000591	-64.77	-0.6605	-4.6e-05	-16.44
Dorsal(RHD)	GGGAAAAMCCCG	-20.4	-19.08	-13.68	-33.86	-9.671	-37.81
MYB3R4(MYB)	AWWTAACCGTTR	-20.27	-7.994	-20.97	-44.89	-8.146	-54.94
HOXB13(Homeobox)	TTTTATKRGG	-20.27	-6.788	-1.133	-37.97	-6.834	-0.05177
ZNF7(Zf)	CTGCCWVCTTTTRTA	-20.04	-7.337	-24.56	-26.64	-7.49	-15.07
COG1(C2C2dof)	DAAAAAGTGA	-20.02	-11.18	-3.787	-32.21	-13.82	-4.679
ATY19(MYB)	YYCACCWACCAT	-19.84	-0.1639	-0.001441	-0.2238	-0.004919	0
Zfp57(Zf)	NANTGCSGCA	-19.48	-13.52	0	-15.64	-17.76	0
PRDM1(Zf)	ACTTTCACTTTC	-19.4	-10.55	-36.83	-33.41	-10.38	-64.47
BOS1(MYB)	NNRCCTAACT	-19.18	-8.129	-12.22	-12.59	-10.37	-0.3883
MYB55(MYB)	YACCWAMC	-18.76	-1.158	-2e-06	-1.55	-0.3245	0
HAT1(Homeobox)	SCAATCATTGNN	-18.7	-6.523	-12.13	-1.296	-2.241	-0.9175
CDF3(C2C2dof)	AAAAGTRM	-18.63	-7.887	-9.714	-38.43	-13.32	-12.92
PRDM9(Zf)	ADGGYAGYAGCATCT	-18.57	-0.7333	-41.6	-14.67	-1.386	-38.5
Foxh1(Forkhead)	NNTGTGGATTSS	-18.55	-7.582	-1.914	-39.64	-12.42	-15.63
Unknown3	ACVAKCTGGCAGCGC	-18.48	-4.444	-32.63	-18.79	-4.412	-19.42
HSF3(HSF)	NTTCTAGAAKCTTCT	-18.41	-0.3807	-4.167	-51.75	-2.064	-15.51
GATA(Zf),IR3	NNNNNBAGATAWYATCTVHN	-18.12	-0.5186	-19.86	-29.98	-2.181	-24.6
ATHB6(Homeobox)	CAATNATTBN	-17.58	-1.366	-39.06	-0.0163	-3.572	-0.8239
TBP3(MYBrelated)	VYTAGGGCAN	-17.34	-12.54	-0.04489	-22.18	-16.48	-0.2294
ATHB7(Homeobox)	AATGATTG	-17.23	-12.07	-4.039	-0.1604	-17.98	-1e-06
dof43(C2C2dof)	NAAAAAGTDA	-17.05	-4.037	-0.05776	-23.09	-1.629	0
At1g68670(G2like)	WNWWHNRAAGATTCT	-16.94	-3.775	-27.95	-25.89	-0.5939	-22.61
AT1G12630(AP2EREBP)	TGTCGGCA	-16.81	-17.56	-1.051	-13.32	-12.21	-0.5275
ANAC071(NAC)	DNCKTNDNNNHNAAG	-16.63	-0.8976	-3.252	-17.52	-1	-3.305
IRF:BATF(IRF:bZIP)	CTTTCANTATGACTV	-16.62	-2.318	-28.51	-36.13	-4.355	-32.58
TCF4(bHLH)	SMCATCTGKH	-16.4	0	-0.7697	-195	0	-89.12
BHLHA15(bHLH)	NAMCAGCTGK	-16.33	0	-9.732	-198.7	0	-220.6
MYB51(MYB)	GGTAGGTG	-16.25	-2.147	-2.8e-05	-1.249	-0.2516	0
SND2(NAC)	CTTVWNNNWBAAGNW	-16.14	-2.866	-0.3908	-14.23	-4.448	-0.071
ATHB20(Homeobox)	CAATHATT	-16.12	-2.82	-46.34	-0.000459	-0.9154	-0.01025
TOD6?	GCGATGAGMT	-15.9	-0.7334	-48.37	-5.486	-0.574	-37.34
PABPC1(?)	HAATAAAGNN	-15.83	-0.01888	-0.105	-33.4	-2.3e-05	-5.343
Zic(Zf)	CCTGCTGAGH	-15.82	-0.9529	-43.39	-36.48	-0.7526	-156.8
ZNF317(Zf)	GTCWGCTGTYYCTCT	-15.68	-1.354	-23.22	-19.47	-2.524	-55.47
FOXK2(Forkhead)	SCHTGTTTACAT	-15.67	-0.3049	-0.02816	-140.1	-0.4727	-35.59
HOXD13(Homeobox)	NCYAATAAAA	-15.58	-0.05657	-0.000291	-1.945	-0.000234	0
Hoxc9(Homeobox)	GGCCATAAATCA	-15.52	-8.292	-8.345	-32.29	-11.24	-12.4
RBFox2(?)	TGCATGCA	-15.45	-9.528	-2.525	-15.37	-13.95	-1.83
CDM1(C3H)	CCGAWAWTWTCGGAN	-15.44	-8.453	-4.972	-21.92	-17.63	-3.197
MYB10(MYB)	YCCACCTACCHH	-15.29	-0.3927	-0.7598	-0.007652	-0.6303	0
ESE3(AP2EREBP)	GACGGTGG	-15.22	-41.03	-0.4283	-1.962	-34.31	-1.9e-05
Unknown6	AATTTTAAAA	-15.1	-2.164	-17.19	-35.54	-0.1204	-37.84
Prop1(Homeobox)	NTAATBNAATTA	-15.06	-0.1206	-26.36	-0.1784	-0.006115	-5.86
Unknown-ESC-element(?)	CACAGCAGGGGG	-15	-1.514	-80.83	-54.46	-1.963	-204.8
ERF105(AP2EREBP)	TGGCGGCT	-14.91	-21.45	-4.988	-22.56	-14.68	-7.138
AT3G58630(Trihelix)	TCTCCGGCGA	-14.88	-13.14	-2.264	-16.99	-14.93	-2.386
At3g04030(G2like)	DRGAATCT	-14.88	-2.381	-23.64	-45.51	-2.479	-30.17
SND3(NAC)	CTTNHNNNDNAAGNH	-14.8	-1.332	-0.1573	-11.94	-0.8765	-0.000713
DDF1(AP2EREBP)	GCCGACAT	-14.79	-6.164	-9.336	-15.37	-8.131	-6.18
Olig2(bHLH)	RCCATMTGTT	-14.75	0	-0.609	-253.7	-1.4e-05	-240.8
KAN2(G2like)	ATATTCTY	-14.57	-0.000552	-37.66	-53.31	0	-32.57
LEF1(HMG)	CCTTTGATST	-14.51	-0.008022	-43.52	-18.81	-0.003282	-24.16
AT2G38300(G2like)	ADRGAATGTT	-14.39	-0.6978	-49.86	-61.41	-0.04871	-90.26
TEAD2(TEA)	CCWGGAATGY	-14.26	-3.298	-4.115	-45.5	-5.339	-18.23
Srebp2(bHLH)	CGGTCACSCCAC	-14.22	-6.222	-25.07	-12.72	-8.051	-32.18
MYB3R5(MYB)	THYAACGGTHAWAWT	-14.21	-9.13	-9.673	-18.12	-4.494	-18.21
VIP1(bZIP)	NTTGACAGCTGTCAN	-13.95	-1.703	-40.24	-16.63	-0.432	-47.67
MYB74(MYB)	YYYACCTACCWH	-13.94	-0.4782	-0.000682	-0.2334	-0.3043	0
PAX6(Paired,Homeobox)	NGTGTTCAVTSAAGCGKAAA	-13.87	-0.1833	-0.8726	-4.738	-0.0168	-0.2261
HSFA6B(HSF)	NTTCTAGAANHTTCT	-13.56	-0.3076	-0.02074	-34.1	-0.03922	-2.601
bHLH18(bHLH)	CACGTGTTYCACGTG	-13.51	-9.527	-4.283	-18.01	-3.295	-5.277
AT1G77200(AP2EREBP)	ACCGACAHWD	-13.48	-11.65	-0.2624	-20.06	-11.74	-0.5406
ANAC075(NAC)	CTTSWWNWWSAAGYT	-13.35	-3.219	-3.677	-10.66	-5.662	-4.908
ANAC070(NAC)	CTTRHDNHNBAAGHW	-13.33	-0.1019	-0.1545	-9.269	-0.2853	-0.01155
RAP21(AP2EREBP)	BCACCGACAHNN	-13.3	-6.953	-3.739	-7.256	-10.99	-3.436
SMB(NAC)	CTTVNNNNDBAAGHW	-13.15	-1.068	-0.6032	-18.38	-0.6681	-0.3149
AT4G26030(C2H2)	BYYACCWACY	-13.14	-1.179	-0.000294	-0.549	-0.1525	0
AtIDD11(C2H2)	TTTGTCGTTT	-12.98	-0.03193	-55.61	-1.063	-0.08284	-12.78
Tbox:Smad(T-box,MAD)	AGGTGHCAGACA	-12.85	-3.991	-40.95	-4.366	-3.354	-19.69
AT3G16280(AP2EREBP)	HCACCGACAHHDHHN	-12.63	-4.411	-0.4824	-12.4	-6.068	-0.02771
MYB67(MYB)	YYYACCTAAC	-12.48	-0.7515	-2.6e-05	-0.4105	-0.1542	0
HIF2a(bHLH)	GCACGTACCC	-12.42	-2.75	-0.924	-3.235	-5.249	-0.5776
Nkx2.5(Homeobox)	RRSCACTYAA	-12.24	-0.004783	0	-42.73	-1.3e-05	-4e-06
At4g31060(AP2EREBP)	CACCGACAAW	-12.16	-9.595	-7.651	-8.03	-14.55	-2.077
AT5G66940(C2C2dof)	NNHACTTTWT	-12.11	-8.93	-0.000328	-26.16	-4.842	-0.008609
STAT6(Stat)	TTCCKNAGAA	-12.07	-5.924	-48.29	-61.52	-3.272	-85.62
MYB99(MYB)	GGTAGGTG	-11.86	-0.7936	-3.6e-05	-0.295	-0.36	0
Unknown2	CATCMCTA	-11.77	0	-3.047	-31.92	0	-4.726
AT1G69570(C2C2dof)	WAAAAGTGHH	-11.58	-13.2	-4.453	-31.2	-33.32	-24.3
MYB58(MYB)	YYYACCWACC	-11.52	-1.77	0	-0.9642	-0.05762	0
RBPJ:Ebox(?,bHLH)	GGGRAARRGRMCAGMTG	-11.46	0	-15.68	-17.59	0	-30.13
ZNF768(Zf)	RHHCAGAGAGGB	-11.42	-3.86	-1.555	-7.759	-6.274	-10.52
NFAT:AP1(RHD,bZIP)	SARTGGAAAAWRTGAGTCAB	-11.34	-0.9275	-50.4	-23.12	-3.798	-51.99
MS188(MYB)	WARKTAGGTRRA	-11.26	-2.185	-6.386	-0.08059	-1.763	-1e-06
MYB4(MYB)	WAGKTAGGTARR	-11.16	-0.4401	-0.000418	-0.005527	-0.3677	0
SPL13(SBP)	WAHTGTACGGAH	-10.96	-21.76	-14.47	-14.39	-30.04	-21.72
AT2G28920(ND)	WAGATATTTWTW	-10.92	-0.00575	-0.1932	-4.25	-0.000202	-0.02408
SPL14(SBP)	NNWHTGTACGGAHNH	-10.81	-26.16	-8.174	-5.871	-39.28	-16.86
At4g28140(AP2EREBP)	DCCACCGACCAW	-10.81	-10.21	-0.9163	-10.76	-14.12	-3.986
MYB40(MYB)	TGGTAGGTRARA	-10.79	-0.6018	-1.515	-0.07361	-0.3688	0
ERF7(AP2EREBP)	ATGRCGGCGG	-10.78	-40.28	0	-10.24	-25.11	0
ATHB53(HB)	CAATAATT	-10.73	-0.4482	-26.85	-0.03703	-0.3179	-0.008449
RUNX1(Runt)	AAACCACARM	-10.71	-0.5698	0	-95.84	-2.611	-0.4962
Rap210(AP2EREBP)	TGTCGGCA	-10.65	-2.477	-0.03472	-11.82	-2.799	-0.05177
LOB(LOBAS2)	CGCCGKAWWTTHCGS	-10.6	-4.944	0	-8.932	-4.432	0
PHA-4(Forkhead)	KTGTTTGC	-10.58	0	0	-237.8	0	-2.5e-05
Hoxb4(Homeobox)	TGATTRATGGCY	-10.43	-0.5279	-9.328	-0.6953	-0.4566	-0.09877
At2g44940(AP2EREBP)	NYACCGACAHNNNNN	-10.4	-3.697	-13.29	-10.03	-7.133	-15.24
GATA20(C2C2gata)	TNGATCNDNM	-10.33	-0.01663	-1e-06	-21.62	-0.09947	0
At4g32800(AP2EREBP)	DYCACCGACAHWWWH	-10.32	-3.725	-8.167	-9.05	-6.228	-3.859
ANAC016(NAC)	WNCTTGNNNNNCAMG	-10.31	-0.01274	-0.08628	-7.502	-0.0159	-0.000128
VND4(NAC)	WRCTTGWANWWCAAG	-10.06	-0.01077	-1e-06	-11.61	-0.01715	0
HOXA9(Homeobox)	GGCCATAAATCA	-10.05	-8.061	-7.864	-8.764	-6.698	-3.89
TEAD(TEA)	YCWGGAATGY	-10.03	-0.8955	-5.71	-52.86	-2.697	-38.89
GATA:SCL(Zf,bHLH)	CRGCTGBNGNSNNSAGATAA	-9.742	-0.1521	-17.8	-22.91	-0.9221	-25.35
HSF6(HSF)	TTYTAGAAGCTTCTA	-9.644	-4.153	-11.64	-32.59	-1.491	-19.12
bHLH28(bHLH)	NHHTGTACGGAH	-9.593	-10.36	-7.319	-8.934	-18.51	-9.005
MYNN(Zf)	TTCAAAWTAAAAGTC	-9.489	-0.1248	-1.493	-12.4	-0.4908	-11.08
LIN-15B(Zf)	CARTGGAGCGCRYTTGCATT	-9.484	-3.523	-4.059	-6.337	-3.786	-5.679
AT5G60130(ABI3VP1)	WTTYTAAGVAAA	-9.37	-2.3e-05	-2e-06	-39.62	-8.2e-05	-9.3e-05
ZBTB12(Zf)	NGNTCTAGAACCNGV	-9.273	0	0	-9.962	-2e-06	0
bHLH10(bHLH)	YACCGACA	-9.248	-3.463	-2e-05	-5.754	-3.812	0
CBF3(AP2EREBP)	YNRCCGACATNN	-9.154	-3.726	-14.19	-10.44	-5.435	-7.123
LHY1(MYBrelated)	AAATATCT	-9.041	-0.05175	-0.621	-5.453	-0.02146	-0.2148
EPR1(MYBrelated)	AAATATCT	-9.041	-0.05175	-0.621	-5.453	-0.02146	-0.2148
VND2(NAC)	DNCKTNNNNNNNAAG	-9.006	-0.1317	-0.009528	-12.41	-0.03993	-0.00074
STAT6(Stat)	ABTTCYYRRGAA	-8.969	-2.492	-28.89	-52.08	-1.403	-66.12
ANAC087(NAC)	WVCKTGHNNNWCAMG	-8.94	-0.06077	-2.2e-05	-4.905	-0.1396	-1e-06
O2(bZIP)	GCTGACGTGGCA	-8.912	-4.236	-17.11	-17.13	-4.673	-46.39
AT5G63260(C3H)	RAAAAAGTRA	-8.681	-1.452	-0.004603	-8.089	-0.7917	0
Nkx2.2(Homeobox)	BTBRAGTGSN	-8.675	-8.084	-0.1916	-31.16	-6.974	-2.892
CBF2(AP2EREBP)	YBRCCGACATNNNNN	-8.641	-9.267	-15.93	-16.43	-8.394	-18.93
ANAC028(NAC)	WRCTTGNNNNNCAAG	-8.64	-0.001701	-1.454	-4.059	-0.01583	-0.4836
VND3(NAC)	TRCTTGWDNHWCAAG	-8.593	-0.002791	-2.6e-05	-13.01	-0.002231	-1e-06
MafF(bZIP)	HWWGTCAGCAWWTTT	-8.534	-0.006935	-15.53	-14.64	-0.003202	-39.08
At1g76110(ARID)	ATTTAATG	-8.393	-8.4e-05	-18.23	-0.06267	-7.2e-05	0
CEBP:CEBP(bZIP)	NTNATGCAAYMNNHTGMAAY	-8.235	-1.946	-10.25	-10.42	-1.163	-6.309
At4g18890(BZR)	NDBRCACGTGYR	-8.215	-6.002	-4.388	-0.3764	-2.297	-2.6e-05
Pax7(Paired,Homeobox),longest	NTAATTDGCYAATTANNWWD	-8.159	-0.6567	-4.23	-0.08846	-0.003667	-0.06019
ANAC092(NAC)	WRCKTGWNNNWCAMG	-8.147	-0.07584	-0.004798	-6.935	-0.2155	-0.000127
SPL3(SBP)	WDTTGTACGGAH	-8.119	-10.67	-7.522	-9.83	-21.21	-4.733
PRDM10(Zf)	TGGTACATTCCA	-7.888	-0.1359	0	-45.89	-0.005204	0
EFL-1(E2F)	TGCAARYGCGCTCYA	-7.817	-1.858	-8.533	-4.178	-2.363	-3.163
TINY(AP2EREBP)	NNCACCGACA	-7.741	-2.401	-0.04904	-4.47	-4.296	-0.01577
CTCF-SatelliteElement(Zf?)	TGCAGTTCCMVNWRTGGCCA	-7.667	-0.09589	-7.094	-30.93	-0.04167	-21.19
ARF16(ARF)	ATTTTACGAT	-7.556	-40.24	-0.007327	-36.1	-16.69	-13.76
CUC3(NAC)	TRCKTGWNNNACAMG	-7.504	-0.04464	-0.01679	-6.967	-0.5345	-0.001533
ANAC042(NAC)	CGTNDHNDHNACGKY	-7.497	-15.4	-0.7302	-7.122	-24.82	-0.0927
TRP2(MYBrelated)	TAAACCCT	-7.454	-0.03371	-0.000904	-5.933	-0.6826	-3.7e-05
NST1(NAC)	WRCTTRWWNWWYAAG	-7.295	-0.000293	-0.00589	-10.14	-0.000749	-0.000199
bZIP42(bZIP)	GCCACGTCAGCA	-7.283	-6.847	-1.609	-36.79	-4.244	-16.93
HSFC1(HSF)	HTTCTAGAADCTTCT	-7.144	-1.891	-6.138	-16.87	-0.5995	-14.85
IDD7(C2H2)	TTTGTCKTTTTN	-6.998	-0.358	-39.08	-1.775	-0.0198	-5.389
VND1(NAC)	CTTRWDNHWYAAGYW	-6.928	-0.01302	-9.1e-05	-9.366	-0.03841	0
Brachyury(T-box)	ANTTMRCASBNNNGTGYKAAN	-6.798	-1.854	-7.791	-3.675	-0.5116	-3.33
Unknown1	RGGGTAWWWTHGTAA	-6.6	-0.4161	-19.69	-15.34	-1.032	-25.19
EBNA1(EBV-virus)	GGYAGCAYDTGCTDCCCNNN	-6.537	-4.04	-2.06	-7.426	-8.47	-8.756
MYB63(MYB)	BHYACCWACCHH	-6.482	-0.5979	-0.001829	-0.04415	-0.05342	0
TRPS1(Zf)	AGATAAGANN	-6.371	-0.001395	-0.000284	-0.1225	-0.000265	0
ERF9(AP2EREBP)	AWATGGCGGCGG	-6.353	-10.34	0	-1.311	-4.889	0
CUC2(NAC)	TRCKTGTNNNWCAMG	-6.323	-0.0757	-0.006078	-5.351	-0.1296	-0.006996
NAC2(NAC)	TDCTTGNNNNNCAAG	-6.32	-7.9e-05	-1.1e-05	-5.34	-2e-06	0
Zic2(Zf)	CHCAGCRGGRGG	-6.301	-0.2115	-29.08	-30.44	-0.2085	-113.2
Pax7(Paired,Homeobox),long	TAATCHGATTAC	-6.225	-1.372	-0.01527	-1.2e-05	-1.561	-0.9583
REM16(ABI3VP1)	DTTTTTSCCGSMAAA	-6.19	-0.1825	-0.109	-1.075	-2.387	-0.4912
At1g22810(AP2EREBP)	BCACCGACANNN	-6.075	-7.05	-6.443	-2.695	-10.04	-0.1164
MYB49(MYB)	ARKTAGGTRR	-6.008	-1.365	0	-1.583	-0.3413	0
LCL1(MYBrelated)	NAAAATATCTWHWWN	-5.949	-0.03237	-1.172	-10.48	-0.009249	-2.671
ANAC020(NAC)	DVCKTGHNNNDCAAG	-5.908	-0.06135	-0.7664	-2.616	-0.09383	-0.1911
AT5G22990(C2H2)	WCGAHDTCGWHN	-5.89	-0.9901	-7.525	-1.531	-4.066	-17.8
NeuroD1(bHLH)	GCCATCTGTT	-5.875	0	-3.339	-193.4	0	-172.6
NF1:FOXA1(CTF,Forkhead)	WNTGTTTRYTTTGGCA	-5.866	-2.49	-12.02	-43.69	-0.3328	-53.03
AT1G72740(MYBrelated)	NNWWAMCCTAAHWNN	-5.824	-0.2499	-6e-06	-5.431	-0.5429	-0.003345
AT3G60490(AP2EREBP)	NNRCCGACANNNNNN	-5.816	-1.183	-0.005497	-3.698	-2.327	-0.008681
GATA15(C2C2gata)	KATGATCA	-5.813	-0.000358	-0.06712	-4.425	-9e-06	0
At1g19210(AP2EREBP)	HCACCGACCAHN	-5.787	-20.12	-11.89	-30.09	-25.3	-45.54
Fox:Ebox(Forkhead,bHLH)	NNNVCTGWGYAAACASN	-5.779	-3e-05	-0.1896	-59.38	-0.01023	-36.69
Phox2a(Homeobox)	YTAATYNRATTA	-5.729	-0.3348	-10.02	-0.112	-0.004795	-5.449
AT3G10113(MYBrelated)	WNAAATATCWWN	-5.711	-0.04979	-0.04113	-3.327	-0.01138	-0.00102
FAR1(FAR1)	TKNNNYYCACGCGCY	-5.555	-1.887	-4.608	-14.5	-0.8536	-12.49
Phox2b(Homeobox)	TTAATTNAATTA	-5.545	-0.6624	-4.492	-0.0135	-0.006189	-0.7285
Eomes(T-box)	ATTAACACCT	-5.121	-0.004583	-7.229	-0.000138	-0.000296	-1e-06
ANAC053(NAC)	TDCTTGNNNNNCAAG	-5.062	-0.000109	-2.4e-05	-4.304	-2e-06	0
Pax8(Paired,Homeobox)	GTCATGCHTGRCTGS	-5.005	-0.3161	-12.03	-3.962	-1.71	-7.683
CES-1(Homeobox)	AAATTSAATTTN	-4.87	-0.2829	-3.646	-5.39	-0.03929	-1.531
AGL95(ND)	TTCTAGAAGCTTCTA	-4.85	-0.8398	-2.217	-6.958	-0.04654	-2.81
ANAC058(NAC)	TWCTTGTDNNACAAG	-4.823	-0.003971	0	-4.063	-0.000174	0
Srebp1a(bHLH)	RTCACSCCAY	-4.695	-0.006054	-12.77	-12.53	-0.3673	-24.21
Foxf1(Forkhead)	WWATRTAAACAN	-4.65	0	0	-171.7	0	-0.1618
At5g66730(C2H2)	TTTGTCKTTTTK	-4.628	-0.3804	-33.04	-0.6133	-0.5658	-8.472
Nkx2.1(Homeobox)	RSCACTYRAG	-4.598	-0.03672	0	-21.2	-0.000648	0
ASHR1(ND)	NTGGTGAN	-4.538	-0.000634	-0.004369	-22.75	-0.000138	-0.1104
ANAC050(NAC)	WNCTTGNNNNNCAAG	-4.52	-0.001463	-0.00729	-4.356	-0.00132	-0.02049
BPC6(BBRBPC)	YTYTCTCTCTCTCTA	-4.459	-4.606	0	-0.9513	-0.8502	0
MYB41(MYB)	BYTYACCTAA	-4.427	-1.251	-9.778	-0.00162	-2.12	-0.02547
EMB1789(C3H)	TWTTTACCGYND	-4.33	-15.93	-2.34	-4.17	-13.5	-4.243
ZIM(C2C2gata)	ATCSRACGGTYRAGA	-4.162	-6.847	-0.00895	-4.708	-5.889	-0.579
ERF11(AP2EREBP)	RTGGCGGCGG	-4.136	-15.04	-4.2e-05	-6.188	-6.405	-2e-06
RVE1(MYBrelated)	AAATATCT	-4.096	-0.01186	-0.303	-2.755	-0.005594	-2.5e-05
ATHB18(Homeobox)	YCAATSATTG	-4.063	-3.279	-1.751	-0.04685	-0.2206	-0.01098
HSF7(HSF)	TTCTAGAAGCTTCTA	-3.886	-0.4955	-2.911	-8.696	-0.06833	-7.198
Zfp809(Zf)	GGGGCTYGKCTGGGA	-3.84	-0.8093	-16.24	-14.49	-1.861	-22.58
MYB27(MYB)	TACCTAACWT	-3.747	-0.6686	-5.499	-0.003786	-2.74	-0.01084
Tcf4(HMG)	ASATCAAAGGVA	-3.746	-0.000875	-2.47	-5.491	-0.000831	-0.6575
CBF1(AP2EREBP)	YRCCGACATN	-3.693	-3.305	-0.1626	-4.686	-3.202	-0.03444
ZNF416(Zf)	WDNCTGGGCA	-3.639	-0.2642	-1.5e-05	-58.29	-0.3537	-10.73
HNF1b(Homeobox)	GTTAATNATTAA	-3.487	-0.3263	-1.044	0	-0.08657	0
Unknown2	AAACGACGTCGTTTT	-3.486	-0.07243	-7.448	-4.602	-2.526	-17.53
Twist(bHLH)	VCAKCTGGNNNCCAGMTGBN	-3.47	0	0	-0.001528	0	0
ERF3(AP2EREBP)	ATGGCGGCGG	-3.467	-12.95	0	-1.242	-3.546	0
FOXP1(Forkhead)	NYYTGTTTACHN	-3.404	0	0	-90.31	0	-4.345
CRC(C2C2YABBY)	TWATSATA	-3.354	-0.08932	-0.09316	-4.9e-05	-0.000239	-0.008426
CBF4(AP2EREBP)	NRCCGACDWNNNNNN	-3.349	-8.578	-7.674	-5.104	-10.03	-3.903
CDX4(Homeobox)	NGYCATAAAWCH	-3.333	-11.53	-1.547	-6.146	-5.833	-0.1357
ABF1	CGTRNAAARTGA	-3.293	-17.14	-10.11	-3.593	-17.02	-44.41
Tcf7(HMG)	CTTTGATGTGSB	-3.158	-0.000977	-4.438	-16.19	-3.7e-05	-6.77
MGP(C2H2)	TTTTGTCGTTTW	-3.122	-1.1	-5.067	-1.46	-0.1765	-0.1946
Tcfcp2l1(CP2)	NRAACCRGTTYRAACCRGYT	-3.118	-1.129	-2.1	-28.58	-3.615	-45.87
ANAC011(NAC)	TDCTTGYRNNDCAAG	-3.052	-1.2e-05	-0.000122	-2.233	-9.9e-05	0
TSO1(CPP)	RAATTTRAAW	-2.985	-0.4828	-0.02244	-1.263	-0.1457	-2.906
WRKY7(WRKY)	AAAAGTCAACGSHWD	-2.891	-1.25	-0.7797	-2.056	-2.145	-0.105
ZNF322(Zf)	GAGCCTGGTACTGWGCCTGR	-2.879	-8e-06	-16.49	-6.91	-1.5e-05	-23.13
CUC1(NAC)	TACTTGTNNNACAAG	-2.879	-0.008666	0	-5.95	-0.002128	0
AT5G25475(ABI3VP1)	RNNRNCAAGCADNDB	-2.844	-2e-06	0	-24.63	0	-0.001085
NFkB-p65-Rel(RHD)	GGAAATTCCC	-2.828	-7.677	-7	-30.1	-7.331	-29.99
Mouse_Recombination_Hotspot(Zf)	ACTYKNATTCGTGNTACTTC	-2.801	-0.2922	-2.278	-1.659	-0.7635	-3.074
Six4(Homeobox)	TGWAAYCTGABACCB	-2.779	-8.315	-5.426	-14.46	-8.281	-8.498
At5g29000(G2like)	RGAATATTCYHH	-2.739	-1.5e-05	0	-10.29	0	0
Pax7(Paired,Homeobox)	TAATCAATTA	-2.683	-0.005078	-0.02313	-0.028	-4e-05	0
Unknown4	AAAAATACCRMA	-2.621	-0.7942	-1.603	-27.95	-2.157	-45.16
At2g41835(C2H2)	TTTGAAAA	-2.605	-1.905	-3.818	-8.943	-5.454	-52.86
GATA3(Zf),DR8	AGATSTNDNNDSAGATAASN	-2.592	-0.0322	-2e-06	-3.058	-0.8267	-0.01648
RUNX(Runt)	SAAACCACAG	-2.591	-1.553	-0.5582	-90.15	-2.792	-35.48
RORa(NR)	AAWCTAGGTCARDNN	-2.562	-0.07481	-0.09885	-29.39	-0.5022	-52.73
GRHL2(CP2)	AAACYKGTTWDACMRGTTTB	-2.537	-0.9983	0	-23.32	-0.1867	0
MYB39(MYB)	WWAARKTAGGTGRAA	-2.513	-0.1376	-5.872	-0.000473	-0.1356	-0.0139
RORg(NR)	WAABTAGGTCAV	-2.473	-0.1017	-10.95	-23.19	-1.542	-68.31
Pitx1:Ebox(Homeobox,bHLH)	YTAATTRAWWCCAGATGT	-2.465	-0.001201	-2.8	-14.13	-0.003491	-40.48
HSFB4(HSF)	TTCTAGAAGCTTCTA	-2.45	-0.5481	-0.1191	-2.611	-0.2764	-6.191
JKD(C2H2)	TTTTGTCGTTTT	-2.401	-0.3873	-12.18	-1.65	-1.085	-4.769
SPL9(SBP)	BTGTACTT	-2.377	-0.06897	-8.136	-3.302	-0.1591	-10.84
AT1G01250(AP2EREBP)	YCACCGACAHTW	-2.372	-0.746	-1.846	-0.2804	-1.81	-0.1825
Unknown5	GCTGATAASV	-2.249	-1.664	-3.894	-4.591	-2.029	-1.965
DEAR5(AP2EREBP)	NDWTGTCGGTGRWDN	-2.194	-1.334	-3.495	-0.1898	-3.057	-0.1036
MYB121(MYB)	YNTACCTAACWW	-2.19	-0.2335	-1.251	-4.3e-05	-0.6326	-1.8e-05
WRKY17(WRKY)	GCGTTGACTTTT	-2.169	-0.493	-1.368	-0.1684	-2.232	-0.01262
AT5G59990(C2C2COlike)	TCTCAACCGTTCATT	-2.164	-3.081	-0.08636	-3.246	-1.323	-0.2066
p53(p53)	RRCATGYCYRGRCATGYYYN	-2.151	-8.588	-0.01555	-2.594	-6.941	-0.002419
p53(p53)	RRCATGYCYRGRCATGYYYN	-2.151	-8.588	-0.01555	-2.594	-6.941	-0.002419
ANAC013(NAC)	CTTGNNNNNCAAGNA	-2.145	0	0	-1.078	0	0
AT2G20400(G2like)	DNVGAATATTCBNHN	-2.117	-1e-06	0	-2.593	0	0
AT2G01818(PLATZ)	TCTAGAABSTTC	-2.115	-0.6768	-0.0251	-4.203	-0.03601	-2.794
RORgt(NR)	AAYTAGGTCA	-2.099	-0.6961	-2.631	-36.67	-1.103	-70.52
Foxa3(Forkhead)	BSNTGTTTACWYWGN	-2.086	-0.06981	-0.000226	-31.2	-0.07368	-22.32
OBP4(C2C2dof)	WTTHACTTTTTB	-2.057	-3.783	-4.8e-05	-0.01392	-6.336	0
AIL7(AP2EREBP)	KCACRAWTYYCGAGG	-1.971	-5.203	-3.655	-2.042	-2.321	-10.75
bHLH122(bHLH)	NDDCAASTTGHHNWW	-1.97	-0.3452	-3e-06	-12	-0.7176	-0.03041
BZR1(BZR)	NNCRCACGTGCG	-1.928	-0.2349	-0.1441	-0.01359	-0.1993	0
DDF2(AP2EREBP)	GATGTCGRCR	-1.881	-1.857	-0.9514	-4.76	-2.763	-2.761
Ascl1(bHLH)	NNVVCAGCTGBN	-1.855	0	-111.9	-8.327	0	-190
ZNF136(Zf)	YTKGATAHAGTATTCTWGGTNGGCA	-1.853	-0.09008	-1.315	-9.131	-1.542	-3.949
AT5G47660(Trihelix)	AWTTTTACCG	-1.852	-16.81	-1.815	-1.777	-8.82	-1.467
EGL-5(Homeobox)	ATTTAATGGG	-1.792	-0.000169	0	-0.6333	-6.7e-05	0
NUC(C2H2)	HAVAAAACGACAAAA	-1.682	-1.049	-5.441	-0.2325	-0.9827	-1.687
PAX5(Paired,Homeobox)	GCAGCCAAGCRTGACH	-1.66	-0.5343	-1.628	-2.754	-2.081	-3.433
EBF(EBF)	DGTCCCYRGGGA	-1.614	-0.005107	-21.6	-26.67	-0.2049	-66.98
ZNF652	TTAACCCTTTVNKKN	-1.573	-6.823	-1.252	-10.11	-9.99	-0.005638
Duxbl(Homeobox)	TAAYCYAATCAA	-1.55	-14.31	-0.000357	-4.62	-5.139	0
AS2(LOBAS2)	CCGDAAWWHMCGSCG	-1.542	-0.1717	0	-0.07125	-0.1317	0
DEAR3(AP2EREBP)	BCACCGACAWNNNNN	-1.483	-2.499	-3.367	-2.123	-2.889	-2.978
GATA(Zf),IR4	NAGATWNBNATCTNN	-1.482	-0.007138	-1.771	-1.565	-0.1211	-0.1511
HSFA1E(HSF)	TTCTAGAAGCTTCTA	-1.44	-0.2294	-0.3789	-1.932	-0.02967	-1.783
SFP1	DDAAAAATTTTY	-1.372	-0.1871	-0.001265	-5.692	-0.3604	0
DEL1(E2FDP)	TTCCCGCCAA	-1.319	-5.478	-1.002	-1.991	-6.742	-1.241
Zic3(Zf)	GGCCYCCTGCTGDGH	-1.302	-0.1083	-68.77	-18.9	-0.27	-144.4
MYB57(MYB)	TTACCTAACT	-1.272	-7.641	-1.446	-0.000406	-6.834	0
ANAC096(NAC)	TACTTGWNNNWCAAG	-1.201	-1.1e-05	-1e-06	-5.859	-9.4e-05	-8.4e-05
GT1(Trihelix)	TTAACCATGGTTAAD	-1.148	-1.763	-0.35	-0.9171	-12.34	-0.62
DMRT6(DM)	YDGHTACAWTGTADC	-1.132	-0.008836	-7.01	-1.208	-0.132	-12.32
Ik-1	NHTTGGGAATRCC	-1.107	-0.5302	-1.055	-1.099	-0.5921	-1.054
CRF10(AP2EREBP)	DCCGCCGYHA	-1.096	-27.18	0	-0.03199	-22.54	0
ZML1(C2C2gata)	ATCWYRACCGTTSRW	-1.089	-0.06646	-0.03244	-0.5815	-0.8034	-0.7996
ATHB15(HB)	GYAATSATTA	-1.087	-1.474	-9.219	-0.005459	-0.716	-0.05261
At2g03500(G2like)	WWAGAATATTCT	-1.084	-0.003343	0	-12.81	0	0
At1g13300(G2like)	GAATCTWAGATTCYN	-1.069	-0.1482	-2.22	-0.03709	-2.81	-1.507
EIN3(EIL)	ARATTCAATGWATYT	-0.9802	-0.0589	-0.002368	-0.5889	-0.01408	-0.000524
RUNX-AML(Runt)	GCTGTGGTTW	-0.9622	-0.5306	-10.53	-54.47	-1.988	-69.34
AT1G44830(AP2EREBP)	NCCACCGACA	-0.88	-0.03712	-0.4069	-0.2741	-0.1383	-0.01627
ERF1(AP2EREBP)	GGCGGCTR	-0.8167	-1.814	0	-0.3025	-0.1408	0
p73(p53)	NRRRCAWGTCCDGRCATGYY	-0.8068	-8.203	-1.038	-5.855	-6.267	-0.6697
FOXK1(Forkhead)	NVWTGTTTAC	-0.7946	0	0	-105.1	0	-0.4916
PRDM14(Zf)	RGGTCTCTAACY	-0.77	-2.539	-0.000195	-0.1844	-0.3853	-0.0421
PLT1(AP2EREBP)	GCACGAWTYCCGAGG	-0.7588	-0.383	-0.4404	-0.3328	-0.02442	-1.33
PHV(HB)	RTAATSATTA	-0.7437	-0.1398	-3.375	-0.000881	-0.01574	-0.000367
ANAC004(NAC)	WNCTTVYNNNRBAAG	-0.7006	0	0	-3.867	0	0
DMRT1(DM)	TWGHWACAWTGTWDC	-0.6995	-0.01615	-3.797	-2.649	-0.09115	-11.82
ZNF528(Zf)	AGAAATGACTTCCCT	-0.6719	-0.1907	-0.6133	-1.441	-0.003951	-6.376
NTM1(NAC)	ACTTRTARAASAAGT	-0.6684	0	0	-4.958	0	0
Ptf1a(bHLH)	ACAGCTGTTN	-0.6603	0	-15.83	0	0	-0.4085
AT3G25990(Trihelix)	TTAACCATAG	-0.6559	-0.5699	-2.105	-6.949	-0.257	-0.4441
ERF10(AP2EREBP)	RTGGCGGCGG	-0.6519	-5.473	0	-0.1283	-1.25	0
GATA3(Zf)	AGATAASR	-0.6404	-0.007468	-0.000214	-0.0465	-0.003833	0
REST-NRSF(Zf)	GGMGCTGTCCATGGTGCTGA	-0.6391	-0.3915	-1.479	-0.2448	-0.281	-0.3271
PLT3(AP2EREBP)	GCACGNWTHYCGAGG	-0.628	-0.268	-1.733	-0.1974	-0.06406	-0.4252
AT3G10580(MYBrelated)	TACCTAACWNHW	-0.6274	-0.1147	-1.201	0	-0.05477	0
AT1G23810(Orphan)	TTCTAGAAGSTTCTA	-0.6249	-0.6025	-1.576	-1.106	-0.0529	-7.948
Foxo3(Forkhead)	DGTAAACA	-0.5935	0	0	-93.56	0	-0.3158
IDD2(C2H2)	HAVAAAAMGACAAAA	-0.5758	-1.281	-6.009	-0.02487	-0.2784	-0.2832
DREB26(AP2EREBP)	CCACCGACAH	-0.5538	-0.9637	-0.9204	-0.3236	-1.266	-0.1451
HOXA2(Homeobox)	GYCATCMATCAT	-0.549	-7e-06	0	-0.001262	-0.001257	0
MYB44(MYB)	CVGTTWWKTCNGTTA	-0.5207	-0.2029	-2e-06	-1.05	-0.4982	-0.0002
AT2G33550(Trihelix)	TTTAAGGGCAYTTTT	-0.519	-9e-06	0	-0.03045	0	-1.1e-05
Tcf3(HMG)	ASWTCAAAGG	-0.5051	-0.0491	-2.364	-14.09	-0.03908	-26.14
AT4G27900(C2C2COlike)	TCTCVACCGTTSATT	-0.5015	-0.1341	-0.1286	-2.041	-0.3275	-2.092
NTM2(NAC)	CTTRTNNNAYAAGBH	-0.498	0	0	-1.58	-2e-06	0
TCP20(TCP)	GGDCCCAC	-0.4718	-4.817	-0.1371	-1.015	-3.208	-1.903
ZNF382(Zf)	GNCTGTASTRNTGBCTCHTT	-0.446	-8.6e-05	0	-0.02016	-2.1e-05	0
EIL4(EIL)	GATTCAWTGAAT	-0.4296	-0.004024	-0.01566	-0.009119	-0.006133	-5.9e-05
p53(p53)	ACATGCCCGGGCAT	-0.4127	-1.103	-1.227	-2.29	-0.5433	-1.013
ERF73(AP2EREBP)	CCGCCGCC	-0.4066	-3.301	0	-0.06087	-1.17	0
ANAC103(NAC)	AACTTGNWNWNCAAG	-0.4029	-7e-06	0	-0.6431	-6e-06	0
CCA(Myb)	AGATATYTTT	-0.3856	-1e-06	0	-0.7895	0	0
DUX(Homeobox)	BCWGATTCAATCAAN	-0.3613	0	-1.37	-0.08286	0	-1.303
HSFB3(HSF)	TTCTAGAAGMTTHTW	-0.3527	-0.003497	-6.201	-7.604	-0.04815	-24.95
ZNF675(Zf)	ARGAGGMCAAAATGW	-0.3496	-0.08418	-1.23	-1.301	-0.01404	-3.795
FoxL2(Forkhead)	WWTRTAAACAVG	-0.3385	-0.1773	0	-92.87	-0.4411	-43.87
Barx1(Homeobox)	AAACMATTAN	-0.3365	-0.1103	-3.957	-0.000731	-0.006488	-0.004459
Hand2(bHLH)	TGACANARRCCAGRC	-0.3159	-0.000243	-10.16	-5.701	-0.005656	-18.51
HDG7(HB)	WGCATTTAATGC	-0.3051	-0.05164	-0.07966	-0.000331	-9.8e-05	-1.1e-05
HAT5(Homeobox)	DCAATWATTG	-0.3001	-0.08328	-7.527	-2e-06	-0.1738	-0.003866
NFkB-p50,p52(RHD)	GGGGGAATCCCC	-0.2986	0	0	-0.08313	0	0
ERF38(AP2EREBP)	CACCGACA	-0.2804	-1.674	0	-0.5149	-1.81	0
LHY(Myb)	ADAAATATCT	-0.2784	-0.05929	-0.02521	-0.1018	-0.2393	-1.2e-05
Tbet(T-box)	AGGTGTGAAM	-0.2715	-0.6264	-25.1	0	-0.5824	-1.871
IDD5(C2H2)	TTTTGTCTTTTTBTK	-0.2456	0	0	-2.176	0	0
DUX4(Homeobox)	NWTAAYCYAATCAWN	-0.2406	-4.253	-0.000303	-0.4772	-0.08006	0
ERF5(AP2EREBP)	DCMGCCGCCA	-0.2395	-1.467	0	-0.06479	-0.05717	0
TCFL2(HMG)	ACWTCAAAGG	-0.2361	-0.06053	-7.4e-05	-3.059	-0.005252	-5.976
RAV1(RAV)	TWWTTTCTGTTG	-0.2191	0	0	-3.784	0	0
IDD4(C2H2)	TTTGTCTTTWTB	-0.2067	0	0	-2.887	0	0
bHLH130(bHLH)	GCAACTTG	-0.175	-0.3557	-5.5e-05	-2.007	-1.305	-0.09285
GT2(Trihelix)	AMGGTAAAWWWN	-0.169	-0.6177	-0.7759	-0.03603	-0.005266	-0.3362
At5g22890(C2H2)	NSAGGTKWTATCTGD	-0.1604	-0.02687	-3.107	-0.03066	-0.0118	-0.5477
LXRE(NR),DR4	RGGTTACTANAGGTCA	-0.1336	-0.4504	-0.7647	-0.2185	-0.2324	-2.928
OCT:OCT(POU,Homeobox)	YATGCATATRCATRT	-0.1323	-0.3366	0	-2.165	-0.4999	-3e-06
HSF21(HSF)	CTTCTAGAAGMTTYW	-0.131	-0.09936	-15.96	-5.99	-1.512	-34.37
At1g77640(AP2EREBP)	TGTCGGTGGA	-0.1285	-2.117	-7.2	-0.214	-2.858	-2.496
AT4G18450(AP2EREBP)	ATGGCGGCKG	-0.1208	-4.21	0	-0.003	-0.815	0
WRKY46(WRKY)	AAAGTCAACGSN	-0.1183	-0.3619	-0.0915	-0.01245	-0.9105	-0.007276
DAG2(C2C2dof)	WWTTHACTTTTT	-0.1159	-0.1052	0	-0.0511	-0.01869	0
FOXA1:AR(Forkhead,NR)	AGTAAACAAAAAAGAACAND	-0.1154	-0.0233	-2e-06	-2.189	-0.03315	-0.1331
ANAC005(NAC)	WVCTTVTWNHABAAG	-0.1145	-9e-06	0	-2.483	-1.9e-05	0
NFkB-p65(RHD)	WGGGGATTTCCC	-0.1079	-0.1226	-0.01835	-16.92	-0.2345	-15.57
HSFA6A(HSF)	RGAAGNTTCTAGAAN	-0.1079	-0.1772	-0.3461	-2.665	-0.02902	-0.1233
ZKSCAN1(Zf)	GCACAYAGTAGGKCY	-0.09756	-0.3758	-3.2e-05	-0.1015	-0.2934	-0.000968
dHNF4(NR)	GGTCCAAAGTCCAMT	-0.09186	-0.5789	-0.0157	0	-0.9828	-2e-06
ZML2(C2C2gata)	CATCATCATC	-0.08797	0	-0.1419	-0.06946	-2e-06	-0.008863
bHLH80(bHLH)	NNNNDCAASTTGHNN	-0.08357	-0.3996	-4e-06	-4.235	-1.306	-0.06536
GEI-11(Myb?)	CCGACAYYTYACGGG	-0.08335	-0.3509	-5.637	-0.3971	-0.8496	-6.611
At1g69690(TCP)	NHGTGGGGCCCACHW	-0.07314	-5.326	-0.000213	-0.06477	-2.971	-0.005234
RUNX2(Runt)	NWAACCACADNN	-0.06499	-0.8174	-0.01054	-58.27	-2.004	-37.64
Gata4(Zf)	NBWGATAAGR	-0.06469	-0.02988	-0.001942	-0.000964	-0.01846	0
GTL1(Trihelix)	WWTTTACCKY	-0.06446	-4.439	-0.05591	-0.1383	-0.8138	-0.08251
PCF	NNWWWTGGGCYTDDN	-0.06444	-0.06962	0	-0.4947	-0.000147	-2e-05
Gata1(Zf)	SAGATAAGRV	-0.05666	-0.712	-0.000912	-0.0927	-0.9472	-0.005811
ZNF519(Zf)	GAGSCCGAGC	-0.0559	-3e-06	-1.435	-1.187	-1e-06	-20.12
HDG1(Homeobox)	DDYAATTAATGH	-0.05575	-3e-06	-0.1883	0	0	0
Unknown4	CKTCKTCTTY	-0.05531	-1.356	-10.87	-1e-06	-0.4828	-2.103
AT1G76880(Trihelix)	ACGGTAAAAW	-0.05272	-3.349	-0.008196	-1.174	-1.557	-0.4104
CRF4(AP2EREBP)	CGCCGCCA	-0.04615	-2.624	0	-0.000685	-0.4206	0
Cdx2(Homeobox)	GYMATAAAAH	-0.04294	-0.006909	0	-0.00118	-0.008094	0
p63(p53)	NNDRCATGYCYNRRCATGYH	-0.04115	-1.152	-0.2455	-1.122	-3.551	-0.0329
ANAC062(NAC)	TACTTANTNWNYAAG	-0.03258	0	0	-0.5552	0	0
FOXM1(Forkhead)	TRTTTACTTW	-0.03255	-0.00071	0	-37.19	-0.000124	0
FOXA1(Forkhead)	WAAGTAAACA	-0.03028	-0.0001	0	-69.84	-0.001295	-8.842
ZNF41(Zf)	CCTCATGGTGYCYTWYTCCCTTGTG	-0.0278	-1.269	-4.62	-0.05834	-0.3152	-3.534
DREF	AVYTATCGATAD	-0.02257	-0.2301	-0.00287	-0.008012	-2.952	-0.000179
ZNF264(Zf)	RGGGCACTAACY	-0.0211	-0.1353	-0.06965	-0.5191	-0.1137	-0.1156
HOXA1(Homeobox)	TGATKGATGR	-0.01993	-0.000134	0	-0.01518	-0.01172	0
RAR:RXR(NR),DR5	RGGTCADNNAGAGGTCAV	-0.01956	-0.1363	-0.000133	-1e-06	-0.0018	0
AT3G42860(zfGRF)	CGTTGACTTN	-0.01752	-1.093	-2e-06	-3.2e-05	-2.291	-1e-06
AT1G10720(BSD)	TTCTAGAAKCTTCTA	-0.01663	-0.08184	-1.51	-1.322	-0.004606	-11.09
GATA3(Zf),DR4	AGATGKDGAGATAAG	-0.01576	-0.8485	-0.000267	-0.009621	-0.5744	-0.000418
CUX1(Homeobox)	TATCGATNAN	-0.01282	-0.006748	0	0	-2.9e-05	0
ANL2(HB)	CATTAATTGC	-0.0127	-0.000314	-1.946	0	-2e-06	0
FOXA1(Forkhead)	WAAGTAAACA	-0.01086	-2.8e-05	0	-66.65	-0.001318	-16.29
Hnf1(Homeobox)	GGTTAAWCATTAA	-0.009947	-2.404	-0.1826	0	-1.183	-2.7e-05
ERF104(AP2EREBP)	GGCGGCGG	-0.009489	-3.332	-1e-06	-0.00067	-0.9564	0
Gata2(Zf)	BBCTTATCTS	-0.006345	-0.06554	-0.00016	-0.06559	-0.08276	-0.000601
ANAC017(NAC)	TMCTTGNNNNNCAAG	-0.004902	0	0	-0.02234	0	0
Foxa2(Forkhead)	CYTGTTTACWYW	-0.004782	-0.01376	0	-31.34	-0.004615	-23.19
ERF2(AP2EREBP)	GGCGGCTG	-0.004492	-1.196	0	-0.003299	-0.2413	0
ZNF415(Zf)	GRTGMTRGAGCC	-0.004211	-0.1339	-0.1651	-0.01126	-0.6994	-0.917
Ascl2(bHLH)	SSRGCAGCTGCH	-0.003374	-2e-06	-57.39	0	0	-3.688
Gata6(Zf)	YCTTATCTBN	-0.003355	-0.006284	-8.7e-05	-0.000786	-0.004721	-2e-06
ZNF669(Zf)	GARTGGTCATCGCCC	-0.002819	-0.3389	-0.258	-0.000109	-0.2229	-0.02473
caudal(Homeobox)	GGYCATAAAW	-0.002787	-0.953	0	-0.01953	-1.342	0
At2g45680(TCP)	GTGGGNCCCACNDND	-0.002355	-0.3758	-0.1059	-0.02288	-0.4306	-3.413
At1g14580(C2H2)	CASAAAAMGACAAAA	-0.002299	0	0	-0.02706	0	0
ZNF16(Zf)	MACCTTCYATGGCTCCCTAKTGCCY	-0.002267	-0.8812	-3.183	-4e-06	-0.4524	-0.1425
AT5G61620(MYBrelated)	CTTATCCA	-0.002123	0	0	-0.04928	-1e-06	0
At1g49010(MYBrelated)	RGATAASNTT	-0.002086	0	0	-0.002464	0	0
At3g11280(MYBrelated)	GATAAGRT	-0.001494	-0.1152	0	-4e-06	-0.4003	0
WRKY11(WRKY)	SCGTTGACTTTN	-0.001267	-0.366	-0.002647	-6e-06	-1.242	-0.003048
At5g05790(MYBrelated)	AYCTTATC	-0.001258	-0.1236	0	-9e-06	-0.2218	0
Gli2(Zf)	YSTGGGTGGTCT	-0.001169	0	0	-4.835	0	-1.7e-05
WRKY30(WRKY)	CGTTGACTTN	-0.001141	-2.791	0	-0.000509	-2.941	0
GLI3(Zf)	CGTGGGTGGTCC	-0.00112	-0.129	-0.05222	-0.5373	-0.1175	-0.2009
AT1G19040(NAC)	CTTGNDNHNCAAGYW	-0.00089	0	0	-0.01415	0	0
PQM-1(?)	ACTGATAAGA	-0.000602	-0.01405	0	0	-0.06605	0
WRKY22(WRKY)	WWAAAGTCAACK	-0.000247	-0.09639	-1.5e-05	0	-0.04933	0
LEP(AP2EREBP)	CDCCGCCGTC	-0.000194	-0.02573	0	0	-4.9e-05	0
Tbx6(T-box)	DAGGTGTBAA	-0.000171	-0.0773	-21.35	0	-0.002215	0
Unknown1(NR	MYGGTCACACTG	-0.000164	-0.1055	-1.011	-1.191	-0.4864	-33.39
PUCHI(AP2EREBP)	GCGCCGTY	-0.000162	-4.41	0	0	-1.963	0
ZNF692(Zf)	GTGGGCCCCA	-0.000136	-0.009911	-0.1292	-0.002351	-0.002716	-2.057
AT4G00250(GeBP)	WDTGGATAAKRT	-0.000117	-0.1188	-1.3e-05	-0.02335	-0.2434	0
PSE(SNAPc)	WAVTCACCMTAASYDAAAAG	-0.000105	-0.001776	0	-0.01782	-0.00146	0
WRKY47(WRKY)	WAAGTCAACGBT	-8.9e-05	-2.779	-9e-06	0	-2.328	-1e-05
Cux2(Homeobox)	HNRAATCAAT	-5.9e-05	-0.003849	0	0	-0.002544	0
WRKY8(WRKY)	CGTTGACTTT	-3.9e-05	-0.009832	-0.03308	0	-0.0246	-0.003831
WRKY21(WRKY)	DCGTTGACTTTT	-2.7e-05	-0.1388	-0.01775	0	-0.2497	-0.00033
ZNF165(Zf)	AAGGKGRCGCAGGCA	-1.6e-05	-0.000598	-0.03619	0	-0.02122	-0.01868
At5g47390(MYBrelated)	CTTATCCA	-9e-06	0	0	-0.01815	0	0
ESE1(AP2EREBP)	GGCGGCGG	-7e-06	-0.642	0	-1e-06	-0.08963	0
ZFP3(Zf)	GGGTTTTGAAGGATGARTAGGAGTT	-5e-06	0	-0.04997	-0.2647	-0.8055	-4.823
At1g19000(MYBrelated)	WWTGGATAADDT	-4e-06	-0.001519	0	-3e-06	-0.02164	0
FUS3(ABI3VP1)	DNNWTNTGCATGKNN	-3e-06	0	-2e-06	-2.1e-05	0	0
HEB(bHLH)	VCAGCTGBNN	-3e-06	0	-45.48	0	0	-12.29
At1g72010(TCP)	GGDCCCAC	-2e-06	-1.072	-1.6e-05	-0.01904	-1.018	-0.1224
Reverb(NR),DR2	GTRGGTCASTGGGTCA	-2e-06	-0.000391	-0.002408	0	-0.000366	-1.5e-05
Tbx21(T-box)	AGGTGTGAAA	-1e-06	-0.6015	-1.829	0	-0.01647	-1.1e-05
HOXA3(Homeobox)	ATGATTGATGGS	0	-0.01855	-3.618	0	-0.1016	-0.987
WRKY15(WRKY)	VGTTGACTWW	0	-2.577	0	0	-0.2333	0
BANP(?)	TCTCGCGAGANY	0	-103.5	-10.08	0	-102.3	-5.713
AT5G56840(MYBrelated)	TGGATAAGGT	0	-0.006962	0	-2e-06	-0.03363	0
POU4F3(POU,Homeobox)	TRAATAATTTAT	0	-0.001066	-63.51	0	-0.01696	-12.14
Nr5a2(NR)	BTCAAGGTCA	0	0	0	0	0	0
ZNF410(Zf)	CATCCCATAATAHTC	0	-2.746	-36.45	0	-7.898	-4.548
ERE(NR),IR3	VAGGTCACNSTGACC	0	-1.4e-05	0	0	-3e-06	0
AP-2gamma(AP2)	SCCTSAGGSCAW	0	0	0	0	0	0
FXR(NR),IR1	AGGTCANTGACCTB	0	-1e-06	0	0	-7e-06	0
MYRF(MYRF)	AGTGCCTGGCAC	0	-0.155	-284.1	0	-0.7567	-214.6
hINR(CPE)	SBCABW	0	-25.77	-42.35	0	-30.38	-155.1
Zscan4c(Zf)	ATRTGTGCAC	0	-42.83	-1.2e-05	0	-38.25	0
cTATA(CPE)	TATAWAWS	0	-15.02	-14.23	0	-10.18	-31.6
WRKY6(WRKY)	NCGTTGACTWWD	0	-0.4297	0	0	-0.02283	0
PPARE(NR),DR1	TGACCTTTGCCCCA	0	0	0	0	0	0
HAP3(CCAATHAP3)	TGATGGAW	0	-0.000693	-1.2e-05	0	-0.000151	0
THRb(NR)	GGTCACCTGAGGTCA	0	0	0	0	0	0
WRKY20(WRKY)	CKTTGACYWD	0	-4.1	0	0	-2.521	0
M1BP(Zf)	CAGTGTGACCGT	0	-0.1461	-6e-06	-0.001682	-0.2771	-7.723
TCP1(TCP)	GGGGGCCCMMCN	0	-3e-06	0	0	0	0
ZNF711(Zf)	AGGCCTAG	0	0	0	0	0	0
TCP3(TCP)	WGTGGTCCCAAHWWW	0	0	0	0	0	0
HNF4a(NR),DR1	CARRGKBCAAAGTYCA	0	0	0	0	0	0
NGA4(ABI3VP1)	TKNTCAGGTG	0	0	0	0	0	0
Nur77(NR)	TGACCTTTNCNT	0	-0.000134	0	0	-0.03407	0
Esrrb(NR)	KTGACCTTGA	0	0	0	0	0	0
WRKY24(WRKY)	CGTTGACTWW	0	-0.6289	0	0	-0.1261	0
ERRg(NR)	GTGACCTTGRVN	0	0	0	0	0	0
SF1(NR)	CAAGGHCANV	0	0	0	0	0	0
EBF1(EBF)	GTCCCCWGGGGA	0	0	0	-0.04846	0	-0.08828
Gsx2(Homeobox)	CTAATTAGSN	0	-33.65	-290.3	0	-20.32	-87.91
WRKY3(WRKY)	NCKTTGACYDDN	0	-4.515	0	0	-2.418	0
Emx2(Homeobox)	NVCTAATTAG	0	-17.27	-180.1	0	-9.177	-43.8
VDR(NR),DR3	ARAGGTCANWGAGTTCANNN	0	-1e-06	0	0	-6.5e-05	0
TATA-Box(TBP)	GSCTWTAAAAGG	0	-110.2	-143.6	0	-152.3	-188
SCRT1(Zf)	GCAACAGGTG	0	-3e-06	0	0	-7e-06	0
WRKY33(WRKY)	CGTTGACYAW	0	-3.455	0	0	-2.354	0
SOX1(HMG)	CCATTGTTCB	0	0	-329.1	0	0	-23.25
WRKY27(WRKY)	NHGTTGACYTWD	0	-0.948	0	0	-0.1039	0
Zac1(Zf)	HAWGRGGCCM	0	0	0	0	0	0
WRKY28(WRKY)	BGTTGACTWH	0	-0.4571	0	0	-0.02564	0
SHN3(AP2EREBP)	CCGCCGCC	0	-0.01915	0	0	-0.001495	0
Hoxd9(Homeobox)	RTGATTTATGGY	0	-1.334	-5.507	0	-0.774	-9.262
Hoxc10(Homeobox)	CMATAAATCA	0	-2.963	-7.114	0	-0.7146	-0.7619
WRKY29(WRKY)	MGTTGACTTT	0	-0.9289	0	0	-0.01613	0
AP-2alpha(AP2)	ATGCCCTGAGGC	0	0	0	0	0	0
WRKY25(WRKY)	NNNNHRGTCAAMNNN	0	-3.719	0	0	-0.6472	0
polyAsite	TTCAATAAAG	0	-0.005777	-1.333	0	-4.1e-05	-3.75
Zelda(Zf)	KBCTACCTGW	0	0	0	0	0	0
THRa(NR)	GGTCANYTGAGGWCA	0	0	0	0	0	0
SpliceDonor	MAGGTAAGTN	0	0	0	0	0	0
TCP17(TCP)	GTGGTCCCCA	0	-0.004415	0	-0.000111	-0.01317	-0.00545
ZFX(Zf)	AGGCCTRG	0	0	0	0	0	0
Snail1(Zf)	TRCACCTGCY	0	0	0	0	0	0
LRF(Zf)	AAGACCCYYN	0	0	0	0	0	0
WIP5(C2H2)	TDTTCTCMAGGT	0	-3e-06	0	0	0	0
RARa(NR)	TTGAMCTTTG	0	0	0	0	0	0
WRKY43(WRKY)	NCGTTGACTTTT	0	-0.8197	0	0	-0.3449	0
HNF6(Homeobox)	NTATYGATCH	0	-0.02902	0	0	-0.02973	0
AT1G04880(ARID)	AAACTATATADTATA	0	0	0	-3.6e-05	-0.000142	-1e-06
E2A(bHLH)	DNRCAGCTGY	0	0	-30.13	0	0	-0.007881
At1g74840(MYBrelated)	YHTTATCCAWWT	0	-0.000174	0	-0.000308	-0.000121	0
EAR2(NR)	NRBCARRGGTCA	0	0	0	0	0	0
Erra(NR)	CAAAGGTCAG	0	0	0	0	0	0
Slug(Zf)	SNGCACCTGCHS	0	0	0	0	0	0
WRKY65(WRKY)	AWWWAGTCAACG	0	-0.05646	0	0	-0.000268	0
TCP7(TCP)	GTGGGSCCCACHHNN	0	-1.259	-5e-06	-0.002184	-0.6577	-1.1e-05
WRKY45(WRKY)	HNNNKTTGACTWWNH	0	-0.1476	0	0	-0.01004	0
WRKY14(WRKY)	NCGTTGACTTTN	0	-0.05315	0	0	-0.006708	0
At5g08330(TCP)	GGRCCCAC	0	-0.4486	0	0	-0.331	-0.005257
FXR(NR),ER2	NTGACCYMKRGGTCA	0	0	0	0	0	0
AT4G12670(MYBrelated)	AGGGTTTAGGGTTTA	0	0	0	0	0	0
PPARa(NR),DR1	VNAGGKCAAAGGTCA	0	0	0	0	0	0
ZNF91(Zf)	RGCMGCCTYC	0	-7.595	-220.5	0	-6.316	-231.6
THRb(NR)	TRAGGTCA	0	0	0	0	0	0
Klf15(Zf)	RGGGGGCGGGGC	0	-2956	-3067	0	-3015	-3625
RAR:RXR(NR),DR0	AGGTCAAGGTCA	0	0	0	0	0	0
At4g38000(C2C2dof)	WWWTWACTTTTT	0	-0.3289	0	0	-0.2285	0
COUP-TFII(NR)	AGRGGTCA	0	0	0	0	0	0
Bcl11a(Zf)	TYTGACCASWRG	0	-0.403	-9e-06	-7.295	-1.053	-49.49
WRKY75(WRKY)	CGTTGACTWW	0	-2.99	0	0	-0.9151	0
CTCF(Zf)	RTGGCGCCATCTAGCGGHCA	0	-60.73	-578.8	0	-73.45	-756.5
Inr	VBBCADDNN	0	-38.22	-86.19	0	-24.29	-136.3
ZEB1(Zf)	VCAGGTRDRY	0	0	0	0	0	0
WRKY18(WRKY)	NNNTTGACYWNNNNN	0	-3.823	0	0	-0.3718	0
Zfp541(Zf)	NRSCWCGYGC	0	-9.007	0	0	-7.231	0
RXR(NR),DR1	TAGGGCAAAGGTCA	0	0	0	0	0	0
E2A(bHLH),near_PU.1	NVCACCTGBN	0	0	0	0	0	0
AT3G51470(DBP)	TTWHGGTGCACC	0	0	0	0	0	0
EBF2(EBF)	NABTCCCWDGGGAVH	0	0	0	-0.03279	0	-0.9278
Gli3(Zf)	RGACCACCCASR	0	0	-1.1e-05	0	0	-0.1703
WRKY26(WRKY)	CGTTGACTWDKN	0	-0.000594	0	0	-0.001341	0
SpliceAceptor/Homer	TYYYYRCAGG	0	-0.8317	-11.09	0	-0.04171	-6.897
Hoxc6(Homeobox)	CMATYAATCW	0	-0.0499	-14.12	0	-0.002736	0
WRKY50(WRKY)	NNTTGACTWNNGNNN	0	-0.04765	0	0	-0.000842	0
HINFP(Zf)	TWVGGTCCGC	0	-0.8504	0	-0.001705	-1.172	0
ELT-3(Gata)	AWTGATAAGA	0	-1e-06	0	0	0	0
TR4(NR),DR1	GAGGTCAAAGGTCA	0	-0.01129	0	0	-6.5e-05	0
WRKY42(WRKY)	NAAAGTCAACGN	0	-1.016	0	-0.000702	-0.5517	0
TCP16(TCP)	GTGGDCCYNNNNNNN	0	0	0	0	0	0
MRE(NR)	GGAACAGAVTGTCCT	0	0	-59.1	0	0	-81.01
Nr5a2(NR)	BTCAAGGTCA	0	0	0	0	0	0
COUP-TFII(NR)	GKBCARAGGTCA	0	0	0	0	0	0
DPR(core promoter)	GGVMGGACGBR	0	-157.6	-522.4	0	-178.4	-551.2
ZBED2(Zf)	NRGTTTCGGK	0	-0.000474	0	0	-0.001741	0
WRKY31(WRKY)	NCGTTGACTWWK	0	-0.2461	0	0	-0.01632	0
Atoh7(bHLH)	KRRCAGCTGGTS	0	-0.2283	-135	0	-0.5746	-540.9
WRKY71(WRKY)	CKTTGACYWW	0	-0.16	0	0	-0.003945	0
hTCT(CPE)	BCKTTCTYTTY	0	-0.003707	-20.41	0	-0.001102	-25.51
At5g58900(MYBrelated)	WWWTYTTATCTWWWW	0	0	0	0	0	0
PTF1(TCP)	RDDGGGACCACA	0	0	0	-1e-06	0	0
RARg(NR)	AGGTCAAGGTCA	0	0	0	0	0	0
At5g08520(MYBrelated)	ADBSTTATCY	0	-0.03535	0	0	-0.242	0
NLP7(RWPRK)	TGRCCYTTCR	0	-4.408	0	0	-5.509	0
NFATC2(RHD)	WTTTTCCATTGS	0	-0.01162	-5.141	0	-0.06119	-45.99
WRKY40(WRKY)	AHWAGTCAAC	0	-0.8913	0	0	-0.02925	0
Hoxc13(Homeobox)	TTTTATKRGN	0	-12.09	-0.06281	0	-7.887	-0.01392
Hnf6b(Homeobox)	TATTGAYY	0	-0.00342	0	0	-0.001456	0
ZEB2(Zf)	GNMCAGGTGTGC	0	0	0	0	0	0
WRKY55(WRKY)	NCGTTGACTT	0	-2.465	0	0	-0.2027	0
