# Supplementary material for: Glucocorticoid Receptor-Regulated Enhancers Play a Central Role in the Gene Regulatory Networks Underlying Drug Addiction
Source: Front Neurosci. 2022 May 16;16:858427. doi: 10.3389/fnins.2022.858427 (PMC9149415; doi:10.3389/fnins.2022.858427)
Supplement: Supplementary Table S3 — Differential TSRs. [file Table_3.xlsx]

## Sheet: PFC Differential TSRs
TSRs	Chr	Start	End	Strand	Peak Score	Focus Ratio/Region Size	Annotation	Detailed Annotation	Distance to TSS	Nearest PromoterID	Entrez ID	Nearest Unigene	Gene Type	PFC-Naive-r1 (rlog)	PFC-Naive-r2 (rlog)	PFC-Oxy-r1 (rlog)	PFC-Oxy-r2 (rlog)	PFC-Coc-r1 (rlog)	PFC-Coc-r2 (rlog)	naive vs. oxy Log2 Fold Change	naive vs. oxy p-value	naive vs. oxy adj. p-value	naive vs. coc Log2 Fold Change	naive vs. coc p-value	naive vs. coc adj. p-value
chr10-673	chr10	53711671	53711821	-	235.7	0.864	promoter-TSS (XM_006246610.4)	mRNA-promoter-TSS (XM_006246610.4)	32	XM_006246612.4	Pfas	XM_006246612	mRNA	4.53154	4.90533	8.0797	7.32467	8.5675	4.69306	5.14525	3.35826e-23	1.84919e-18	5.17968	0.0171252	0.99998
chr10-1293	chr10	53711825	53711975	+	96.8	0.869	promoter-TSS (XM_006246610.4)	mRNA-promoter-TSS (XM_006246610.4)	-89	XM_006246611.4	Pfas	XM_006246612	mRNA	3.94876	4.26669	6.93776	6.50171	6.53502	4.09068	5.55268	5.92715e-17	1.63186e-12	4.3106	0.0589902	0.99998
chr6-352	chr6	69134005	69134155	-	237.8	0.887	promoter-TSS (NM_001029897.3)	mRNA-promoter-TSS (NM_001029897.3)	17	XM_006240076.3	Strn3	XM_006240075	mRNA	6.45377	6.19121	8.00257	8.21353	6.5984	8.13357	2.598	1.54237e-14	2.83097e-10	1.92085	0.00104728	0.99998
chr1-740	chr1	77749676	77749826	-	292.6	0.701	promoter-TSS (NM_001388512.1)	mRNA-promoter-TSS (NM_001388512.1)	7	NM_001388512.1	Hif3a	NM_001388512	mRNA	8.2912	8.352	6.15809	6.78079	8.12312	8.21453	-2.64963	5.13922e-13	7.07465e-09	-0.19411	0.564267	0.99998
chr16-205	chr16	22238396	22238546	-	260.3	0.967	promoter-TSS (NM_001037315.1)	mRNA-promoter-TSS (NM_001037315.1)	6	XM_039094151.1	Nat1	XM_017599977	mRNA	6.66319	6.48651	8.04803	8.33495	6.89009	8.33892	2.33189	1.42018e-12	1.56402e-08	1.84045	0.000889378	0.99998
chr5-715	chr5	32803566	32803716	+	146.1	0.997	intron (NM_001271238.1, intron 3 of 17)	mRNA-intron (NM_001271238.1, intron 3 of 17)	56653	NM_001271238.1	Cngb3	NM_001271238	mRNA	5.71352	5.2724	6.9447	7.70968	6.17899	7.41342	3.01444	1.19675e-10	1.0983e-06	2.41888	8.64687e-05	0.206112
chr20-421	chr20	6575053	6575203	-	101.7	0.931	exon (XM_006256224.4, exon 1 of 12)	mRNA-exon (XM_006256224.4, exon 1 of 12)	276	XM_006256224.4	Fkbp5	XM_039098819	mRNA	7.14267	6.58581	5.05603	5.35248	6.04469	6.35622	-2.93009	5.05777e-10	3.97859e-06	-1.02216	0.0266029	0.99998
chr1-1585	chr1	77747443	77747593	-	129.1	0.987	intron (XM_039089538.1, intron 1 of 14)	mRNA-intron (NM_001388512.1, intron 1 of 14)	2240	NM_001388512.1	Hif3a	NM_001388512	mRNA	7.27653	7.12728	5.47635	5.8796	6.81037	6.71706	-2.46258	2.29929e-09	1.5826e-05	-0.629319	0.10992	0.99998
chr1-1919	chr1	84935024	84935174	+	100	0.998	Intergenic	Intergenic	15401	XM_008759211.3	LOC103689966	XM_008759211	mRNA	5.34799	4.94305	6.5334	7.04672	5.57617	6.7788	2.8742	3.4278e-09	2.0972e-05	2.1613	0.00148636	0.99998
chr10-1657	chr10	73962002	73962152	-	65	0.997	Intergenic	Intergenic	-52919	XR_005490416.1	LOC120095173	XR_005490416	lnc_RNA	4.52416	4.18538	5.73429	6.35518	4.87738	6.25465	3.72964	5.11377e-09	2.81585e-05	3.23897	0.000121746	0.243127
chr14-616	chr14	5339395	5339545	-	68.6	0.553	Intergenic	Intergenic	-24350	NM_012881.2	Spp1	NM_012881	mRNA	6.0186	5.85467	3.93819	4.02654	6.33771	6.00269	-8.88719	6.8658e-09	3.4369e-05	0.384763	0.398365	0.99998
chr1-2394	chr1	77748782	77748932	+	71.6	0.653	intron (XM_039089538.1, intron 1 of 14)	mRNA-intron (NM_001388512.1, intron 1 of 14)	901	NM_001388512.1	Hif3a	NM_001388512	mRNA	6.37015	6.23619	4.29497	4.90898	5.69831	5.964	-3.42978	1.16303e-08	5.33674e-05	-0.72472	0.115691	0.99998
chr5-803	chr5	113483056	113483206	+	126.6	0.999	Intergenic	Intergenic	-17605	XR_005504442.1	Kank4	XR_005504442	transcript	5.72929	5.2897	6.68574	7.46609	6.05282	7.23241	2.62354	5.08098e-08	0.000215215	2.13148	0.000551337	0.779717
chr15-234	chr15	70237441	70237591	-	197.7	0.77	promoter-TSS (XM_008770867.3)	mRNA-promoter-TSS (XM_008770867.3)	12	XM_039093368.1	Pcdh9	XM_017599711	mRNA	6.59353	6.19361	7.80144	7.62782	7.01489	7.85457	1.94948	8.41131e-08	0.000330829	1.66973	0.000728167	0.903066
chr7-172	chr7	133592457	133592607	+	555.4	0.981	promoter-TSS (NM_001008379.1)	mRNA-promoter-TSS (NM_001008379.1)	21	NM_001008379.1	Prr13	NM_001008379	mRNA	8.12288	8.18036	9.12396	9.23525	8.54534	9.39073	1.37913	1.77244e-07	0.000650649	1.20624	0.00314174	0.99998
chr3-842	chr3	119939392	119939542	+	136.1	0.72	exon (XM_008762239.3, exon 1 of 3)	mRNA-exon (XM_008762239.3, exon 1 of 3)	593	XM_008762239.3	Shld1	XM_008762239	mRNA	7.5218	7.14598	6.00209	6.17678	6.54535	6.4351	-1.93637	3.09642e-07	0.00106563	-1.26445	0.00236068	0.99998
chr4-412	chr4	32563726	32563876	+	216.8	0.823	promoter-TSS (NM_053356.2)	mRNA-promoter-TSS (NM_053356.2)	-137	NM_053356.2	Col1a2	NM_053356	mRNA	6.52643	6.55346	7.48514	8.1035	6.87134	8.1903	1.89499	4.27569e-07	0.00138492	1.73334	0.00120711	0.99998
chr2-966	chr2	206528818	206528968	-	95.8	0.996	intron (XR_005501240.1, intron 4 of 7)	lnc_RNA-intron (XR_005501240.1, intron 4 of 7)	-40370	XR_005501242.1	LOC120100932	XR_005501242	lnc_RNA	5.41768	5.10391	6.2082	7.19213	5.43857	6.60059	2.58896	7.24776e-07	0.00221717	1.63678	0.0153296	0.99998
chr1-295	chr1	79356628	79356778	-	568.4	0.78	promoter-TSS (NM_001270681.1)	mRNA-promoter-TSS (NM_001270681.1)	31	NM_001270682.1	Apoe	NM_138828	mRNA	8.02294	8.00703	9.51833	8.80364	9.40947	8.63567	1.61178	8.80999e-07	0.00255323	1.44954	0.00026827	0.432044
chr14-681	chr14	79257545	79257695	-	47.6	0.657	intron (NM_001017501.1, intron 9 of 9)	mRNA-intron (NM_001017501.1, intron 9 of 9)	42290	NM_001017501.1	Hormad2	XM_008770342	mRNA	3.7104	3.70819	5.07479	5.03206	6.13248	5.36019	7.84451	1.08531e-06	0.00298809	9.12426	5.55189e-09	6.92945e-05
chr20-231	chr20	45764484	45764634	-	201.7	0.908	promoter-TSS (NM_001106395.1)	mRNA-promoter-TSS (NM_001106395.1)	-28	XM_039098617.1	Foxo3	XM_039098617	mRNA	6.59234	6.79936	7.75596	7.77519	7.15595	7.70077	1.56119	2.5984e-06	0.0061935	1.14341	0.00948037	0.99998
chr20-57	chr20	30434389	30434539	+	628.3	0.677	promoter-TSS (NM_001007740.1)	mRNA-promoter-TSS (NM_001007740.1)	-198	XM_039098876.1	Vps26a	XM_039098876	mRNA	9.40951	9.23495	8.11263	8.4994	9.53465	9.0141	-1.34489	2.69948e-06	0.0061935	-0.0243364	0.944892	0.99998
chr5-2520	chr5	109931875	109932025	-	20	0.791	TTS (XR_005504871.1)	lnc_RNA-TTS (XR_005504871.1)	31609	XR_005504886.1	LOC100911221	XR_005504878	lnc_RNA	3.0737	3.07258	4.24279	4.24613	4.27171	3.16368	7.66713	2.46329e-06	0.0061935	6.79456	0.0735801	1
chr9-689	chr9	83605556	83605706	-	75.6	0.993	exon (NM_012969.2, exon 1 of 2)	mRNA-exon (NM_012969.2, exon 1 of 2)	166	NM_012969.2	Irs1	NM_012969	mRNA	5.0443	4.68155	6.12615	6.22105	5.09676	6.68944	2.48712	2.50566e-06	0.0061935	2.46742	0.00120529	0.99998
chr10-2155	chr10	36139373	36139523	-	41.8	0.956	Intergenic	Intergenic	-7310	XM_039087188.1	RGD1560689	XM_039087188	mRNA	5.47647	5.59299	4.30225	4.38249	4.94672	4.63532	-2.71272	3.6081e-06	0.00781094	-1.41838	0.0136864	0.99998
chr13-241	chr13	67585854	67586004	-	203.2	0.544	promoter-TSS (NM_001105992.1)	mRNA-promoter-TSS (NM_001105992.1)	21	XM_039090615.1	Xpr1	XM_039090615	mRNA	6.44514	6.30667	7.31839	7.65106	6.6289	7.77385	1.68291	3.82292e-06	0.00781094	1.47069	0.00572174	0.99998
chr4-1103	chr4	178259295	178259445	-	61.8	0.997	Intergenic	Intergenic	17131	XR_005504059.1	LOC120102431	XR_005504059	lnc_RNA	4.71156	4.57769	5.60878	6.25082	4.6433	6.2419	2.65287	3.83e-06	0.00781094	2.23296	0.00717342	0.99998
chr20-474	chr20	6575589	6575739	-	85.6	0.797	promoter-TSS (XM_006256224.4)	mRNA-promoter-TSS (XM_006256224.4)	-260	XM_006256224.4	Fkbp5	XM_039098819	mRNA	6.5974	6.47867	5.19894	5.50111	6.38372	5.94263	-2.09667	4.38779e-06	0.00862889	-0.548889	0.23384	0.99998
chr4-17	chr4	87612185	87612335	+	2023.9	0.906	promoter-TSS (NM_001107863.1)	mRNA-promoter-TSS (NM_001107863.1)	56	NM_001107863.1	Ppm1k	NM_001107863	mRNA	10.1452	9.33446	10.8961	10.9605	10.4439	11.5316	1.44841	6.26085e-06	0.0118879	1.67981	0.041104	0.99998
chr15-109	chr15	16906878	16907028	-	367.5	0.749	promoter-TSS (NM_001007680.1)	mRNA-promoter-TSS (NM_001007680.1)	17	NM_001007680.1	Abhd6	XM_039093251	mRNA	7.43049	7.2681	8.18749	8.51902	8.83259	8.74416	1.4222	6.82194e-06	0.0123594	1.99036	1.21494e-08	8.66512e-05
chr1-747	chr1	77743639	77743789	+	289	0.986	exon (NM_001388512.1, exon 2 of 15)	mRNA-exon (NM_001388512.1, exon 2 of 15)	309	NM_022528.3	Hif3a	NM_001388512	mRNA	8.3411	8.34407	7.31933	7.4701	7.80803	7.80407	-1.31895	6.95813e-06	0.0123594	-0.726252	0.0348866	0.99998
chr7-370	chr7	12074530	12074680	+	317.8	0.786	promoter-TSS (NM_182823.2)	mRNA-promoter-TSS (NM_182823.2)	-18	NM_182823.2	Zfp472	NM_182823	mRNA	7.39505	7.50557	8.3973	8.38629	7.44318	8.52604	1.30186	7.19237e-06	0.0123763	0.925199	0.0505998	0.99998
chr20-53	chr20	6580921	6581071	-	649.1	0.816	Intergenic	Intergenic	-5592	XM_006256224.4	Fkbp5	XM_039098819	mRNA	9.64065	9.43721	7.87883	8.72109	8.66278	9.30216	-1.54887	7.83999e-06	0.0130819	-0.664281	0.0721153	0.99998
chr2-170	chr2	173675955	173676105	+	552.5	0.983	promoter-TSS (XR_005501073.1)	lnc_RNA-promoter-TSS (XR_005501073.1)	19	XR_005501073.1	LOC100911992	XR_005501075	lnc_RNA	8.3695	8.00264	9.03751	9.30255	8.23717	9.42905	1.30357	8.35436e-06	0.0135301	1.05176	0.0250284	0.99998
chr1-6646	chr1	182638083	182638233	+	11.9	0.984	exon (XR_005499477.1, exon 1 of 2)	lnc_RNA-exon (XR_005499477.1, exon 1 of 2)	998	XR_005499479.1	LOC120099939	XR_005499479	lnc_RNA	3.48216	3.39404	2.39369	2.41644	2.49294	2.42028	-7.37366	8.96623e-06	0.0141062	-5.64413	0.000706188	0.903066
chr3-487	chr3	154061079	154061229	-	261.8	0.785	promoter-TSS (NM_001134955.1)	mRNA-promoter-TSS (NM_001134955.1)	3	NM_001134955.1	Elmo2	NM_001134955	mRNA	7.16482	6.8841	7.75733	8.59269	6.82316	8.15957	1.69845	1.01195e-05	0.0154784	0.930592	0.084589	0.99998
chr20-433	chr20	27915046	27915196	+	97.7	0.893	Intergenic	Intergenic	-21033	NM_080906.2	Ddit4	NM_080906	mRNA	6.19819	6.23504	4.72967	5.23185	6.03976	5.51652	-2.31258	1.09613e-05	0.0163127	-0.660881	0.184459	0.99998
chr20-462	chr20	4931594	4931744	-	87	0.637	promoter-TSS (NM_033097.2)	mRNA-promoter-TSS (NM_033097.2)	8	XR_005497175.1	Vps52	XR_005497175	transcript	6.69414	6.50592	4.96969	5.63719	5.72158	6.25734	-2.18471	1.23405e-05	0.017882	-0.907136	0.0578822	0.99998
chr5-810	chr5	5836945	5837095	-	124.2	0.894	intron (XM_017593660.2, intron 1 of 22)	mRNA-intron (XM_006237744.4, intron 1 of 22)	986	XM_017593660.2	Ncoa2	XM_006237745	mRNA	5.98774	6.02517	6.98205	7.10566	6.02535	7.14359	1.64258	1.58612e-05	0.0223944	1.16657	0.0430943	0.99998
chr3-3934	chr3	107360215	107360365	-	11.7	0.925	intron (XR_005501772.1, intron 3 of 22)	mRNA-intron (NM_001145840.1, intron 3 of 23)	5912	XM_039104243.1	Ganc	XR_005501772	transcript	3.64608	3.1093	2.41981	2.44232	2.63674	2.50822	-7.27943	1.77925e-05	0.0244932	-3.54257	0.00201838	0.99998
chr7-75	chr7	129828323	129828473	-	890.7	0.989	promoter-TSS (NM_001013222.1)	mRNA-promoter-TSS (NM_001013222.1)	-13	NM_001013222.1	Rnd1	NM_001013222	mRNA	8.94684	9.05702	9.75065	9.87875	9.22626	10.0577	1.06506	1.89208e-05	0.0254111	0.939832	0.0166998	0.99998
chr20-498	chr20	6581622	6581772	+	79.4	0.988	Intergenic	Intergenic	-6162	NM_001113777.1	Armc12	NM_001113777	mRNA	6.39794	6.13773	4.75995	5.33121	5.81099	5.90316	-2.2506	2.59399e-05	0.0340084	-0.670762	0.152277	0.99998
chr20-226	chr20	6357672	6357822	-	204	0.27	intron (XM_006256168.4, intron 2 of 6)	mRNA-intron (NM_013141.2, intron 3 of 7)	9421	XR_005497780.1	LOC120098961	XR_005497780	lnc_RNA	6.5882	6.93343	7.7777	7.73235	7.54127	7.51187	1.43694	2.73417e-05	0.0350127	1.12508	0.00638581	0.99998
chr3-1240	chr3	165414991	165415141	+	66	0.929	intron (XM_039105553.1, intron 8 of 12)	mRNA-intron (NM_214459.3, intron 7 of 11)	-23645	XM_039106752.1	LOC120101827	XM_039106752	mRNA	6.10436	6.22807	4.54498	5.22708	5.30327	5.87887	-2.3619	3.11641e-05	0.0381338	-0.888149	0.0864127	0.99998
chr7-2515	chr7	133338385	133338535	-	21.4	0.621	promoter-TSS (XM_006242438.4)	mRNA-promoter-TSS (XM_006242438.4)	-546	XM_039079838.1	Csad	NM_021750	mRNA	4.44799	3.71922	2.94853	2.9907	3.59033	2.99777	-5.32489	3.09673e-05	0.0381338	-2.1975	0.0222641	0.99998
chr14-702	chr14	77696800	77696950	-	56.3	0.661	exon (NM_013052.2, exon 2 of 2)	mRNA-exon (NM_013052.2, exon 2 of 2)	8840	NM_013052.2	Ywhah	NM_013052	mRNA	6.24687	5.21621	4.40996	4.67809	4.87263	5.92869	-2.70854	3.72065e-05	0.0435901	-0.529629	0.438703	0.99998
chr5-1956	chr5	71655909	71656059	-	30.8	0.963	TTS (XM_345535.9)	mRNA-TTS (XM_345535.9)	-8069	XM_003749945.4	Tmem245	XM_216388	mRNA	5.24731	4.32972	3.6279	3.71114	3.52085	4.84992	-3.41199	3.65309e-05	0.0435901	-1.00356	0.605562	0.99998
chrX-570	chrX	12209622	12209772	-	54.4	0.796	exon (NM_001108815.1, exon 7 of 7)	mRNA-exon (NM_001108815.1, exon 7 of 7)	82695	XR_005498321.1	LOC120099251	XR_005498321	lnc_RNA	6.22335	5.19049	4.62906	4.36567	4.2828	5.68223	-2.6487	3.8061e-05	0.0436624	-1.07617	0.476218	0.99998
chr15-6	chr15	24311110	24311260	+	2729.4	0.603	promoter-TSS (unassigned_transcript_1325)	tRNA-promoter-TSS (unassigned_transcript_1325)	-7	unassigned_transcript_1325	Trnay-gua_3	unassigned_transcript_1325	tRNA	11.0751	10.6198	10.0209	10.0477	12.1952	10.7551	-1.08726	4.12584e-05	0.0463644	1.01811	0.228206	0.99998
chr7-431	chr7	129574020	129574170	-	271.8	0.987	intron (XM_039078920.1, intron 2 of 2)	mRNA-intron (XM_039078920.1, intron 2 of 2)	4781	NM_001000424.1	Olr1107	XM_006242320	mRNA	7.80233	7.68585	6.36551	6.94733	9.05288	7.14444	-1.54086	4.61133e-05	0.0497878	0.936785	0.397863	0.99998
chr8-1707	chr8	103572120	103572270	+	32.3	0.994	Intergenic	Intergenic	15975	XR_005488425.1	LOC102549824	XR_005488424	lnc_RNA	4.03728	3.7396	4.72223	5.31414	4.01686	4.97071	3.12494	4.57585e-05	0.0497878	2.21713	0.0315769	0.99998
chr1-2261	chr1	112009119	112009269	+	76.6	0.951	Intergenic	Intergenic	-515088	XR_005499107.1	LOC120099825	XR_005499107	lnc_RNA	5.4077	5.23894	5.99084	6.91336	5.48648	5.49771	2.06599	5.30714e-05	0.0561985	0.326275	0.595863	0.99998
chr1-1772	chr1	240558159	240558309	-	105.5	0.798	promoter-TSS (NM_022953.2)	mRNA-promoter-TSS (NM_022953.2)	-107	NM_022953.2	Slit1	NM_022953	mRNA	5.62172	5.70678	6.44788	6.98613	5.86913	7.08032	1.79953	5.88577e-05	0.0589262	1.63357	0.00701384	0.99998
chr12-667	chr12	36893645	36893795	-	64.1	0.874	promoter-TSS (NM_181638.1)	mRNA-promoter-TSS (NM_181638.1)	333	XM_006249418.2	Tbx3	XM_006249416	mRNA	4.9492	4.97079	6.06767	5.9394	5.21164	6.2224	2.04422	5.83415e-05	0.0589262	1.76199	0.00997313	0.99998
chr14-979	chr14	5339427	5339577	+	29.3	0.185	Intergenic	Intergenic	-24382	NM_012881.2	Spp1	NM_012881	mRNA	4.79262	4.65983	3.59578	3.81024	5.08442	4.52718	-3.88522	5.84081e-05	0.0589262	0.244355	0.699609	0.99998
chr11-14	chr11	49711096	49711246	+	1411.9	0.999	Intergenic	Intergenic	74466	XR_005491306.1	LOC103693556	XR_005491306	lnc_RNA	9.70692	9.77713	8.39742	9.08466	11.7647	9.23967	-1.26165	6.63167e-05	0.0652082	1.65664	0.201327	0.99998
chr3-235	chr3	156638559	156638709	-	516.6	0.93	promoter-TSS (NM_012637.2)	mRNA-promoter-TSS (NM_012637.2)	-177	NM_012637.2	Ptpn1	XM_039104281	mRNA	8.29841	8.12376	8.99339	9.03162	8.28523	9.33192	1.07021	6.9501e-05	0.0659828	0.958066	0.0298869	0.99998
chr7-777	chr7	130844054	130844204	+	138.7	0.861	promoter-TSS (NM_022215.2)	mRNA-promoter-TSS (NM_022215.2)	-9	NM_022215.2	Gpd1	XM_006257376	mRNA	7.01641	7.32776	6.25203	6.17013	6.77611	7.10418	-1.51665	6.86763e-05	0.0659828	-0.329457	0.427914	0.99998
chr17-290	chr17	83767231	83767381	-	201.5	0.655	Intergenic	Intergenic	-7279	XM_039096347.1	RGD1566369	XM_039096347	mRNA	7.77289	7.7109	6.84557	6.8845	7.72117	6.81212	-1.27425	7.27306e-05	0.0678786	-0.54129	0.233219	0.99998
chr16-346	chr16	57802785	57802935	+	147.1	0.94	Intergenic	Intergenic	-198787	XR_005495157.1	LOC120097587	XR_005495157	snoRNA	6.27685	6.52443	7.25162	7.45378	6.30829	7.12899	1.43126	7.4208e-05	0.0681032	0.611702	0.240274	0.99998
chr4-1182	chr4	83723244	83723394	-	52.9	0.972	promoter-TSS (NM_001109235.2)	mRNA-promoter-TSS (NM_001109235.2)	-151	XM_039108138.1	Plekha8	XM_006236506	mRNA	4.82253	4.68587	5.96601	5.6073	4.99993	4.98056	2.09248	8.07083e-05	0.0728544	0.56331	0.437356	0.99998
chr2-3187	chr2	24913288	24913438	-	14.9	0.293	promoter-TSS (NM_001014256.2)	mRNA-promoter-TSS (NM_001014256.2)	746	XM_039101723.1	Dmgdh	XM_039101723	mRNA	3.9331	3.77415	2.93285	2.87504	2.95044	3.0898	-4.09708	9.15831e-05	0.0813376	-2.98402	0.00179532	0.99998
chr3-2575	chr3	106591692	106591842	+	22.9	0.984	TTS (NR_130141.1)	lnc_RNA-TTS (NR_130141.1)	11465	NM_001346423.1	Oip5	NM_001346423	mRNA	4.81241	4.1567	3.33746	3.58867	3.62535	3.98225	-3.44424	9.69873e-05	0.08477	-1.7589	0.0260781	0.99998
chr12-1293	chr12	21046130	21046280	+	22.7	0.659	intron (XM_006249182.4, intron 3 of 3)	mRNA-intron (NM_001191827.1, intron 3 of 3)	8089	NM_001191827.1	Rhbdd2	XM_006249182	mRNA	4.82865	3.99906	3.35893	3.51569	4.0361	3.93534	-3.76192	0.000100324	0.0853308	-1.17768	0.127558	0.99998
chr17-69	chr17	764284	764434	+	686.6	0.998	promoter-TSS (NM_013156.2)	mRNA-promoter-TSS (NM_013156.2)	-11	NM_013156.2	Ctsl	NM_013156	mRNA	8.63862	7.76068	9.14978	9.51545	9.16042	9.8949	1.42402	0.000100728	0.0853308	1.73615	0.000112321	0.241477
chr4-1074	chr4	132207604	132207754	+	64.5	0.994	Intergenic	Intergenic	41380	XR_005504180.1	LOC102555037	XR_005504177	lnc_RNA	5.12766	4.77968	5.73724	6.36163	5.36509	6.10961	2.16376	0.000107465	0.0896584	1.69283	0.0111507	0.99998
chr1-689	chr1	239908725	239908875	-	313.6	0.99	promoter-TSS (NM_001017386.1)	mRNA-promoter-TSS (NM_001017386.1)	-12	NM_001017386.1	Opalin	NM_001017386	mRNA	7.30453	7.4635	8.75437	7.93178	7.8206	8.08097	1.42571	0.000111449	0.0915948	0.816175	0.0317087	0.99998
chr1-2224	chr1	187917750	187917900	-	63.1	0.847	promoter-TSS (XM_039092143.1)	mRNA-promoter-TSS (XM_039092143.1)	-82	XM_039092175.1	Ctbp2	XM_039092169	mRNA	4.84505	4.50572	5.6071	5.91214	4.78298	6.12257	2.23374	0.000115542	0.092206	2.03576	0.0104696	0.99998
chr18-470	chr18	58631895	58632045	+	76.9	0.998	intron (XM_039096676.1, intron 1 of 23)	mRNA-intron (NM_001008300.2, intron 5 of 30)	49344	XM_039096675.1	Nedd4l	XM_039096681	mRNA	6.747	6.08083	5.05732	5.54723	5.6494	5.68629	-1.98081	0.000114928	0.092206	-1.30372	0.010828	0.99998
chrX-61	chrX	1489470	1489620	-	461.4	0.903	promoter-TSS (NM_001008861.2)	mRNA-promoter-TSS (NM_001008861.2)	-25	NM_001008861.2	Usp11	NM_001008861	mRNA	8.06851	8.01759	8.81362	8.81093	7.8321	9.2845	1.03634	0.000121118	0.0952747	0.986884	0.268572	0.99998
chr1-3703	chr1	129688636	129688786	-	34.2	0.516	Intergenic	Intergenic	-33289	XM_039101025.1	LOC103691165	XR_005499249	transcript	5.09253	5.12944	4.1799	4.02228	5.07564	4.12333	-2.55853	0.000127341	0.0987594	-0.815232	0.260714	0.99998
chr13-676	chr13	43361284	43361434	+	49.1	0.969	exon (NM_022799.2, exon 4 of 7)	mRNA-exon (NM_022799.2, exon 4 of 7)	16214	NM_022799.2	Nucks1	XM_006249797	mRNA	3.97325	3.75667	5.97786	5.3491	5.10005	5.0275	5.5015	0.000167241	0.122165	4.41517	3.19519e-05	0.0991519
chr1-1176	chr1	209640901	209641051	+	185.8	0.811	promoter-TSS (NM_001109163.1)	mRNA-promoter-TSS (NM_001109163.1)	1	NM_001109163.1	Fam111a	XM_039087912	mRNA	7.49084	7.57099	7.77634	5.3765	5.51568	5.43411	-0.580048	0.695052	0.999989	-3.28243	1.69475e-13	2.82034e-09
chr1-2605	chr1	209640792	209640942	-	61.2	0.652	promoter-TSS (NM_001109163.1)	mRNA-promoter-TSS (NM_001109163.1)	2	XM_017589579.2	Fam111a	XM_039087912	mRNA	5.88066	5.50972	6.12299	4.45807	4.55501	4.39474	-0.226603	0.870465	0.999989	-2.72679	3.42448e-05	0.0991519
chr12-726	chr12	4438692	4438842	+	58.6	0.601	promoter-TSS (XM_039089918.1)	mRNA-promoter-TSS (XM_039089918.1)	-99	XM_039089919.1	LOC102548389	XM_039089917	mRNA	5.91468	5.94395	5.36194	5.04328	3.92286	4.02091	-1.18822	0.00786369	0.999989	-6.41366	2.78812e-08	0.000173996
chr19-1152	chr19	25538660	25538810	+	19.5	0.75	Intergenic	Intergenic	-101278	XM_017601190.2	Il15	XM_039097507	mRNA	4.21505	4.09231	3.88414	3.87042	3.20179	3.19165	-0.70304	0.294136	0.999989	-7.13619	2.23148e-05	0.0795763
chr19-223	chr19	24487173	24487323	+	221.9	0.919	promoter-TSS (XM_017601372.2)	mRNA-promoter-TSS (XM_017601372.2)	-165	XM_039098036.1	Gipc1	NM_053341	mRNA	7.70231	8.08291	7.48881	7.36824	4.97051	5.214	-0.635452	0.0393457	0.999989	-5.07466	5.29845e-21	2.64525e-16
chr19-436	chr19	23492076	23492226	-	98.1	0.977	Intergenic	Intergenic	-2400	NM_001009541.1	Ier2	NM_001009541	mRNA	6.85712	6.50167	6.17392	6.42767	5.19031	5.49629	-0.59266	0.128822	0.999989	-2.37646	5.49213e-06	0.0229718
chr3-1015	chr3	147026700	147026850	+	101.3	0.927	Intergenic	Intergenic	-4636	NM_001258011.1	Snhg11	NM_001258011	mRNA	6.37566	6.02892	7.0442	3.82824	3.87429	3.97927	0.121433	0.969194	0.999989	-6.61881	8.42321e-09	8.41058e-05
chr3-620	chr3	147421212	147421362	-	203.2	0.998	promoter-TSS (NM_001107796.1)	mRNA-promoter-TSS (NM_001107796.1)	-654	NM_001107796.1	Fam83d	XM_039105094	mRNA	6.59634	6.80276	7.4749	6.8808	7.81461	8.15364	0.775982	0.05618	0.999989	1.86876	2.07514e-06	0.0115113
chr3-74	chr3	8284797	8284947	-	1280.7	0.976	promoter-TSS (NM_013015.2)	mRNA-promoter-TSS (NM_013015.2)	-39	NM_013015.2	Ptgds	NM_013015	mRNA	9.47017	9.21923	9.44158	10.6491	10.7525	10.3227	1.09771	0.131934	0.999989	1.56549	3.68544e-06	0.0183996
chr4-938	chr4	71094023	71094173	-	80.1	0.998	Intergenic	Intergenic	7916	NM_001025150.1	Tas2r144	NM_001025150	mRNA	5.50198	4.94702	5.58377	5.64392	7.15634	6.06962	0.694756	0.248603	0.999989	2.48735	3.55241e-05	0.0991519
chr7-1558	chr7	132360334	132360484	+	47.3	0.827	TTS (XM_039078372.1)	mRNA-TTS (XM_039078372.1)	-7990	XM_017595130.2	Nr4a1	XM_017595130	mRNA	4.45004	4.41289	5.62579	4.15894	5.76463	5.46129	1.65038	0.0679406	0.999989	2.55864	3.57483e-05	0.0991519
chr8-312	chr8	36674178	36674328	-	307.6	0.999	intron (NM_001271279.1, intron 3 of 12)	mRNA-intron (NM_001271278.1, intron 3 of 11)	-11114	XM_039082145.1	Pknox2	XM_039082142	mRNA	7.06632	6.8764	7.34097	8.72917	8.56258	8.35854	1.78234	0.0430017	0.999989	2.10075	1.20237e-08	8.66512e-05
chr9-187	chr9	113866664	113866814	+	329.7	0.921	promoter-TSS (XR_005489527.1)	transcript-promoter-TSS (XR_005489527.1)	59	XR_005489527.1	LOC102550397	XM_039084953	mRNA	6.92304	7.37288	8.77235	7.27838	8.23964	8.55555	1.51419	0.120059	0.999989	1.73462	1.13054e-05	0.0434171
chr9-284	chr9	60930931	60931081	+	232.7	0.981	promoter-TSS (NM_001271185.1)	mRNA-promoter-TSS (NM_001271185.1)	-427	NM_001271185.1	Fzd7	NM_001271185	mRNA	5.85893	6.01601	5.97905	7.89202	8.23031	8.53001	2.10977	0.0830522	0.999989	3.57379	1.55019e-19	3.86967e-15
chr5-1945	chr5	80121587	80121737	-	31.2	0.982	Intergenic	Intergenic	-24205	NM_019178.2	Tlr4	NM_019178	mRNA	3.71733	3.45845	3.97768	4.07068	5.75887	4.23322	1.71175	0.12805	1	4.15763	5.5215e-06	0.0229718

## Sheet: NAc Differntial TSRs
TSR	Chr	Start	End	Strand	Peak Score	Focus Ratio/Region Size	Annotation	Detailed Annotation	Distance to TSS	Nearest PromoterID	Entrez ID	Nearest Unigene	Gene Type	NAc-Naive-r1 (rlog)	NAc-Naive-r2 (rlog)	NAc-Oxy-r1 (rlog)	NAc-Coc-r1 (rlog)	NAc-Coc-r2 (rlog)	naive vs. oxy Log2 Fold Change	naive vs. oxy p-value	naive vs. oxy adj. p-value	naive vs. coc Log2 Fold Change	naive vs. coc p-value	naive vs. coc adj. p-value
chr6-374	chr6	90670721	90670871	+	228.2	0.992	intron (XM_039112722.1, intron 15 of 19)	mRNA-intron (NM_001164400.1, intron 16 of 20)	22753	NM_001106738.1	Jkamp	NM_001106738	mRNA	7.43474	8.09947	5.35577	5.9314	7.76372	-4.97719	1.64203e-13	2.94334e-09	-0.898422	0.490404	0.999991
chr10-37	chr10	87861503	87861653	-	1942.5	0.993	promoter-TSS (NM_017009.2)	mRNA-promoter-TSS (NM_017009.2)	-13	NM_017009.2	Gfap	NM_017009	mRNA	10.0675	10.0372	11.4847	10.8763	10.5466	1.70154	3.79436e-11	3.4007e-07	0.809843	6.72677e-05	0.0615905
chr1-953	chr1	77747443	77747593	-	232	0.987	intron (XM_039089538.1, intron 1 of 14)	mRNA-intron (NM_001388512.1, intron 1 of 14)	2240	NM_001388512.1	Hif3a	XM_039089538	mRNA	7.95321	7.77737	6.03239	7.86691	7.48733	-3.2469	1.41636e-10	8.46275e-07	-0.249317	0.383427	0.999991
chr15-268	chr15	1959632	1959782	+	195.2	0.999	intron (XR_005493800.1, intron 2 of 7)	mRNA-intron (NM_001109441.1, intron 2 of 6)	-103679	unassigned_transcript_1315	Trnat-agu_21	unassigned_transcript_1315	tRNA	6.74496	6.45921	8.4635	6.54708	6.95985	2.69264	2.6009e-10	1.16553e-06	0.282714	0.48705	0.999991
chr9-18	chr9	38711656	38711806	+	1505.2	0.958	promoter-TSS (NM_001271050.1)	mRNA-promoter-TSS (NM_001271050.1)	4	XM_006244827.4	Cnnm4	XM_039083840	mRNA	9.90322	9.75685	11.1929	10.5842	9.70656	1.62404	1.20952e-09	4.33611e-06	0.474628	0.353599	0.999991
chr12-401	chr12	35368402	35368552	-	147.3	0.811	intron (NM_013088.2, intron 1 of 15)	mRNA-intron (NM_001177593.1, intron 1 of 15)	3041	NM_013088.2	Ptpn11	NM_001177593	mRNA	7.87497	7.17665	5.6843	6.52258	6.00633	-3.40505	3.72956e-09	1.00465e-05	-2.0242	4.3811e-07	0.00142393
chr2-701	chr2	241160052	241160202	-	148	0.593	promoter-TSS (XM_006233488.2)	mRNA-promoter-TSS (XM_006233488.2)	551	NM_001037653.1	Fubp1	XM_006233511	mRNA	7.46756	6.87616	5.36071	7.16044	6.91037	-4.41112	3.92333e-09	1.00465e-05	-0.252964	0.476349	0.999991
chr1-2185	chr1	209640901	209641051	+	82.6	0.922	promoter-TSS (NM_001109163.1)	mRNA-promoter-TSS (NM_001109163.1)	1	NM_001109163.1	Fam111a	XM_017589579	mRNA	6.47812	6.58557	4.81086	4.8502	5.23286	-4.21716	6.91937e-09	1.50207e-05	-3.04766	5.08496e-11	4.89593e-07
chr3-275	chr3	168275056	168275206	-	471.4	0.767	promoter-TSS (NM_012660.2)	mRNA-promoter-TSS (NM_012660.2)	-60	NM_012660.2	Eef1a2	NM_012660	mRNA	7.97726	7.7364	9.41112	8.61088	8.79622	2.02957	7.54177e-09	1.50207e-05	1.14707	7.92773e-06	0.0122128
chr1-1790	chr1	77745458	77745608	-	111.4	0.986	intron (XM_039089538.1, intron 1 of 14)	mRNA-intron (NM_001388512.1, intron 1 of 14)	-1510	NM_022528.3	Hif3a	XM_039089538	mRNA	7.14102	6.62734	5.07984	6.60983	6.22075	-5.24376	1.00303e-08	1.57002e-05	-0.795595	0.0413652	0.999991
chr1-540	chr1	51953572	51953722	-	326.1	0.911	promoter-TSS (NM_022236.2)	mRNA-promoter-TSS (NM_022236.2)	-33	NM_022236.2	Pde10a	NM_022236	mRNA	7.55085	7.49686	9.04958	7.98216	7.29285	2.04955	1.05106e-08	1.57002e-05	0.236194	0.496606	0.999991
chr4-202	chr4	178013302	178013452	-	463.2	0.861	promoter-TSS (NM_017253.2)	mRNA-promoter-TSS (NM_017253.2)	6	NM_017253.2	Bcat1	XM_039107212	mRNA	8.0429	7.7312	9.45579	8.30423	8.80066	2.0355	9.2007e-09	1.57002e-05	0.929293	0.0015502	0.411744
chr3-58	chr3	58813089	58813239	-	1604	0.872	promoter-TSS (NM_001361400.1)	mRNA-promoter-TSS (NM_001361400.1)	21	NM_001361400.1	Atp5mc3	NM_001361401	mRNA	9.79081	10.0336	11.2149	10.3506	10.291	1.54475	1.97233e-08	2.71954e-05	0.489264	0.0146165	0.921466
chr2-1158	chr2	954533	954683	+	74.2	0.982	promoter-TSS (XR_005501688.1)	rRNA-promoter-TSS (XR_005501688.1)	25	XR_005501688.1	LOC120101316	XR_005501688	rRNA	5.21714	4.76721	6.9292	5.2884	4.99774	3.63801	2.40314e-08	2.9912e-05	0.417319	0.566427	0.999991
chr4-142	chr4	157580877	157581027	-	577.8	0.354	promoter-TSS (NM_139325.4)	mRNA-promoter-TSS (NM_139325.4)	-16	NM_139325.4	Eno2	NM_139325	mRNA	8.40206	8.25755	9.73768	8.59243	9.1981	1.78794	2.5031e-08	2.9912e-05	0.791888	0.00505514	0.671318
chr7-100	chr7	132381310	132381460	+	783.4	0.937	promoter-TSS (NM_024388.2)	mRNA-promoter-TSS (NM_024388.2)	-6	NM_024388.2	Nr4a1	NM_024388	mRNA	8.5889	8.75197	10.0484	9.81621	9.12541	1.71215	2.86691e-08	3.21184e-05	1.07183	0.000115561	0.0841907
chr15-57	chr15	45533871	45534021	+	629.2	0.67	promoter-TSS (NM_001017376.1)	mRNA-promoter-TSS (NM_001017376.1)	-28	NM_001017376.1	Phyhip	NM_001017376	mRNA	8.55651	8.33782	9.84341	8.99941	9.12221	1.75957	4.09627e-08	4.31916e-05	0.798479	0.000622028	0.244451
chr1-319	chr1	136854929	136855079	+	477	0.951	promoter-TSS (NM_001191626.1)	mRNA-promoter-TSS (NM_001191626.1)	-126	NM_001191626.1	Mex3b	NM_001191626	mRNA	8.17927	8.02474	9.51031	8.8059	8.27944	1.81716	4.93477e-08	4.65556e-05	0.628233	0.0270113	0.999991
chr20-70	chr20	3855871	3856021	-	541.2	0.847	promoter-TSS (NM_212546.4)	mRNA-promoter-TSS (NM_212546.4)	-375	NM_212546.4	Hspa1l	NM_212546	mRNA	8.69091	8.98769	7.35696	9.26456	8.92738	-2.09317	4.71721e-08	4.65556e-05	0.326696	0.180673	0.999991
chr7-83	chr7	8538461	8538611	-	873.5	0.97	promoter-TSS (NM_017245.2)	mRNA-promoter-TSS (NM_017245.2)	-18	NM_017245.2	Eef2	NM_017245	mRNA	8.72753	9.21118	10.436	9.26893	9.35774	1.7648	8.78148e-08	7.8704e-05	0.402464	0.106861	0.999991
chr4-184	chr4	159989403	159989553	-	504.5	0.817	promoter-TSS (NM_022267.2)	mRNA-promoter-TSS (NM_022267.2)	-217	NM_022267.2	Ccnd2	NM_022267	mRNA	8.27803	8.16621	9.57162	8.63346	8.64761	1.73204	1.10446e-07	9.42737e-05	0.559707	0.019146	0.999991
chr10-414	chr10	78943382	78943532	+	372.6	0.996	promoter-TSS (NM_001108290.2)	mRNA-promoter-TSS (NM_001108290.2)	17	XM_017597384.2	Spag9	XM_039086382	mRNA	7.72833	7.71884	9.12377	8.45506	7.97642	1.86621	1.36337e-07	0.000111083	0.718662	0.0142994	0.921466
chr2-40	chr2	135604439	135604589	+	1305.3	0.486	promoter-TSS (XM_039103674.1)	mRNA-promoter-TSS (XM_039103674.1)	2	XM_039103677.1	LOC103691564	XM_039103674	mRNA	10.3984	10.7312	9.34345	10.3066	8.76021	-1.51538	2.11689e-07	0.000164979	-0.986189	0.268907	0.999991
chr11-13	chr11	29456598	29456748	+	1702.6	0.959	promoter-TSS (NM_017050.1)	mRNA-promoter-TSS (NM_017050.1)	0	NM_017050.1	Sod1	NM_017050	mRNA	9.91826	9.81568	11.0081	10.4478	10.895	1.36509	3.52605e-07	0.000263352	1.00063	5.76978e-06	0.0101005
chr1-842	chr1	185497738	185497888	+	260.1	0.953	promoter-TSS (NM_031721.1)	mRNA-promoter-TSS (NM_031721.1)	-2	NM_031721.1	Htra1	NM_031721	mRNA	8.17028	8.01579	6.68431	7.9635	7.55847	-2.2043	4.02109e-07	0.000288312	-0.445033	0.11467	0.999991
chr11-42	chr11	80364093	80364243	-	775.6	0.6	promoter-TSS (NM_053837.2)	mRNA-promoter-TSS (NM_053837.2)	50	XM_039087902.1	Ap2m1	XM_039087902	mRNA	9.01911	8.76766	10.1506	9.32384	9.21315	1.54958	4.42403e-07	0.000305003	0.474971	0.0343933	0.999991
chr3-639	chr3	165414991	165415141	+	183.2	0.905	intron (XM_039105553.1, intron 8 of 12)	mRNA-intron (NM_214459.3, intron 7 of 11)	-23645	XM_039106752.1	LOC120101827	XM_039106752	mRNA	7.79256	7.5881	6.27306	7.09037	7.04355	-2.40749	5.71328e-07	0.000379298	-0.944204	0.00114179	0.343545
chr10-40	chr10	15338044	15338194	-	1911.9	0.992	promoter-TSS (NM_013096.2)	mRNA-promoter-TSS (NM_013096.2)	2	NM_013096.2	Hba-a1	NM_013096	mRNA	10.2437	9.81408	11.2808	10.039	11.2156	1.4677	7.47121e-07	0.000478291	0.863335	0.219141	0.999991
chr11-84	chr11	66198094	66198244	+	498	0.955	promoter-TSS (XM_039088642.1)	mRNA-promoter-TSS (XM_039088642.1)	13	XM_039088664.1	Kalrn	XM_039088643	mRNA	8.44664	8.24523	9.60835	8.56823	8.38743	1.60678	8.4713e-07	0.000523614	0.17867	0.474384	0.999991
chr10-3	chr10	88062705	88062855	+	11743.1	0.995	promoter-TSS (NM_001025136.1)	mRNA-promoter-TSS (NM_001025136.1)	-28	NM_001025136.1	Hexim1	NM_001025136	mRNA	13.0158	12.7881	13.9475	13.6322	12.9133	1.20106	8.82486e-07	0.000527285	0.487678	0.0446664	0.999991
chr1-888	chr1	77749676	77749826	-	248.1	0.695	promoter-TSS (NM_001388512.1)	mRNA-promoter-TSS (NM_001388512.1)	7	NM_001388512.1	Hif3a	XM_039089538	mRNA	8.05513	7.71839	6.45388	8.19033	7.49141	-2.35642	9.88877e-07	0.000571794	-0.00848056	0.979657	0.999991
chr11-321	chr11	1551802	1551952	-	130.7	0.997	promoter-TSS (XR_005491518.1)	snRNA-promoter-TSS (XR_005491518.1)	68	XR_005491519.1	LOC120095723	XR_005491519	snRNA	7.36346	7.12426	5.83784	5.92424	6.58294	-2.60009	1.11555e-06	0.000624881	-1.56517	0.000107338	0.0841907
chr19-226	chr19	9386834	9386984	-	212.5	0.777	promoter-TSS (NM_001271091.1)	mRNA-promoter-TSS (NM_001271091.1)	5	NM_001271092.1	Ndrg4	NM_031967	mRNA	6.87943	6.75572	8.2349	7.04654	7.72589	2.09875	1.44421e-06	0.000770248	0.982261	0.0102315	0.839682
chr5-929	chr5	47261347	47261497	+	101.7	0.819	promoter-TSS (XM_039110551.1)	mRNA-promoter-TSS (XM_039110551.1)	-363	XM_039110551.1	Ankrd6	XM_017593571	mRNA	6.33653	6.71921	5.15365	6.45981	6.3338	-3.96074	1.461e-06	0.000770248	-0.267628	0.477451	0.999991
chr3-1047	chr3	116426920	116427070	-	89.7	0.549	promoter-TSS (NM_031148.2)	mRNA-promoter-TSS (NM_031148.2)	-100	XM_006234992.4	Slc20a1	NM_031148	mRNA	6.02089	5.97024	4.46545	5.3146	4.49797	-5.69328	1.62138e-06	0.000830379	-2.2265	0.0928491	0.999991
chr2-1046	chr2	135694943	135695093	+	83.3	0.958	intron (XM_039102008.1, intron 1 of 3)	mRNA-intron (NM_001106430.1, intron 1 of 4)	1402	XM_039102008.1	Mgst2	XM_039102006	mRNA	6.43999	6.2395	5.00692	6.24232	6.02113	-4.28514	1.88026e-06	0.000936215	-0.384548	0.321425	0.999991
chr1-115	chr1	203134231	203134381	-	1004.9	0.991	exon (XR_005494731.1, exon 1 of 3)	lnc_RNA-exon (XR_005494731.1, exon 1 of 3)	5077	XR_005494740.1	LOC120097382	XR_005494731	lnc_RNA	8.87707	9.37878	10.4367	9.45551	9.93742	1.56458	2.35498e-06	0.00114089	0.705452	0.00905759	0.810476
chr1-1522	chr1	77749921	77750071	+	135.6	0.809	promoter-TSS (NM_001388512.1)	mRNA-promoter-TSS (NM_001388512.1)	-238	NM_001388512.1	Hif3a	XM_039089538	mRNA	7.10029	6.85574	5.60551	6.96842	6.96178	-3.02213	2.47623e-06	0.00116806	-0.0272659	0.932188	0.999991
chr8-53	chr8	58996799	58996949	+	912.3	0.609	promoter-TSS (NM_019380.2)	mRNA-promoter-TSS (NM_019380.2)	-2	XR_005487908.1	Nptn	XM_039082020	mRNA	9.5998	8.99421	10.6489	9.17504	9.11961	1.59327	2.57429e-06	0.00118318	-0.228243	0.380428	0.999991
chr1-9	chr1	136800120	136800270	+	3987.3	1	Intergenic	Intergenic	-54935	NM_001191626.1	Mex3b	NM_001191626	mRNA	13.6055	4.09827	4.32866	4.66964	5.46783	-27.909	2.70489e-06	0.00121213	-9.11553	0.0292007	0.999991
chr18-327	chr18	25045900	25046050	-	133.1	0.814	promoter-TSS (XM_006254595.3)	mRNA-promoter-TSS (XM_006254595.3)	89	XM_006254595.3	Nrep	XM_039096942	mRNA	6.28959	6.30631	7.70125	6.47265	6.42086	2.24669	2.97259e-06	0.0012996	0.282632	0.487705	0.999991
chr14-22	chr14	41495511	41495661	-	1192.8	0.977	promoter-TSS (NM_017237.3)	mRNA-promoter-TSS (NM_017237.3)	4	NM_017237.3	Uchl1	NM_017237	mRNA	9.54097	8.98688	10.5736	9.8734	10.4055	1.55717	3.26656e-06	0.00139412	1.08234	6.80435e-05	0.0615905
chr18-42	chr18	28162279	28162429	+	761.9	0.978	promoter-TSS (NM_001204053.1)	mRNA-promoter-TSS (NM_001204053.1)	-30	NM_001204053.1	Ankhd1	XR_005495988	transcript	8.88125	8.89255	10.002	9.61648	9.06402	1.38397	3.56583e-06	0.00145267	0.614394	0.0163597	0.951752
chr5-780	chr5	161022362	161022512	-	132.9	0.96	intron (XM_008764201.3, intron 10 of 21)	mRNA-intron (NM_053885.2, intron 11 of 22)	-25046	XM_039109153.1	Rere	XM_006239441	mRNA	7.1359	7.10087	5.80088	6.51121	6.50367	-2.57812	3.52654e-06	0.00145267	-1.01892	0.00164947	0.424777
chr12-41	chr12	15185666	15185816	+	885.1	0.86	promoter-TSS (NM_001025033.1)	mRNA-promoter-TSS (NM_001025033.1)	13	NM_001025033.1	LOC498154	NM_001025033	mRNA	9.06253	9.19179	10.2012	9.84528	9.24395	1.31561	7.31407e-06	0.00278946	0.565685	0.0288177	0.999991
chr20-300	chr20	6969453	6969603	+	147.5	0.999	exon (XM_039099253.1, exon 2 of 12)	mRNA-exon (XM_039099253.1, exon 2 of 12)	5534	XM_039099253.1	Bnip5	XM_039099253	mRNA	6.72044	6.29881	7.94474	6.45494	6.36056	2.1572	7.22857e-06	0.00278946	-0.2049	0.627395	0.999991
chr7-326	chr7	130844054	130844204	+	341.4	0.901	promoter-TSS (NM_022215.2)	mRNA-promoter-TSS (NM_022215.2)	-9	NM_022215.2	Gpd1	XM_006257376	mRNA	9.09671	8.44844	7.45799	7.8609	7.29548	-1.86754	7.13855e-06	0.00278946	-1.62794	6.39765e-07	0.00175995
chr3-34	chr3	168424852	168425002	-	2463.1	0.968	promoter-TSS (NM_024346.2)	mRNA-promoter-TSS (NM_024346.2)	19	NM_024346.2	Stmn3	NM_024346	mRNA	10.6077	10.0881	11.5286	10.7579	11.5913	1.3662	7.84721e-06	0.00293044	1.0408	0.0659619	0.999991
chr14-80	chr14	42718457	42718607	-	562.7	0.639	promoter-TSS (NM_001106006.1)	mRNA-promoter-TSS (NM_001106006.1)	16	XM_039091717.1	Ube2k	XM_039091717	mRNA	8.38923	8.52531	9.59266	9.0576	8.70103	1.44059	8.15981e-06	0.00298499	0.56505	0.0239897	0.999991
chr8-303	chr8	54355220	54355370	-	325.4	0.817	promoter-TSS (NM_001191579.1)	mRNA-promoter-TSS (NM_001191579.1)	52	XM_006243083.4	Elmod1	XM_006243083	mRNA	7.88145	7.4079	8.98299	8.05035	7.77216	1.77216	9.0932e-06	0.00325991	0.365564	0.243933	0.999991
chr3-12	chr3	136340674	136340824	-	13129.1	0.998	promoter-TSS (NM_012837.1)	mRNA-promoter-TSS (NM_012837.1)	47	NM_012837.1	Cst3	NM_012837	mRNA	12.9675	12.7713	13.7897	13.3114	13.9927	1.06013	1.14494e-05	0.00402414	0.965879	4.67846e-05	0.0486977
chr10-57	chr10	71803768	71803918	-	1459.3	0.875	promoter-TSS (NM_001108286.1)	mRNA-promoter-TSS (NM_001108286.1)	-3	XM_006247097.1	Ypel2	XM_006247097	mRNA	10.0207	9.77105	10.9212	10.5218	10.0598	1.22007	1.26261e-05	0.00435236	0.501152	0.0300322	0.999991
chr17-138	chr17	30796767	30796917	+	393.9	0.981	promoter-TSS (NM_001109119.1)	mRNA-promoter-TSS (NM_001109119.1)	0	NM_001109119.1	Tubb2a	NM_001109119	mRNA	7.66011	7.8978	9.00052	8.05923	8.69582	1.62103	1.31723e-05	0.00445498	0.875152	0.0054745	0.689158
chr4-9	chr4	157364790	157364940	-	2751.8	0.81	promoter-TSS (NM_134376.1)	mRNA-promoter-TSS (NM_134376.1)	-96	NM_134376.1	Clstn3	NM_134376	mRNA	10.8798	10.5199	11.7344	11.2525	11.4149	1.20315	1.46855e-05	0.00487477	0.747163	0.000246078	0.137351
chr13-51	chr13	77889206	77889356	-	784.7	0.849	promoter-TSS (NM_001007728.1)	mRNA-promoter-TSS (NM_001007728.1)	24	XM_006250180.4	Mpzl1	XM_006250180	mRNA	8.84796	8.94923	9.95437	9.58181	9.36641	1.30968	1.50285e-05	0.00489791	0.732689	0.000808547	0.272431
chr6-86	chr6	127707162	127707312	+	779.8	0.874	promoter-TSS (NM_173290.1)	mRNA-promoter-TSS (NM_173290.1)	-401	NM_173290.1	Yy1	XM_006240537	mRNA	8.87244	8.51894	9.84112	9.28953	8.80294	1.4216	1.60888e-05	0.00514985	0.469712	0.0814799	0.999991
chr2-152	chr2	196663296	196663446	-	601.9	0.996	promoter-TSS (NM_001163568.2)	mRNA-promoter-TSS (NM_001163568.2)	0	NM_001163568.2	Fam102b	NM_001163568	mRNA	8.85151	8.7487	9.8448	8.78651	8.47417	1.3025	1.75888e-05	0.0055312	-0.208219	0.390897	0.999991
chr6-1059	chr6	79482920	79483070	+	51.4	0.996	intron (XM_039112240.1, intron 1 of 4)	mRNA-intron (NM_001108024.1, intron 1 of 5)	15034	NM_001108024.1	Lrfn5	NM_001108024	mRNA	5.19584	5.89038	4.28927	4.30727	4.38533	-4.15836	1.80356e-05	0.00557393	-3.59892	1.24418e-08	7.98617e-05
chr10-314	chr10	78903439	78903589	-	394.6	0.61	promoter-TSS (NM_031833.2)	mRNA-promoter-TSS (NM_031833.2)	86	NM_031833.2	Nme2	NM_031833	mRNA	8.04398	7.55637	9.09084	7.79153	8.56026	1.68359	1.89275e-05	0.00569818	0.57904	0.101483	0.999991
chr19-3	chr19	10236806	10236956	-	2235.2	0.986	promoter-TSS (NM_134455.2)	mRNA-promoter-TSS (NM_134455.2)	-49	NM_134455.2	Cx3cl1	XM_008772329	mRNA	10.5403	10.4698	11.4293	10.7562	11.1249	1.09067	1.90734e-05	0.00569818	0.540317	0.00850971	0.805046
chr20-153	chr20	12790876	12791026	+	273.8	0.765	promoter-TSS (NM_031051.2)	mRNA-promoter-TSS (NM_031051.2)	32	NM_031051.2	Mif	NM_031051	mRNA	7.52395	6.95976	8.6348	7.67558	7.94878	1.909	1.9503e-05	0.00573101	0.816436	0.0165788	0.956024
chr10-41	chr10	53793865	53794015	+	1856.5	0.594	promoter-TSS (NM_012663.2)	mRNA-promoter-TSS (NM_012663.2)	-7	NM_012663.2	Vamp2	NM_012663	mRNA	10.3415	9.79326	11.223	10.2371	11.0685	1.33993	2.14805e-05	0.00621028	0.755044	0.192373	0.999991
chr12-33	chr12	19158928	19159078	+	946.2	0.774	promoter-TSS (NM_031037.2)	mRNA-promoter-TSS (NM_031037.2)	1	NM_031037.2	Gnb2	XM_039089799	mRNA	9.36144	9.05021	10.2739	9.66269	9.7611	1.29798	2.24905e-05	0.00629909	0.626189	0.00427846	0.636203
chr1-383	chr1	240298526	240298676	+	492.5	0.949	promoter-TSS (XM_006231418.4)	mRNA-promoter-TSS (XM_006231418.4)	36	XM_039085693.1	Lcor	XM_006231418	mRNA	8.12884	8.32183	9.34892	8.91387	8.53637	1.44623	2.24662e-05	0.00629909	0.676189	0.0100655	0.839682
chr14-481	chr14	5339395	5339545	-	107.2	0.596	Intergenic	Intergenic	-24350	NM_012881.2	Spp1	NM_012881	mRNA	6.32241	6.57271	4.91477	6.67033	6.59587	-9.03357	2.41657e-05	0.00666415	0.296351	0.399478	0.999991
chr2-187	chr2	182540135	182540285	-	541.2	0.536	promoter-TSS (NM_031083.2)	mRNA-promoter-TSS (NM_031083.2)	57	XR_005501103.1	LOC108350066	XR_005501103	lnc_RNA	8.5347	8.3387	9.52211	8.95937	8.7176	1.38231	2.61954e-05	0.00711442	0.533943	0.0280358	0.999991
chr16-332	chr16	78997381	78997531	-	151.3	0.927	intron (XM_039094188.1, intron 27 of 34)	mRNA-intron (NM_138893.2, intron 26 of 33)	-138217	XR_005495128.1	LOC120097572	XR_005495129	lnc_RNA	7.42877	7.21522	6.10929	7.02797	6.83139	-2.21381	2.7609e-05	0.00738645	-0.618714	0.0498546	0.999991
chr13-194	chr13	92910310	92910460	+	263.4	0.698	promoter-TSS (NM_001105981.1)	mRNA-promoter-TSS (NM_001105981.1)	70	NM_001105981.1	Cnih4	NM_001105981	mRNA	7.44036	7.50324	8.62735	7.77637	7.24472	1.59571	2.86042e-05	0.00747414	0.0999737	0.763926	0.999991
chr3-1128	chr3	76868485	76868635	+	87.5	0.501	promoter-TSS (NM_001107745.1)	mRNA-promoter-TSS (NM_001107745.1)	20	NM_001107745.1	C1qtnf4	NM_001107745	mRNA	5.61897	5.41914	6.86346	5.90999	6.30626	2.64947	2.87708e-05	0.00747414	1.39062	0.00675297	0.724449
chrX-68	chrX	71271304	71271454	+	430.9	0.64	promoter-TSS (NM_053291.3)	mRNA-promoter-TSS (NM_053291.3)	-75	NM_053291.3	Pgk1	NM_053291	mRNA	8.09786	7.84593	9.12024	8.12612	8.88526	1.5064	2.92964e-05	0.00750197	0.801069	0.0131186	0.91055
chr18-350	chr18	53760899	53761049	-	120.7	0.839	promoter-TSS (NM_001012353.1)	mRNA-promoter-TSS (NM_001012353.1)	-144	NM_001012353.1	MGC108823	NM_001012353	mRNA	7.03446	6.83344	5.72898	6.15546	6.87411	-2.46055	3.38513e-05	0.00831213	-0.607239	0.14268	0.999991
chr2-156	chr2	93251995	93252145	-	579.1	0.718	promoter-TSS (NM_053440.2)	mRNA-promoter-TSS (NM_053440.2)	-59	NM_053440.2	Stmn2	NM_053440	mRNA	8.46779	8.23292	9.44878	8.59201	9.42563	1.40123	3.37644e-05	0.00831213	0.948474	0.00247452	0.496361
chr8-244	chr8	19189329	19189479	+	372.2	0.976	promoter-TSS (NM_001106701.2)	mRNA-promoter-TSS (NM_001106701.2)	-4	NM_001106701.2	Pin1	NM_001106701	mRNA	8.09373	7.79239	9.09406	8.32325	7.97666	1.51165	3.34194e-05	0.00831213	0.295482	0.302876	0.999991
chr11-114	chr11	43417082	43417232	-	393.5	0.873	promoter-TSS (NM_212519.2)	mRNA-promoter-TSS (NM_212519.2)	1	NM_212519.2	Tomm70	XM_008768645	mRNA	8.059	7.66737	9.06455	8.33093	8.49586	1.57895	3.48104e-05	0.00843211	0.74712	0.00699397	0.737969
chr15-71	chr15	16906908	16907058	-	566	0.372	promoter-TSS (NM_001007680.1)	mRNA-promoter-TSS (NM_001007680.1)	-13	NM_001007680.1	Abhd6	XM_006251768	mRNA	8.41426	8.36904	9.44614	9.02199	9.0581	1.35159	3.59271e-05	0.00858658	0.850093	0.000150627	0.0951
chr1-210	chr1	202002848	202002998	+	724.2	0.639	promoter-TSS (NM_019167.2)	mRNA-promoter-TSS (NM_019167.2)	-47	NM_019167.2	Sptbn2	XM_008760094	mRNA	9.02956	8.83308	9.94835	9.17911	9.23052	1.25944	3.89241e-05	0.00902678	0.348418	0.112307	0.999991
chr1-355	chr1	77743639	77743789	+	515.1	0.959	exon (NM_001388512.1, exon 2 of 15)	mRNA-exon (NM_001388512.1, exon 2 of 15)	309	NM_022528.3	Hif3a	XM_039089538	mRNA	9.22099	8.85843	7.94749	8.9037	8.76629	-1.48806	3.96956e-05	0.00902678	-0.274595	0.248306	0.999991
chr16-55	chr16	18891028	18891178	-	680.1	0.881	promoter-TSS (NM_001107304.2)	mRNA-promoter-TSS (NM_001107304.2)	-12	NM_001107304.2	Ell	XR_005494609	transcript	8.80504	8.80977	9.80963	9.34916	8.97445	1.25282	3.94044e-05	0.00902678	0.472394	0.0472165	0.999991
chr2-524	chr2	140339002	140339152	-	218.4	0.647	promoter-TSS (XM_039103974.1)	mRNA-promoter-TSS (XM_039103974.1)	-438	XR_005501478.1	Nbea	XM_039103982	mRNA	7.08774	7.15608	8.29916	7.40316	7.2777	1.70031	4.02869e-05	0.00902678	0.342418	0.279091	0.999991
chr3-337	chr3	144324369	144324519	-	404.3	0.699	promoter-TSS (NM_001384170.1)	mRNA-promoter-TSS (NM_001384170.1)	5	NM_001384170.1	Mmp24os	NM_001384170	mRNA	8.02598	7.87851	9.05542	8.24395	8.61306	1.46035	4.02498e-05	0.00902678	0.673747	0.0133815	0.91055
chr10-219	chr10	104529727	104529877	+	608.6	0.784	promoter-TSS (NM_199118.1)	mRNA-promoter-TSS (NM_199118.1)	-22	NM_199118.1	Gaa	XM_006247905	mRNA	8.6652	8.0774	9.616	9.04314	9.27496	1.54307	4.64295e-05	0.00990773	0.992782	0.000330513	0.167487
chr2-698	chr2	183837221	183837371	+	154	0.984	promoter-TSS (NM_001107698.1)	mRNA-promoter-TSS (NM_001107698.1)	-15	NM_001107698.1	Hist2h3c2	NM_001107698	mRNA	7.62804	7.17862	6.1871	6.71541	6.98669	-2.17394	4.48342e-05	0.00990773	-0.881609	0.010107	0.839682
chr3-2	chr3	117477870	117478020	+	60788.6	0.974	promoter-TSS (XR_005503063.1)	snoRNA-promoter-TSS (XR_005503063.1)	0	XR_005503116.1	LOC120102094	XR_005503116	snoRNA	15.8472	15.7487	15.0052	16.4341	14.7055	-0.936097	4.60881e-05	0.00990773	0.051376	0.943289	0.999991
chr5-251	chr5	49791029	49791179	-	459.7	0.581	promoter-TSS (XM_039109830.1)	mRNA-promoter-TSS (XM_039109830.1)	74	XM_039109830.1	RGD1359108	XM_039109829	mRNA	8.12963	8.28185	9.27846	8.76667	8.35313	1.38754	4.54737e-05	0.00990773	0.492954	0.0667066	0.999991
chr4-209	chr4	115170996	115171146	-	450.2	0.972	promoter-TSS (NM_001108634.1)	mRNA-promoter-TSS (NM_001108634.1)	26	NM_001108634.1	Pole4	NM_001108634	mRNA	8.37282	8.17915	9.32454	8.58654	8.26693	1.3739	4.70184e-05	0.00991536	0.218822	0.405565	0.999991
chr11-36	chr11	41889258	41889408	-	862.5	0.893	promoter-TSS (XM_006248204.4)	mRNA-promoter-TSS (XM_006248204.4)	22	XM_006248206.4	Cldnd1	XM_006248204	mRNA	9.12231	9.04702	10.0578	9.88425	9.3378	1.19955	4.80355e-05	0.00994518	0.698046	0.00507838	0.671318
chr1-767	chr1	167331723	167331873	+	277.4	0.848	promoter-TSS (NM_024362.2)	mRNA-promoter-TSS (NM_024362.2)	-22	NM_024362.2	Arntl	XM_017589065	mRNA	7.44597	7.16752	8.5067	8.14834	7.66581	1.68399	4.82695e-05	0.00994518	0.909562	0.00494038	0.664862
chr20-378	chr20	43394562	43394712	-	116.1	0.688	promoter-TSS (XM_039099168.1)	mRNA-promoter-TSS (XM_039099168.1)	-240	XM_039099168.1	RGD1561777	XM_039099169	mRNA	6.56678	7.10251	5.62515	6.39491	6.36059	-2.61505	4.91789e-05	0.0100174	-0.854398	0.0257292	0.999991
chr10-616	chr10	888003	888153	+	261.6	0.413	promoter-TSS (NM_133421.2)	mRNA-promoter-TSS (NM_133421.2)	-4	NM_133421.2	Marf1	XM_006245856	mRNA	7.11129	6.83565	8.17899	6.96635	7.13889	1.76041	5.51443e-05	0.010981	0.130063	0.709154	0.999991
chr7-33	chr7	110643054	110643204	-	1481	0.731	Intergenic	Intergenic	2144	unassigned_transcript_874	Trnav-aac_23	unassigned_transcript_874	tRNA	10.4505	10.6787	9.65532	9.92963	10.4375	-1.12726	5.57474e-05	0.010981	-0.433817	0.0624121	0.999991
chr7-42	chr7	111109109	111109259	-	1237.1	0.972	exon (NM_001372136.1, exon 1 of 13)	mRNA-exon (NM_001372136.1, exon 1 of 13)	169	NM_001372136.1	Ddx17	NM_001372136	mRNA	9.55868	9.54726	10.4792	10.5034	9.92395	1.121	5.567e-05	0.010981	0.851355	0.00042487	0.197145
chr1-37	chr1	111123537	111123687	-	1999.2	0.842	promoter-TSS (NM_001270712.1)	mRNA-promoter-TSS (NM_001270712.1)	22	NM_130738.2	Snurf	NM_130738	mRNA	10.3653	10.4268	11.2708	10.8237	10.7196	1.03407	5.90525e-05	0.0113819	0.453135	0.0134263	0.91055
chr1-52	chr1	67097825	67097975	+	1491.4	0.922	promoter-TSS (NM_001304816.1)	mRNA-promoter-TSS (NM_001304816.1)	-12	NM_001304816.1	Peg3	XM_017588641	mRNA	9.98322	9.97245	10.8708	10.391	10.2823	1.06692	5.90468e-05	0.0113819	0.438979	0.0199941	0.999991
chr7-494	chr7	111594852	111595002	-	231.5	0.999	promoter-TSS (XR_005487641.1)	snRNA-promoter-TSS (XR_005487641.1)	0	XR_005487641.1	LOC120093929	XR_005487641	snRNA	8.37682	7.89704	6.97564	6.57784	7.39487	-1.74895	6.24005e-05	0.0118992	-1.6022	0.0217325	0.999991
chr4-110	chr4	9619806	9619956	+	699.2	0.377	promoter-TSS (XM_008762670.3)	mRNA-promoter-TSS (XM_008762670.3)	-757	XR_005504104.1	Kmt2c	XM_039108963	mRNA	8.6564	8.89415	9.79481	9.46949	9.04154	1.26624	7.00315e-05	0.0132138	0.62755	0.0125292	0.891934
chr8-140	chr8	110459249	110459399	-	575.6	0.977	promoter-TSS (XM_006243994.4)	mRNA-promoter-TSS (XM_006243994.4)	118	XM_236647.9	Klhl18	XM_039082646	mRNA	8.55857	8.43813	9.5062	9.27372	8.73482	1.28243	7.55821e-05	0.0141126	0.696237	0.00905509	0.810476
chrX-19	chrX	97937092	97937242	+	1199.2	0.734	promoter-TSS (NM_001014273.1)	mRNA-promoter-TSS (NM_001014273.1)	-41	NM_001014273.1	Armcx3	NM_001014273	mRNA	9.72868	9.42439	10.5487	10.07	10.112	1.16567	7.81648e-05	0.0144444	0.625818	0.00275812	0.53538
chr17-67	chr17	6263792	6263942	+	712.7	0.718	promoter-TSS (XM_006253553.4)	mRNA-promoter-TSS (XM_006253553.4)	-139	XM_039096368.1	Rmi1	XM_039096370	mRNA	8.96381	8.79014	9.85439	9.33284	9.19793	1.21581	8.0675e-05	0.0147561	0.497212	0.0238594	0.999991
chr1-1040	chr1	207252913	207253063	+	208.3	0.974	promoter-TSS (NM_001039031.1)	mRNA-promoter-TSS (NM_001039031.1)	47	XM_006231057.3	Tkfc	NM_001039031	mRNA	6.76972	6.96241	8.05039	7.1561	7.19934	1.76794	8.25047e-05	0.014789	0.497809	0.141343	0.999991
chr17-135	chr17	9034093	9034243	-	399.9	0.867	promoter-TSS (NM_001009703.1)	mRNA-promoter-TSS (NM_001009703.1)	-8	NM_001009703.1	Tmed9	NM_001009703	mRNA	7.9815	8.10885	9.09338	8.40973	8.23392	1.37671	8.16864e-05	0.014789	0.379071	0.140073	0.999991
chr3-113	chr3	106578230	106578380	+	968.8	0.909	promoter-TSS (NR_130141.1)	lnc_RNA-promoter-TSS (NR_130141.1)	-4	NR_130141.1	Oip5-as1	NR_130141	lnc_RNA	9.34539	9.26456	10.2264	9.85252	9.67623	1.12605	9.0055e-05	0.0159825	0.576797	0.00504533	0.671318
chr2-398	chr2	193286530	193286680	+	288.7	0.982	promoter-TSS (NM_001005765.1)	mRNA-promoter-TSS (NM_001005765.1)	-92	XM_039102075.1	Rap1a	NM_001005765	mRNA	6.96827	7.33407	8.3916	8.36285	7.9294	1.74945	9.39684e-05	0.0165136	1.44959	7.21602e-06	0.0115796
chrX-135	chrX	97503438	97503588	+	264.5	0.985	exon (NM_001001799.1, exon 1 of 2)	mRNA-exon (NM_001001799.1, exon 1 of 2)	163	NM_001001799.1	Tmem35a	NM_001001799	mRNA	7.122	7.4032	8.43188	7.61305	7.97428	1.64637	9.79856e-05	0.0170524	0.795202	0.0131166	0.91055
chr5-370	chr5	141310335	141310485	-	312.6	0.975	promoter-TSS (NM_001014261.3)	mRNA-promoter-TSS (NM_001014261.3)	5	XM_039110469.1	Azin2	NM_001014261	mRNA	7.67054	7.74002	8.76746	8.1211	7.71407	1.44123	9.94129e-05	0.0171344	0.325723	0.270796	0.999991
chr1-235	chr1	20037646	20037796	-	677.9	0.824	promoter-TSS (XM_017589842.2)	mRNA-promoter-TSS (XM_017589842.2)	32	XM_039099058.1	Epb41l2	XM_039099131	mRNA	9.24912	8.65123	10.098	9.07974	8.34339	1.37132	0.000101556	0.0173371	-0.280882	0.631386	0.999991
chr12-85	chr12	32560003	32560153	+	559.2	0.985	promoter-TSS (NM_001105928.1)	mRNA-promoter-TSS (NM_001105928.1)	18	XM_039089236.1	Vps37b	XM_039089236	mRNA	8.17514	8.68979	9.58185	8.82988	8.75569	1.42321	0.000103745	0.0175436	0.432872	0.109527	0.999991
chr3-123	chr3	8070762	8070912	-	895.5	0.577	promoter-TSS (NM_001107818.1)	mRNA-promoter-TSS (NM_001107818.1)	2	XM_039105197.1	Ndor1	XR_005501908	transcript	9.16785	8.99709	10.0309	10.0169	9.48094	1.16727	0.00010617	0.0177204	0.867586	0.000478374	0.207007
chrX-63	chrX	149492362	149492512	+	453.5	0.989	promoter-TSS (XM_006253301.3)	mRNA-promoter-TSS (XM_006253301.3)	53	XM_006253301.3	Vma21	XM_006253301	mRNA	8.30261	8.08996	9.2293	8.52274	8.65102	1.34092	0.000106767	0.0177204	0.526507	0.0338363	0.999991
chr10-231	chr10	36911376	36911526	+	588.6	0.982	promoter-TSS (NM_001107000.2)	mRNA-promoter-TSS (NM_001107000.2)	31	NM_001107000.2	Fstl4	XM_039085929	mRNA	8.92462	8.46022	9.77838	9.03212	8.42422	1.33608	0.000108359	0.0178196	0.0700737	0.814589	0.999991
chr9-513	chr9	42244967	42245117	-	117.9	0.506	intron (XM_039083257.1, intron 2 of 29)	mRNA-intron (NM_001106904.1, intron 1 of 28)	43422	NM_001106904.1	Map4k4	XM_008767001	mRNA	7.00296	6.95123	5.8697	6.37727	6.51378	-2.17286	0.000110633	0.0180281	-0.906556	0.00741659	0.752354
chr10-256	chr10	52292359	52292509	+	535	0.768	promoter-TSS (XM_006246830.4)	mRNA-promoter-TSS (XM_006246830.4)	22	XM_039086992.1	Gas7	XM_039086993	mRNA	8.43559	8.4082	9.39967	9.11453	8.64237	1.25307	0.000124029	0.0198424	0.629179	0.0158135	0.945692
chr19-130	chr19	51415520	51415670	+	369.3	0.678	exon (XM_003751893.5, exon 1 of 18)	mRNA-exon (XM_003751893.5, exon 1 of 18)	254	XM_214707.10	Tcf25	XM_006255791	mRNA	7.54917	8.00802	8.94984	8.00175	8.41968	1.53376	0.000124272	0.0198424	0.593115	0.0584336	0.999991
chr2-998	chr2	174776078	174776228	-	91.7	0.553	intron (XM_039103764.1, intron 3 of 15)	mRNA-intron (XM_008761243.3, intron 3 of 15)	5597	XM_039103764.1	Dcst1	XM_017591306	mRNA	6.83447	6.51416	5.5539	6.23148	5.69526	-2.38998	0.000125087	0.0198424	-1.27409	0.00337379	0.58794
chr11-118	chr11	2565280	2565430	-	377.7	0.492	promoter-TSS (NM_001105900.1)	mRNA-promoter-TSS (NM_001105900.1)	197	XM_237855.10	Zfp654	XM_039088760	mRNA	8.36219	7.98488	9.23624	7.83377	7.67454	1.35992	0.000143197	0.02232	-0.594029	0.0372784	0.999991
chr15-245	chr15	7524064	7524214	+	208.7	0.53	promoter-TSS (NM_147210.2)	mRNA-promoter-TSS (NM_147210.2)	-118	NM_147210.2	Nr1d2	NM_147210	mRNA	7.2825	6.95253	8.26713	7.4815	7.00888	1.64783	0.000142782	0.02232	0.224629	0.534866	0.999991
chr20-216	chr20	31811663	31811813	+	203.8	0.919	promoter-TSS (NM_001164157.1)	mRNA-promoter-TSS (NM_001164157.1)	-79	NM_001164157.1	Nus1	NM_001164157	mRNA	6.92133	7.15042	8.17078	7.14084	7.32155	1.65238	0.000146626	0.0226576	0.305093	0.363686	0.999991
chr15-25	chr15	11751656	11751806	-	909	0.747	exon (NM_023974.1, exon 1 of 5)	mRNA-exon (NM_023974.1, exon 1 of 5)	150	NM_023974.1	Synpr	NM_023974	mRNA	9.53554	9.06625	10.3278	9.57153	9.36294	1.22718	0.000153018	0.0232279	0.190533	0.433707	0.999991
chr4-223	chr4	115560014	115560164	-	422	0.906	promoter-TSS (NM_001079899.1)	mRNA-promoter-TSS (NM_001079899.1)	-11	NM_001106599.2	Htra2	XR_005503190	transcript	8.12066	8.05312	9.0861	8.69048	8.34285	1.31423	0.0001541	0.0232279	0.599499	0.0220053	0.999991
chr5-621	chr5	56860972	56861122	-	181.4	0.945	promoter-TSS (XM_017593357.2)	mRNA-promoter-TSS (XM_017593357.2)	28	XM_017593357.2	Cntfr	NM_001003929	mRNA	6.81757	6.86994	7.96528	7.28209	7.05233	1.69861	0.000154205	0.0232279	0.536954	0.114771	0.999991
chr13-28	chr13	84770354	84770504	+	1298	0.959	promoter-TSS (NM_001014787.1)	mRNA-promoter-TSS (NM_001014787.1)	-18	NM_001014787.1	Igsf8	XM_017598830	mRNA	10.4509	10.2929	9.52623	10.3595	9.85319	-1.051	0.000165305	0.0244238	-0.293368	0.200389	0.999991
chr20-141	chr20	2791963	2792113	-	301.5	0.944	promoter-TSS (NM_212500.3)	mRNA-promoter-TSS (NM_212500.3)	77	NM_212500.3	Gnl1	NM_212500	mRNA	7.81652	7.52869	8.7466	8.07752	7.60045	1.45272	0.000165744	0.0244238	0.264587	0.402755	0.999991
chr4-848	chr4	178011417	178011567	+	90.4	0.942	intron (XM_039107212.1, intron 3 of 11)	mRNA-intron (NM_017253.2, intron 2 of 10)	937	XM_008763373.2	Bcat1	XM_039107212	mRNA	6.37028	6.32166	5.27367	6.13851	5.28144	-2.54748	0.000166232	0.0244238	-1.0761	0.243175	0.999991
chr3-729	chr3	113113330	113113480	-	167.7	0.999	intron (XM_039104559.1, intron 1 of 7)	mRNA-intron (XM_017591576.2, intron 1 of 8)	3278	XM_039104557.1	Galk2	NM_001013919	mRNA	7.55364	7.5612	6.50005	6.66269	6.93473	-1.74879	0.000167831	0.0244583	-1.17547	0.00016699	0.102084
chr10-184	chr10	37589083	37589233	-	674.8	0.658	promoter-TSS (NM_001025134.1)	mRNA-promoter-TSS (NM_001025134.1)	-7	NM_001025134.1	Uqcrq	XM_006246316	mRNA	8.90937	8.57807	9.73995	9.64727	8.72217	1.23571	0.000174647	0.0250444	0.65927	0.260909	0.999991
chr8-970	chr8	39891254	39891404	-	87.3	0.777	promoter-TSS (XR_086320.6)	transcript-promoter-TSS (XR_086320.6)	-660	XR_086320.6	RGD1311744	XR_086320	transcript	6.34995	6.14613	5.19227	6.5643	6.15444	-3.03089	0.000173353	0.0250444	0.23195	0.565062	0.999991
chr1-2805	chr1	250192868	250193018	+	55.6	0.996	Intergenic	Intergenic	-7054	XR_005499939.1	LOC120100146	XR_005499939	snRNA	6.01754	3.03501	3.11103	3.09953	3.10814	-22.199	0.000190172	0.0270542	-8.5596	0.0735674	0.999991
chr8-279	chr8	44811883	44812033	+	307.3	0.981	promoter-TSS (NM_001106817.1)	mRNA-promoter-TSS (NM_001106817.1)	-19	NM_001106817.1	Bcl9l	XM_039081056	mRNA	7.86263	7.49587	8.77064	7.97793	7.84628	1.46843	0.000194556	0.02746	0.323104	0.270238	0.999991
chr10-22	chr10	93287692	93287842	-	3068.4	0.993	promoter-TSS (NM_001105713.1)	mRNA-promoter-TSS (NM_001105713.1)	34	XM_017597006.2	Prkca	XM_017597006	mRNA	10.9831	10.9835	11.7696	11.8307	11.0899	0.920583	0.000199253	0.0275293	0.630385	0.0112346	0.868988
chr20-88	chr20	45764484	45764634	-	457.7	0.901	promoter-TSS (NM_001106395.1)	mRNA-promoter-TSS (NM_001106395.1)	-28	XM_039098617.1	Foxo3	XM_039098617	mRNA	8.68668	8.31414	9.51247	8.24734	7.75488	1.26638	0.000202726	0.0275293	-0.655151	0.0271469	0.999991
chr3-323	chr3	133322011	133322161	+	420.7	0.85	promoter-TSS (NM_001108595.1)	mRNA-promoter-TSS (NM_001108595.1)	22	NM_001108595.1	Naa20	NM_001108595	mRNA	8.27809	8.02934	9.15951	8.60684	8.22941	1.30829	0.000201357	0.0275293	0.372959	0.172819	0.999991
chr5-548	chr5	149918154	149918304	+	216.4	0.944	promoter-TSS (XM_017593412.2)	mRNA-promoter-TSS (XM_017593412.2)	11	XM_039110059.1	Rap1gap	XM_017593410	mRNA	7.17439	7.06573	8.20173	7.78937	7.04064	1.57207	0.000202608	0.0275293	0.545786	0.149979	0.999991
chr6-138	chr6	69134005	69134155	-	582.9	0.924	promoter-TSS (NM_001029897.3)	mRNA-promoter-TSS (NM_001029897.3)	17	XM_006240076.3	Strn3	XM_006240075	mRNA	9.07194	8.68678	9.8709	8.59661	8.001	1.21185	0.000198985	0.0275293	-0.729244	0.0133469	0.91055
chr3-409	chr3	106659316	106659466	+	330.8	0.782	promoter-TSS (NM_001108958.1)	mRNA-promoter-TSS (NM_001108958.1)	-16	NM_001108958.1	Rtf1	NM_001108958	mRNA	7.8256	7.87365	8.84609	8.11285	7.8019	1.33752	0.000208931	0.0281586	0.16529	0.555083	0.999991
chr10-48	chr10	100762440	100762590	-	1701.2	0.99	promoter-TSS (NM_001005876.1)	mRNA-promoter-TSS (NM_001005876.1)	-11	NM_001005876.1	Jpt1	NM_001005876	mRNA	10.7534	10.7138	9.93845	10.1028	10.7591	-0.974467	0.000217489	0.0281814	-0.309613	0.204706	0.999991
chr12-795	chr12	4438692	4438842	+	50.7	0.683	promoter-TSS (XM_039089918.1)	mRNA-promoter-TSS (XM_039089918.1)	-99	XM_039089919.1	LOC102548389	XM_039089916	mRNA	5.87357	5.67165	4.65511	4.17186	4.10126	-2.57684	0.000219034	0.0281814	-7.84597	1.23226e-07	0.000677972
chr1-946	chr1	252959659	252959809	+	234.2	0.244	promoter-TSS (XM_003749143.5)	mRNA-promoter-TSS (XM_003749143.5)	-2	XM_039080768.1	Shoc2	XM_039080777	mRNA	7.5865	7.08652	8.50566	7.44325	7.13957	1.6021	0.000216618	0.0281814	-0.0862647	0.806425	0.999991
chr2-724	chr2	202729595	202729745	+	122.7	0.802	promoter-TSS (XM_017590639.2)	mRNA-promoter-TSS (XM_017590639.2)	60	XM_017590639.2	Olfm3	XM_017590639	mRNA	6.19902	5.99771	7.2611	6.38902	6.2425	2.00158	0.000220106	0.0281814	0.438221	0.312585	0.999991
chr3-1108	chr3	165398232	165398382	+	90.6	0.825	intron (XM_039105553.1, intron 8 of 12)	mRNA-intron (NM_214459.3, intron 7 of 11)	-6886	XM_039106752.1	LOC120101827	XM_039106752	mRNA	6.51716	6.63923	5.51929	6.2458	5.67851	-2.31903	0.000216486	0.0281814	-1.09654	0.0118446	0.882658
chr5-145	chr5	145228187	145228337	+	681.2	0.922	promoter-TSS (NM_001134956.1)	mRNA-promoter-TSS (NM_001134956.1)	32	XM_039110398.1	Ahdc1	XM_017593517	mRNA	9.0617	8.78198	9.86651	9.26455	8.86387	1.16657	0.000217643	0.0281814	0.195741	0.435688	0.999991
chr5-28	chr5	131426308	131426458	-	1635.7	0.979	exon (XR_005504954.1, exon 2 of 2)	lnc_RNA-exon (XR_005504954.1, exon 2 of 2)	-1483	NM_001106681.1	Atp6v0b	NM_001106681	mRNA	10.2905	9.84329	11.0238	10.3032	10.6458	1.11742	0.000213713	0.0281814	0.488618	0.037086	0.999991
chr3-258	chr3	147421865	147422015	+	495.6	0.998	promoter-TSS (NM_001107796.1)	mRNA-promoter-TSS (NM_001107796.1)	-1	NM_001107796.1	Fam83d	XM_039105093	mRNA	8.9417	8.60736	7.77038	9.131	8.82497	-1.39564	0.000224871	0.0283861	0.263024	0.287676	0.999991
chr3-488	chr3	77977696	77977846	+	272.7	0.835	intron (XM_039105430.1, intron 1 of 11)	mRNA-intron (NM_001005562.2, intron 1 of 11)	15685	NM_001005562.2	Creb3l1	XM_039105430	mRNA	7.83806	8.11606	6.92074	8.08593	7.82775	-1.6461	0.000223481	0.0283861	-0.035683	0.89694	0.999991
chr10-760	chr10	82838038	82838188	+	184.8	0.891	Intergenic	Intergenic	26166	XR_005490858.1	LOC120095381	XR_005490858	snRNA	6.92413	6.73098	7.94132	7.18782	7.3391	1.69336	0.000231084	0.0289663	0.714187	0.0334809	0.999991
chr5-498	chr5	56105112	56105262	-	219.3	0.802	promoter-TSS (NM_001024784.2)	mRNA-promoter-TSS (NM_001024784.2)	-47	NM_001024784.2	Nfx1	NM_001024784	mRNA	7.04049	7.03991	8.11363	7.63485	7.11025	1.58314	0.000237374	0.0295481	0.567014	0.107043	0.999991
chr15-259	chr15	28331401	28331551	-	199.4	0.847	promoter-TSS (XM_006251930.4)	mRNA-promoter-TSS (XM_006251930.4)	35	XM_006251930.4	Homez	XM_006251930	mRNA	7.00883	6.96655	8.0633	7.49551	7.22025	1.60214	0.000246998	0.0305341	0.600508	0.0668543	0.999991
chr19-183	chr19	24487173	24487323	+	278.5	0.945	promoter-TSS (XM_017601372.2)	mRNA-promoter-TSS (XM_017601372.2)	-165	XM_039098036.1	Gipc1	XM_039098036	mRNA	8.59651	8.41731	7.53955	5.65718	5.40296	-1.28557	0.000253265	0.0310943	-4.89059	7.76599e-44	2.99092e-39
chrX-22	chrX	1527120	1527270	-	1042.8	0.952	promoter-TSS (NM_001014080.1)	mRNA-promoter-TSS (NM_001014080.1)	-21	NM_001014080.1	Uba1	XM_006256612	mRNA	9.56715	9.30147	10.3305	10.0097	9.73468	1.0827	0.0002627	0.0320333	0.54591	0.0133816	0.91055
chr3-120	chr3	154061079	154061229	-	926.1	0.884	promoter-TSS (NM_001134955.1)	mRNA-promoter-TSS (NM_001134955.1)	3	NM_001134955.1	Elmo2	NM_001134955	mRNA	9.40961	9.17075	10.1856	9.79009	9.53841	1.08981	0.000265055	0.0321021	0.4707	0.0330479	0.999991
chr12-138	chr12	10048255	10048405	-	377.5	0.979	promoter-TSS (NM_001034199.1)	mRNA-promoter-TSS (NM_001034199.1)	15	NM_001034199.1	Nptx2	NM_001034199	mRNA	8.66533	8.62813	7.70577	7.98644	8.37506	-1.31042	0.000278955	0.033371	-0.60085	0.0198589	0.999991
chr4-625	chr4	53445218	53445368	-	150.4	0.954	promoter-TSS (NM_001109480.1)	mRNA-promoter-TSS (NM_001109480.1)	34	NM_001109480.1	Tmem229a	NM_001109480	mRNA	6.38552	6.67274	7.68733	6.94931	6.77994	1.82314	0.000279255	0.033371	0.569227	0.136981	0.999991
chr7-991	chr7	8331884	8332034	+	93.5	0.716	promoter-TSS (NM_001108074.2)	mRNA-promoter-TSS (NM_001108074.2)	-41	XR_355253.4	LOC102552770	XR_355253	lnc_RNA	6.10935	5.88515	7.14452	5.80632	5.91621	1.96957	0.000284401	0.0337608	-0.290874	0.54412	0.999991
chr16-241	chr16	10005815	10005965	+	225.8	0.525	promoter-TSS (XM_006252724.4)	mRNA-promoter-TSS (XM_006252724.4)	370	XM_006252723.4	Wapl	XM_006252724	mRNA	7.57736	7.02168	8.47585	7.21332	7.13743	1.60648	0.000294682	0.0347511	-0.230955	0.515117	0.999991
chr9-149	chr9	104006638	104006788	-	431.8	0.801	promoter-TSS (NM_001277278.1)	mRNA-promoter-TSS (NM_001277278.1)	50	NM_001277278.1	Pja2	XM_017596266	mRNA	8.40454	8.01937	9.2316	8.31901	8.49129	1.30813	0.000308097	0.0358678	0.252343	0.349095	0.999991
chrX-64	chrX	1238990	1239140	-	450.2	0.96	promoter-TSS (NM_001033663.2)	mRNA-promoter-TSS (NM_001033663.2)	8	NM_022532.2	Araf	XM_039100021	mRNA	8.25006	8.32279	9.22131	8.69437	8.2895	1.2103	0.000308153	0.0358678	0.296397	0.263335	0.999991
chr2-51	chr2	51649432	51649582	+	1167.8	0.423	promoter-TSS (NM_017268.2)	mRNA-promoter-TSS (NM_017268.2)	-89	NM_017268.2	Hmgcs1	NM_017268	mRNA	9.62128	9.75646	10.5184	9.96046	9.89494	1.00417	0.000315677	0.0363954	0.294311	0.13729	0.999991
chr7-414	chr7	8150144	8150294	-	284.7	0.458	promoter-TSS (NM_019220.1)	mRNA-promoter-TSS (NM_019220.1)	54	XM_039078583.1	Tle5	XM_039078583	mRNA	7.55368	7.54683	8.55173	7.67014	7.99861	1.38984	0.000316747	0.0363954	0.433963	0.140751	0.999991
chr10-190	chr10	75458694	75458844	+	660	0.855	promoter-TSS (NM_001107038.1)	mRNA-promoter-TSS (NM_001107038.1)	20	NM_001109575.1	Cox11	NM_001109575	mRNA	8.76411	8.79961	9.66893	9.26299	9.0971	1.11317	0.000326664	0.0372958	0.514658	0.0193311	0.999991
chr10-206	chr10	10532096	10532246	+	638.5	0.765	promoter-TSS (NM_001007800.1)	mRNA-promoter-TSS (NM_001007800.1)	-14	NM_001007800.1	Glyr1	XM_039086263	mRNA	8.36018	8.83099	9.63122	9.34285	8.93114	1.2753	0.000341829	0.0385364	0.686404	0.0124746	0.891934
chr10-259	chr10	68103141	68103291	+	519.1	0.812	promoter-TSS (NM_080583.2)	mRNA-promoter-TSS (NM_080583.2)	24	NM_080583.2	Ap2b1	XM_008767936	mRNA	8.4631	8.24869	9.30518	8.72584	9.01685	1.21952	0.000340555	0.0385364	0.690647	0.00559747	0.697655
chr9-314	chr9	60930931	60931081	+	216.9	0.984	promoter-TSS (NM_001271185.1)	mRNA-promoter-TSS (NM_001271185.1)	-427	NM_001271185.1	Fzd7	NM_001271185	mRNA	5.86073	5.75519	7.10629	7.79075	8.19487	2.38201	0.00035171	0.0394025	3.66711	3.97266e-25	7.64995e-21
chr10-286	chr10	54740609	54740759	+	494.3	0.796	promoter-TSS (NM_019621.2)	mRNA-promoter-TSS (NM_019621.2)	-16	XM_006246687.4	Dlg4	XM_039085767	mRNA	7.95912	7.28163	9.82217	7.83934	8.79895	2.77011	0.000359552	0.0400309	1.01218	0.174311	0.999991
chr20-4	chr20	24515553	24515703	+	3086.5	0.877	promoter-TSS (NM_001106387.2)	mRNA-promoter-TSS (NM_001106387.2)	1	NM_001106387.2	Lrrtm3	NM_001106387	mRNA	11.176	10.7967	11.8442	11.5596	11.4159	0.988886	0.000368696	0.0407956	0.584048	0.00399642	0.625668
chr6-154	chr6	69456426	69456576	+	535.7	0.453	promoter-TSS (NM_001108981.1)	mRNA-promoter-TSS (NM_001108981.1)	-71	NM_001108981.1	Dtd2	XM_039112630	mRNA	9.25281	9.19189	8.35654	8.59711	8.59592	-1.14055	0.00037703	0.0412488	-0.806878	0.000170527	0.102617
chr9-61	chr9	94053647	94053797	+	794.5	0.59	promoter-TSS (NM_001108233.1)	mRNA-promoter-TSS (NM_001108233.1)	-4	NM_001108233.1	Farp2	XM_039083772	mRNA	8.92634	9.26704	10.0242	9.37517	9.23242	1.12626	0.000377395	0.0412488	0.246593	0.288327	0.999991
chr18-94	chr18	79634420	79634570	-	447.7	0.933	Intergenic	Intergenic	-1138	NM_001107371.1	Neto1	XM_039096766	mRNA	8.22697	8.31926	9.19838	8.78072	8.18067	1.19818	0.000382145	0.0415149	0.325259	0.2625	0.999991
chr17-246	chr17	84763255	84763405	+	236.4	0.703	promoter-TSS (NM_012563.2)	mRNA-promoter-TSS (NM_012563.2)	-300	NM_012563.2	Gad2	NM_012563	mRNA	6.95575	6.88537	7.97842	7.33976	7.55615	1.59801	0.000385515	0.0416286	0.848603	0.00835671	0.805046
chr5-448	chr5	130474874	130475024	+	263.6	0.99	intron (XR_592703.3, intron 13 of 20)	mRNA-intron (XM_008764069.3, intron 13 of 20)	3471	XM_039111517.1	Hectd3	XR_592703	transcript	7.12596	7.02079	8.10306	6.9741	7.32584	1.51296	0.000389428	0.0417994	0.1491	0.664464	0.999991
chr3-1140	chr3	152455992	152456142	+	86.2	0.832	promoter-TSS (XR_005502022.1)	lnc_RNA-promoter-TSS (XR_005502022.1)	-675	XR_005502022.1	LOC120101472	XR_005502022	lnc_RNA	6.25731	6.48309	5.3642	6.31709	5.94988	-2.50718	0.000402088	0.0427496	-0.437793	0.284811	0.999991
chr4-74	chr4	158289085	158289235	-	893.3	0.745	promoter-TSS (NM_053018.1)	mRNA-promoter-TSS (NM_053018.1)	-24	NM_053018.1	Cd9	NM_053018	mRNA	9.10598	9.16128	9.98359	9.5746	9.84489	1.04684	0.000403051	0.0427496	0.731714	0.000716969	0.265819
chr8-94	chr8	45036948	45037098	+	800.9	0.985	intron (XM_039080776.1, intron 3 of 19)	mRNA-intron (NM_001191578.1, intron 3 of 21)	1018	XM_039080769.1	Phldb1	XM_039080776	mRNA	8.67099	9.02494	9.80158	10.0868	8.95585	1.16719	0.000413624	0.043613	0.989962	0.149918	0.999991
chr4-75	chr4	116323258	116323408	-	887.3	0.973	promoter-TSS (XM_232121.8)	mRNA-promoter-TSS (XM_232121.8)	89	XM_232121.8	Paip2b	XM_232121	mRNA	9.35872	8.7926	10.1018	9.57585	9.79438	1.22621	0.000433352	0.0454259	0.735715	0.00403711	0.628495
chr7-1044	chr7	11295461	11295611	-	88.8	0.388	promoter-TSS (XM_006241072.4)	mRNA-promoter-TSS (XM_006241072.4)	60	XM_006241072.4	Brd4	NM_001100903	mRNA	5.99443	5.77203	7.00327	5.90479	5.89097	2.00148	0.000438384	0.0456862	0.0309349	0.948813	0.999991
chr20-254	chr20	7554431	7554581	+	177.9	0.285	promoter-TSS (NM_017034.1)	mRNA-promoter-TSS (NM_017034.1)	-415	NM_017034.1	Pim1	NM_017034	mRNA	6.90699	6.91487	7.94207	7.08396	7.03299	1.55555	0.000447105	0.0463258	0.244782	0.464198	0.999991
chr9-537	chr9	92749996	92750146	-	109.2	0.844	promoter-TSS (NM_053449.1)	mRNA-promoter-TSS (NM_053449.1)	50	XM_006245438.2	Hdac4	XM_039083931	mRNA	6.23687	6.09325	7.25166	6.19716	6.11932	1.84466	0.000455806	0.0469559	-0.00964167	0.982339	0.999991
chr6-142	chr6	95662067	95662217	-	574.2	0.716	promoter-TSS (NM_022210.1)	mRNA-promoter-TSS (NM_022210.1)	52	XM_006240248.4	Max	XR_005505576	transcript	8.43669	8.59656	9.42487	9.22534	8.81981	1.15319	0.00046095	0.0472145	0.674651	0.00749718	0.752354
chr10-667	chr10	3628162	3628312	-	238.8	0.252	exon (XM_008767465.3, exon 1 of 5)	mRNA-exon (XM_008767465.3, exon 1 of 5)	1080	XM_039087033.1	Shisa9	XM_039087033	mRNA	7.27991	7.3059	8.29248	7.64342	7.53874	1.43287	0.000472865	0.0481597	0.453525	0.126142	0.999991
chr1-217	chr1	144056404	144056554	+	710.5	0.967	promoter-TSS (NM_053554.2)	mRNA-promoter-TSS (NM_053554.2)	59	XM_006229684.4	Picalm	XM_006229674	mRNA	8.70617	8.92078	9.70615	9.54034	9.1585	1.10978	0.000490404	0.0493848	0.69342	0.00426834	0.636203
chr8-52	chr8	63593649	63593799	-	1109.7	0.995	promoter-TSS (XR_005488829.1)	snRNA-promoter-TSS (XR_005488829.1)	-316	XR_005488829.1	LOC120094551	XR_005488829	snRNA	10.1539	10.059	9.3177	9.72232	10.0521	-0.988577	0.000489035	0.0493848	-0.253052	0.229416	0.999991
chr1-142	chr1	203198858	203199008	-	891.3	0.958	promoter-TSS (NM_001108516.1)	mRNA-promoter-TSS (NM_001108516.1)	38	NM_001108516.1	Dpf2	XM_039083942	mRNA	9.2679	9.17736	10.0512	9.73378	9.47024	1.01727	0.000511816	0.0510425	0.48438	0.0247411	0.999991
chr9-111	chr9	16917469	16917619	-	518	0.481	promoter-TSS (NM_001012744.1)	mRNA-promoter-TSS (NM_001012744.1)	-64	NM_001012744.1	Enpp5	NM_001012744	mRNA	8.59752	8.19477	9.37626	8.60624	8.9741	1.23928	0.000512561	0.0510425	0.523468	0.0548577	0.999991
chr17-624	chr17	54302735	54302885	+	60.5	0.65	intron (XM_006254070.4, intron 2 of 2)	mRNA-intron (NM_001110860.2, intron 9 of 9)	12492	NM_001271246.1	Crem	NM_017334	mRNA	5.67771	6.12051	4.90468	5.43622	4.70804	-2.67471	0.000519	0.0511158	-1.79652	0.122302	0.999991
chr19-148	chr19	18549617	18549767	+	325.9	0.927	promoter-TSS (NM_001271381.1)	mRNA-promoter-TSS (NM_001271381.1)	-312	NM_001271381.1	Nkd1	NM_001271381	mRNA	7.7717	7.5954	8.65934	8.19902	8.15751	1.33451	0.000518102	0.0511158	0.700381	0.0084641	0.805046
chr15-275	chr15	98883962	98884112	-	187.2	0.235	promoter-TSS (NM_001105759.2)	mRNA-promoter-TSS (NM_001105759.2)	-731	XM_039093017.1	Dock9	XM_006252496	mRNA	6.75308	6.11549	5.39616	6.0061	6.31335	-2.56288	0.000523016	0.0512298	-0.562822	0.206542	0.999991
chr1-577	chr1	121549765	121549915	+	345.6	0.972	promoter-TSS (NM_052807.2)	mRNA-promoter-TSS (NM_052807.2)	1	XM_039102225.1	Igf1r	NM_052807	mRNA	7.79675	7.67934	8.69237	8.20016	7.79023	1.29932	0.000529056	0.0515398	0.390179	0.182838	0.999991
chr12-73	chr12	14845303	14845453	-	615.7	0.866	promoter-TSS (NM_145673.2)	mRNA-promoter-TSS (NM_145673.2)	-33	NM_145673.2	Mafk	NM_145673	mRNA	8.73361	8.7694	9.60916	9.3593	8.5123	1.07701	0.000533128	0.0516558	0.329838	0.281154	0.999991
chr6-215	chr6	97935970	97936120	+	405.9	0.973	promoter-TSS (NM_019168.2)	mRNA-promoter-TSS (NM_019168.2)	43	NM_019168.2	Arg2	NM_019168	mRNA	8.77553	8.52994	7.73016	8.30152	8.63134	-1.29064	0.000547063	0.052439	-0.235112	0.355651	0.999991
chr8-237	chr8	101677079	101677229	+	398.6	0.451	intron (XM_039082584.1, intron 1 of 1)	mRNA-intron (XM_039082584.1, intron 1 of 1)	549	XM_039082584.1	Msl2	XM_236567	mRNA	8.42855	8.05931	9.21019	8.14572	7.97699	1.23706	0.000544969	0.052439	-0.259574	0.345308	0.999991
chr3-797	chr3	104198615	104198765	-	146	0.926	intron (XM_039104440.1, intron 2 of 16)	mRNA-intron (NM_019211.3, intron 2 of 16)	31366	NM_019211.3	Rasgrp1	XM_039104440	mRNA	6.63237	6.46962	7.61332	7.15057	6.57387	1.69653	0.000566692	0.0540317	0.60249	0.141474	0.999991
chr1-2725	chr1	6436826	6436976	-	58.3	0.985	Intergenic	Intergenic	128547	XR_005500119.1	LOC120100351	XR_005500119	snoRNA	5.3791	4.79963	6.40534	5.12938	5.19915	2.63632	0.0005757	0.0546001	0.122692	0.863079	0.999991
chr10-99	chr10	15324600	15324750	-	1050.1	0.992	promoter-TSS (NM_001007722.2)	mRNA-promoter-TSS (NM_001007722.2)	2	NM_001007722.2	Hba-a2	NM_001007722	mRNA	9.46786	9.04693	10.1794	9.28447	10.4292	1.10633	0.000585538	0.0552409	0.880407	0.2086	0.999991
chr12-295	chr12	19639862	19640012	-	198.7	0.572	intron (XM_039089294.1, intron 5 of 6)	mRNA-intron (NM_030997.1, intron 1 of 2)	404	NM_030997.1	Vgf	XM_039089291	mRNA	7.11687	7.1861	8.14003	7.13927	7.09312	1.43789	0.000590512	0.0554185	-0.0562587	0.861372	0.999991
chr3-476	chr3	108763307	108763457	-	278.7	0.506	promoter-TSS (XM_039106829.1)	mRNA-promoter-TSS (XM_039106829.1)	-193	XM_039106835.1	Frmd5	XM_008762214	mRNA	7.69141	7.48739	8.55934	7.8563	7.7313	1.33855	0.000613652	0.0572902	0.298851	0.295622	0.999991
chr5-468	chr5	56729745	56729895	-	254.8	0.944	promoter-TSS (NM_001024342.1)	mRNA-promoter-TSS (NM_001024342.1)	29	NM_001109616.1	Fam219a	XM_006238102	mRNA	7.59562	7.18929	8.44165	7.6541	7.74586	1.4572	0.000637352	0.0591945	0.441905	0.157218	0.999991
chr14-82	chr14	34723138	34723288	-	561.6	0.795	promoter-TSS (NM_001108359.1)	mRNA-promoter-TSS (NM_001108359.1)	18	NM_001108359.1	Dcun1d4	XR_005492990	transcript	8.68661	8.67536	9.52876	8.81294	8.77594	1.07201	0.000641864	0.0593063	0.149562	0.504398	0.999991
chr9-51	chr9	14198320	14198470	+	852.3	0.751	exon (XM_228615.9, exon 1 of 7)	mRNA-exon (XM_228615.9, exon 1 of 7)	294	XR_005489036.1	Rpl7l1	XM_228615	mRNA	9.38637	9.00169	10.0915	9.71416	9.31381	1.08559	0.000665573	0.0611815	0.406438	0.103305	0.999991
chr13-63	chr13	74257852	74258002	-	674.4	0.584	promoter-TSS (NM_199403.2)	mRNA-promoter-TSS (NM_199403.2)	-31	NM_199403.2	Suco	NM_199403	mRNA	8.67359	8.7558	9.56747	9.35014	9.00166	1.07366	0.000675474	0.0617748	0.607241	0.0105198	0.852944
chr1-993	chr1	244664811	244664961	-	224	0.966	promoter-TSS (NM_001033961.1)	mRNA-promoter-TSS (NM_001033961.1)	-12	NM_020095.2	Kcnip2	XM_039088730	mRNA	7.12885	7.36174	8.25025	7.33441	7.45911	1.43461	0.000685832	0.0624037	0.224619	0.478534	0.999991
chr1-999	chr1	184850557	184850707	-	221.5	0.778	promoter-TSS (NM_001109892.1)	mRNA-promoter-TSS (NM_001109892.1)	-6	NM_001109894.1	Fgfr2	XM_039101199	mRNA	7.08118	7.27856	8.18667	7.62838	7.36164	1.45494	0.000700217	0.0630723	0.485753	0.129386	0.999991
chr20-168	chr20	10192510	10192660	-	276.3	0.725	promoter-TSS (XM_039099173.1)	mRNA-promoter-TSS (XM_039099173.1)	25	XM_039099173.1	RGD1566085	XM_039099173	mRNA	8.32266	8.00962	7.21326	7.7246	7.94535	-1.42607	0.000696888	0.0630723	-0.465019	0.0906271	0.999991
chr11-204	chr11	30978508	30978658	+	222.4	0.594	promoter-TSS (NM_001013044.1)	mRNA-promoter-TSS (NM_001013044.1)	-7	NM_019227.2	Itsn1	XM_039088249	mRNA	7.26324	6.57472	8.13294	7.01503	6.95884	1.7118	0.000708382	0.0634888	0.039631	0.921142	0.999991
chr15-56	chr15	3821859	3822009	+	641.6	0.931	promoter-TSS (XM_006251624.4)	mRNA-promoter-TSS (XM_006251624.4)	120	XM_006251625.4	Anxa7	XM_006251625	mRNA	8.7553	8.62009	9.54397	9.28815	9.18082	1.08057	0.000721724	0.0643627	0.705405	0.00133266	0.380184
chr5-320	chr5	159025809	159025959	+	361.1	0.54	promoter-TSS (NM_053464.2)	mRNA-promoter-TSS (NM_053464.2)	-35	NM_053464.2	Srm	NM_053464	mRNA	7.99617	7.97059	8.88511	8.23493	8.14074	1.20242	0.00072637	0.0644516	0.286277	0.261604	0.999991
chr6-224	chr6	87853218	87853368	+	390.6	0.923	promoter-TSS (NM_024152.2)	mRNA-promoter-TSS (NM_024152.2)	-449	NM_024152.2	Arf6	NM_024152	mRNA	8.25544	7.77117	9.02273	7.71448	7.2248	1.29423	0.000729912	0.0644516	-0.768101	0.0215947	0.999991
chr5-102	chr5	161323926	161324076	+	824.6	0.932	promoter-TSS (NM_001014071.1)	mRNA-promoter-TSS (NM_001014071.1)	-4	NM_001014071.1	Errfi1	NM_001014071	mRNA	9.05241	9.23065	9.97082	9.49333	9.44752	1.01681	0.000738116	0.0648565	0.409149	0.0535284	0.999991
chr14-20	chr14	94422226	94422376	+	1274.5	0.88	promoter-TSS (NM_031090.3)	mRNA-promoter-TSS (NM_031090.3)	-10	NM_031090.3	Rab1a	XM_039092486	mRNA	9.71639	9.68123	10.4708	10.4227	10.0714	0.930898	0.000746428	0.0652532	0.686452	0.00118197	0.350164
chr3-165	chr3	144331236	144331386	-	714.5	0.812	promoter-TSS (NM_001037352.1)	mRNA-promoter-TSS (NM_001037352.1)	-25	NM_001037352.1	Eif6	XM_006235316	mRNA	8.94859	8.8536	9.73091	9.47796	9.19927	1.03537	0.000749911	0.0652532	0.5673	0.0116858	0.879262
chr5-1274	chr5	111397920	111398070	+	62	0.989	promoter-TSS (XR_005505326.1)	snRNA-promoter-TSS (XR_005505326.1)	0	XR_005505326.1	LOC120103241	XR_005505326	snRNA	6.21191	5.8568	5.08586	5.33231	5.61464	-2.54846	0.000762114	0.0659946	-1.22219	0.009728	0.832565
chr14-5	chr14	90906044	90906194	-	2115.7	0.634	promoter-TSS (NM_001135020.1)	mRNA-promoter-TSS (NM_001135020.1)	24	NM_001135020.1	Sec61g	XM_039092466	mRNA	10.719	10.2585	11.3498	10.7659	10.9652	0.992421	0.000823065	0.07093	0.435669	0.0485509	0.999991
chr4-469	chr4	88657294	88657444	-	200.3	0.95	exon (XM_006236589.4, exon 1 of 2)	mRNA-exon (XM_006236589.4, exon 1 of 2)	234	XM_006236589.4	Gprin3	XM_002729315	mRNA	7.24598	7.01964	8.12128	7.0983	7.31827	1.44025	0.000832698	0.0714168	0.127684	0.701003	0.999991
chr3-540	chr3	55369553	55369703	+	239	0.513	promoter-TSS (NM_017007.2)	mRNA-promoter-TSS (NM_017007.2)	-76	NM_017007.2	Gad1	NM_017007	mRNA	7.16102	7.17023	8.14484	7.43517	7.97746	1.42992	0.000853547	0.0728563	0.869221	0.00943416	0.820176
chr16-109	chr16	18173137	18173287	-	450.8	0.919	promoter-TSS (XM_039094997.1)	mRNA-promoter-TSS (XM_039094997.1)	34	XM_039095004.1	Ano8	XM_039095003	mRNA	8.227	8.20517	9.08755	8.60475	8.46937	1.13971	0.000863772	0.0733797	0.435972	0.0713092	0.999991
chr2-303	chr2	92821018	92821168	+	359.8	0.767	Intergenic	Intergenic	-34464	NM_001047909.1	Mrps28	NM_001047909	mRNA	8.14504	8.01128	8.96331	8.33391	7.66105	1.16654	0.000868331	0.073419	-0.048771	0.878167	0.999991
chr11-80	chr11	30269095	30269245	-	428.9	0.9	promoter-TSS (NM_053476.3)	mRNA-promoter-TSS (NM_053476.3)	36	NM_053476.3	Synj1	XM_039088690	mRNA	8.43994	8.16252	9.19934	8.39144	8.16062	1.15565	0.0008818	0.0738702	-0.0331823	0.899754	0.999991
chr2-586	chr2	124084077	124084227	-	189.6	0.965	promoter-TSS (NM_001008374.1)	mRNA-promoter-TSS (NM_001008374.1)	3	NM_001008374.1	Pgrmc2	NM_001008374	mRNA	7.21194	6.71168	8.05845	7.21483	7.12873	1.59214	0.00088191	0.0738702	0.306102	0.398846	0.999991
chr7-773	chr7	129574020	129574170	-	135.1	0.989	intron (XM_039078920.1, intron 2 of 2)	mRNA-intron (XM_039078920.1, intron 2 of 2)	4781	NM_001000424.1	Olr1107	NM_001000424	mRNA	7.33137	7.08437	6.23028	7.032	5.96205	-1.71939	0.000887738	0.0740126	-0.963599	0.290292	0.999991
chr6-80	chr6	104926057	104926207	-	836.3	0.843	promoter-TSS (NM_001106746.2)	mRNA-promoter-TSS (NM_001106746.2)	9	XM_006240308.4	Acyp1	NM_001199168	mRNA	9.0597	9.24409	9.96962	9.60613	9.42374	1.00181	0.000899298	0.0746293	0.454716	0.0360436	0.999991
chr7-84	chr7	19185029	19185179	-	872.2	0.997	promoter-TSS (XM_006241174.4)	mRNA-promoter-TSS (XM_006241174.4)	19	XM_039079034.1	Tcp11l2	NM_001017458	mRNA	9.82268	9.71693	8.99713	9.41499	9.65013	-0.983733	0.000908017	0.0750056	-0.28577	0.169392	0.999991
chr13-264	chr13	44321829	44321979	+	175.5	0.93	promoter-TSS (NM_001177368.1)	mRNA-promoter-TSS (NM_001177368.1)	-40	NM_001177368.1	Lrrn2	NM_001177368	mRNA	7.19316	6.76116	8.03096	7.00132	6.75272	1.53108	0.000938023	0.0771287	-0.178638	0.633865	0.999991
chr1-617	chr1	151711872	151712022	+	334.3	0.655	promoter-TSS (NM_001009290.1)	mRNA-promoter-TSS (NM_001009290.1)	-18	NM_001009290.1	Ndufc2	NM_001009290	mRNA	8.02471	7.76343	8.81396	7.97569	8.08813	1.22822	0.00100435	0.0810948	0.192552	0.48087	0.999991
chr17-220	chr17	54224099	54224249	-	259	0.85	Intergenic	Intergenic	7782	XR_005495655.1	LOC120097845	XR_005495655	lnc_RNA	7.42244	7.40794	8.35176	7.98942	7.59549	1.3268	0.00100343	0.0810948	0.580997	0.0571752	0.999991
chr19-110	chr19	51457108	51457258	+	430.9	0.975	promoter-TSS (NM_139254.2)	mRNA-promoter-TSS (NM_139254.2)	-4	NM_139254.2	Tubb3	NM_139254	mRNA	7.98429	8.13067	8.9545	8.48781	8.77575	1.18207	0.00099653	0.0810948	0.784331	0.00232067	0.477947
chr5-645	chr5	19303619	19303769	+	171.7	0.659	promoter-TSS (NM_001107905.1)	mRNA-promoter-TSS (NM_001107905.1)	12	NM_001107905.1	Ubxn2b	XR_005504427	transcript	7.07927	6.82081	7.9431	6.90464	6.91512	1.4792	0.001003	0.0810948	-0.0701906	0.840788	0.999991
chr5-533	chr5	153753504	153753654	+	222.7	0.946	promoter-TSS (NM_001012105.1)	mRNA-promoter-TSS (NM_001012105.1)	58	XM_039110080.1	Zbtb17	XM_039110080	mRNA	7.85119	7.68656	6.83178	7.40302	7.79118	-1.49005	0.00102009	0.0819957	-0.225535	0.447363	0.999991
chr14-247	chr14	57004338	57004488	-	231.3	0.484	promoter-TSS (NM_001105750.2)	mRNA-promoter-TSS (NM_001105750.2)	-8	XM_039091560.1	Stim2	XM_039091561	mRNA	7.00641	6.81139	7.89081	7.09178	6.72492	1.47796	0.00102982	0.0824087	0.0208564	0.954658	0.999991
chr1-1819	chr1	77486848	77486998	-	108.3	0.868	promoter-TSS (XM_006228414.4)	mRNA-promoter-TSS (XM_006228414.4)	25	XM_006228414.4	Fkrp	XM_006228414	mRNA	5.86658	6.19019	7.13072	6.65832	6.19181	1.92947	0.00106269	0.0842866	0.801819	0.0884375	0.999991
chr9-176	chr9	75820718	75820868	+	364.9	0.393	promoter-TSS (NM_001106919.1)	mRNA-promoter-TSS (NM_001106919.1)	-3	NM_001106919.1	Arpc2	XM_006245165	mRNA	7.90162	7.99622	8.83425	8.19035	8.14177	1.18258	0.00105816	0.0842866	0.300554	0.242673	0.999991
chr2-60	chr2	216309036	216309186	+	1035.5	0.663	promoter-TSS (NM_001191850.1)	mRNA-promoter-TSS (NM_001191850.1)	-91	XM_039102717.1	Ap1ar	XM_039102719	mRNA	9.10711	9.52456	10.1958	10.0711	9.78171	1.05049	0.00107549	0.084553	0.742011	0.00187136	0.449812
chr9-23	chr9	39767014	39767164	+	1251.7	0.99	promoter-TSS (NM_001012225.2)	mRNA-promoter-TSS (NM_001012225.2)	-143	XM_006244840.4	Mgat4a	XM_017596573	mRNA	10.098	10.0069	9.30709	10.2957	10.3496	-0.93648	0.00107257	0.084553	0.329047	0.0786221	0.999991
chr12-77	chr12	32175588	32175738	+	601.3	0.979	exon (NM_001389247.1, exon 1 of 32)	mRNA-exon (NM_001389247.1, exon 1 of 32)	355	NM_001389248.1	Sbno1	XM_039089440	mRNA	8.74802	8.75511	9.56067	9.07914	8.83657	1.01925	0.00109352	0.0855954	0.274964	0.231016	0.999991
chr18-55	chr18	64134186	64134336	-	638.9	0.945	promoter-TSS (NM_001106137.1)	mRNA-promoter-TSS (NM_001106137.1)	-64	XM_017600888.2	Poli	XM_039096650	mRNA	8.84074	8.88902	9.66578	9.21583	8.78914	1.00118	0.00110706	0.0862782	0.199717	0.417275	0.999991
chr5-52	chr5	144504318	144504468	+	1161.6	0.986	promoter-TSS (XR_005505020.1)	lnc_RNA-promoter-TSS (XR_005505020.1)	13	XR_005505020.1	LOC120102992	XR_005505021	lnc_RNA	9.49327	9.81612	10.4709	10.0698	9.79269	0.970127	0.00111837	0.0867826	0.334703	0.136591	0.999991
chr13-209	chr13	83773304	83773454	+	224.6	0.589	promoter-TSS (NM_001082580.1)	mRNA-promoter-TSS (NM_001082580.1)	-3	NM_001109476.1	Pfdn2	NM_001109476	mRNA	7.13905	7.29285	8.17412	7.66615	7.40603	1.38588	0.00113213	0.0872146	0.493756	0.115841	0.999991
chr3-1164	chr3	78561922	78562072	-	82.4	0.885	promoter-TSS (XR_005502286.1)	lnc_RNA-promoter-TSS (XR_005502286.1)	-195	XR_005502287.1	LOC120101598	XR_005502286	lnc_RNA	6.29546	6.25695	5.35269	6.37318	5.94537	-2.35137	0.00113367	0.0872146	-0.186683	0.651976	0.999991
chr1-686	chr1	56463278	56463428	+	309.1	0.191	promoter-TSS (NM_001004198.1)	mRNA-promoter-TSS (NM_001004198.1)	23	XM_006227980.4	Tbp	NM_001004198	mRNA	7.62517	7.7352	8.58852	8.20049	7.90148	1.24559	0.00117651	0.0895635	0.537537	0.0564537	0.999991
chr17-372	chr17	83767231	83767381	-	137.6	0.58	Intergenic	Intergenic	-7279	XM_039096347.1	RGD1566369	XM_039096347	mRNA	6.89683	7.20885	6.08159	7.22524	6.09508	-1.80978	0.00117919	0.0895635	-0.427578	0.64434	0.999991
chr1-831	chr1	231129308	231129458	+	263.2	0.944	intron (XR_005489056.1, intron 4 of 6)	mRNA-intron (NM_001014167.1, intron 4 of 7)	30925	XR_005500126.1	LOC120100359	XR_005500126	snoRNA	7.44558	7.3649	8.33601	8.04905	7.69333	1.32127	0.00117259	0.0895635	0.705131	0.0184534	0.999571
chr20-13	chr20	27894027	27894177	-	1684.4	0.95	promoter-TSS (NM_080906.2)	mRNA-promoter-TSS (NM_080906.2)	-14	NM_080906.2	Ddit4	NM_080906	mRNA	10.6901	10.1132	11.3002	10.2926	9.88688	1.021	0.00119825	0.0903964	-0.395346	0.119165	0.999991
chr4-205	chr4	179634173	179634323	+	449.3	0.499	promoter-TSS (NM_001083336.2)	mRNA-promoter-TSS (NM_001083336.2)	-27	NM_001083336.2	Stk38l	XM_039108393	mRNA	8.33338	8.09162	9.08907	8.5576	8.25261	1.14004	0.00120024	0.0903964	0.269267	0.309989	0.999991
chr14-25	chr14	2187532	2187682	+	1129.6	0.875	promoter-TSS (NM_001013987.1)	mRNA-promoter-TSS (NM_001013987.1)	-7	XM_039091657.1	Glmn	XR_005492903	transcript	9.46416	9.60822	10.3023	10.2357	9.85238	0.925439	0.00121411	0.0910581	0.639915	0.00396094	0.625195
chr13-146	chr13	83793210	83793360	-	327.9	0.377	promoter-TSS (NM_001108350.1)	mRNA-promoter-TSS (NM_001108350.1)	69	NM_001108350.1	Klhdc9	NM_001108350	mRNA	7.77807	7.77856	8.66559	8.3276	7.9442	1.20795	0.00123563	0.0922865	0.524861	0.0633007	0.999991
chr10-761	chr10	87146977	87147127	+	201.8	0.971	promoter-TSS (NM_176077.3)	mRNA-promoter-TSS (NM_176077.3)	65	NM_176077.3	G6pc3	NM_176077	mRNA	6.97594	6.87393	7.90094	7.52724	7.57351	1.48345	0.0012482	0.0924548	0.987907	0.0014042	0.386285
chr1-298	chr1	95333867	95334017	-	584.2	0.963	promoter-TSS (NM_001106258.2)	mRNA-promoter-TSS (NM_001106258.2)	-145	XM_039104852.1	Akt1s1	XM_008759335	mRNA	9.37569	9.09732	8.4202	8.83256	9.02317	-1.08231	0.00124797	0.0924548	-0.394976	0.0847569	0.999991
chr1-220	chr1	183102790	183102940	+	705.2	0.916	promoter-TSS (NM_001011936.1)	mRNA-promoter-TSS (NM_001011936.1)	-173	NM_001011936.1	Bag3	NM_001011936	mRNA	9.51405	9.20407	8.54627	9.36688	9.41697	-1.07057	0.00134228	0.0972077	0.0332326	0.87919	0.999991
chr12-79	chr12	33487121	33487271	-	588	0.972	promoter-TSS (NM_001271309.1)	mRNA-promoter-TSS (NM_001271309.1)	56	XR_005491673.1	Tmem120b	NM_001271309	mRNA	8.67836	8.60162	9.45036	9.30279	8.74919	1.02733	0.00133276	0.0972077	0.540082	0.0416431	0.999991
chr13-65	chr13	76807380	76807530	-	688.8	0.992	promoter-TSS (NM_013113.2)	mRNA-promoter-TSS (NM_013113.2)	-359	NM_013113.2	Atp1b1	NM_013113	mRNA	8.83722	8.90942	9.66576	9.30984	9.21047	0.99008	0.001343	0.0972077	0.494527	0.0213541	0.999991
chr16-120	chr16	18527679	18527829	-	422.5	0.912	promoter-TSS (NM_001106070.1)	mRNA-promoter-TSS (NM_001106070.1)	8	NM_001106070.1	Map1s	NM_001106070	mRNA	8.30701	8.17541	9.08621	8.60145	8.24796	1.10214	0.00133168	0.0972077	0.26477	0.314072	0.999991
chr18-295	chr18	50389439	50389589	+	151.5	0.571	promoter-TSS (NM_001007759.1)	mRNA-promoter-TSS (NM_001007759.1)	-171	XM_006254749.4	Marchf3	XM_006254749	mRNA	6.83719	6.44693	7.68668	6.95099	7.02914	1.62702	0.00134257	0.0972077	0.578141	0.121021	0.999991
chr5-551	chr5	58245399	58245549	+	214.7	0.918	promoter-TSS (NM_031974.1)	mRNA-promoter-TSS (NM_031974.1)	-1	NM_031974.1	Clta	XM_006238106	mRNA	7.29029	7.13055	8.14669	7.15489	7.60657	1.35886	0.00134491	0.0972077	0.301122	0.375787	0.999991
chr3-242	chr3	117847637	117847787	-	514.6	0.844	promoter-TSS (NM_001033997.1)	mRNA-promoter-TSS (NM_001033997.1)	-1	NM_001033997.1	Ubox5	NM_001033997	mRNA	8.49577	8.40938	9.27723	9.05899	8.59116	1.05901	0.00135995	0.0978998	0.519191	0.0470073	0.999991
chr1-255	chr1	170683508	170683658	+	652.9	0.921	promoter-TSS (NM_001108500.1)	mRNA-promoter-TSS (NM_001108500.1)	-111	NM_001108500.1	Pik3c2a	NM_001108500	mRNA	8.88331	8.75613	9.61906	9.44396	8.86128	1.0013	0.00137297	0.0980494	0.469505	0.0767981	0.999991
chr19-503	chr19	23959521	23959671	-	75.1	0.988	Intergenic	Intergenic	-4525	NR_031825.1	Mir23a	unassigned_transcript_1619	miRNA	5.55747	5.58475	6.59355	6.14265	5.56665	2.05348	0.00136824	0.0980494	0.759131	0.168153	0.999991
chr1-1614	chr1	151650027	151650177	+	127.8	0.648	promoter-TSS (XM_006229781.4)	mRNA-promoter-TSS (XM_006229781.4)	28	XM_006229781.4	Kctd21	NM_001109151	mRNA	6.24939	6.35575	7.3109	6.77838	6.77085	1.71632	0.0013959	0.0990349	0.863704	0.0230684	0.999991
chr20-167	chr20	13596856	13597006	-	279.6	0.619	promoter-TSS (XM_039099171.1)	mRNA-promoter-TSS (XM_039099171.1)	-434	XM_039099171.1	Bcr	XM_039099171	mRNA	7.56277	7.62238	8.48601	7.87885	7.78852	1.24071	0.00140318	0.0990349	0.351181	0.205759	0.999991
chr8-747	chr8	10631812	10631962	+	122.1	0.922	exon (XM_006242522.3, exon 1 of 16)	mRNA-exon (XM_006242522.3, exon 1 of 16)	135	XM_006242522.3	Mtmr2	XM_039081339	mRNA	6.18416	6.20597	5.29864	5.64899	5.709	-2.21002	0.00140334	0.0990349	-1.08214	0.00897271	0.810476
chr14-497	chr14	80517859	80518009	+	101.2	0.985	intron (XR_005493389.1, intron 21 of 25)	mRNA-intron (XM_008770390.3, intron 21 of 32)	50502	XM_008770393.3	Ankrd36	XM_008770391	mRNA	6.19979	5.81343	7.08332	6.42457	6.26062	1.90163	0.00141714	0.0996167	0.663922	0.144422	0.999991
chr5-905	chr5	146044713	146044863	-	95.7	0.626	Intergenic	Intergenic	-7470	XR_005505035.1	LOC120103000	XR_005505036	lnc_RNA	6.83336	6.72045	5.90457	6.0326	5.86339	-1.67986	0.00261381	0.139858	-1.5541	3.81394e-05	0.0419675
chr12-345	chr12	43245290	43245440	-	170.1	0.51	Intergenic	Intergenic	10202	XR_001840721.2	LOC108352468	XR_001840721	lnc_RNA	7.83676	7.44832	6.77162	6.53188	6.84285	-1.39557	0.00275489	0.145668	-1.50134	9.21519e-06	0.0136502
chr20-5	chr20	3870643	3870793	+	2936.6	0.998	promoter-TSS (NM_001329896.1)	mRNA-promoter-TSS (NM_001329896.1)	-47	NM_001329896.1	LOC108348108	NM_001329896	mRNA	10.8141	10.8885	11.4829	11.5141	11.5887	0.739878	0.00337764	0.163192	0.833049	2.27889e-06	0.00487595
chr10-35	chr10	39538108	39538258	-	1960.9	0.587	promoter-TSS (NM_012656.2)	mRNA-promoter-TSS (NM_012656.2)	-34	NM_012656.2	Sparc	NM_012656	mRNA	10.3849	9.93448	10.8367	10.7034	11.2931	0.782306	0.0101263	0.287207	1.02868	5.56059e-05	0.0535387
chr3-584	chr3	89005105	89005255	+	214.2	0.997	promoter-TSS (NM_001035233.1)	mRNA-promoter-TSS (NM_001035233.1)	51	NM_017215.2	Slc1a2	NM_001035233	mRNA	6.63813	6.859	7.58378	7.27656	8.1394	1.29781	0.0116464	0.308818	1.60136	4.82891e-05	0.048941
chr1-245	chr1	254785976	254786126	+	664.2	0.937	promoter-TSS (NM_001191052.2)	mRNA-promoter-TSS (NM_001191052.2)	-40	NM_001191052.2	Tcf7l2	NM_001191052	mRNA	8.49949	8.80352	9.33966	9.61667	9.18663	0.857417	0.0124019	0.315774	0.96752	0.000146835	0.0951
chr11-185	chr11	43417178	43417328	+	260.5	0.722	promoter-TSS (NM_212519.2)	mRNA-promoter-TSS (NM_212519.2)	-87	XM_008768645.3	Tomm70	XM_008768645	mRNA	7.2779	7.33513	8.03679	8.08426	7.98711	1.06177	0.0146859	0.347289	1.07036	0.000109641	0.0841907
chr1-66	chr1	78961380	78961530	-	1360.9	0.988	promoter-TSS (NM_001256509.1)	mRNA-promoter-TSS (NM_001256509.1)	37	XM_039101873.1	Fosb	XM_039101873	mRNA	9.78415	9.67292	10.2506	10.7789	10.2194	0.627162	0.0263139	0.423409	0.974931	3.61974e-05	0.0410021
chr4-37	chr4	167737904	167738054	+	1449.6	0.617	promoter-TSS (XM_006237522.4)	mRNA-promoter-TSS (XM_006237522.4)	-544	XM_006237522.4	Gpr19	XM_039107696	mRNA	9.92181	9.82051	10.3396	10.8326	10.3085	0.559671	0.0439902	0.518085	0.881155	0.000125186	0.0876597
chr4-277	chr4	151630185	151630335	+	346.9	0.841	promoter-TSS (XM_039108791.1)	mRNA-promoter-TSS (XM_039108791.1)	-11	XM_039108792.1	Zfp248	XM_039108795	mRNA	7.80921	7.96123	7.29675	8.79321	8.4365	-0.888144	0.0441193	0.518923	1.0006	0.000136446	0.0926646
chr14-97	chr14	95254426	95254576	+	506	0.954	promoter-TSS (NM_001100565.1)	mRNA-promoter-TSS (NM_001100565.1)	-159	NM_001100565.1	Peli1	XM_039092073	mRNA	9.35463	9.06576	8.76188	8.37084	7.94976	-0.594412	0.0689946	0.613152	-1.35939	1.81139e-07	0.000799765
chr19-59	chr19	13760940	13761090	+	691.9	0.545	intron (XM_039098345.1, intron 1 of 6)	mRNA-intron (XM_039098341.1, intron 1 of 5)	2132	XM_039098345.1	LOC108353188	XM_039098341	mRNA	9.54953	9.62213	9.17943	8.69896	8.75778	-0.521845	0.0768193	0.629734	-1.08879	1.86895e-07	0.000799765
chr19-471	chr19	23492076	23492226	-	83.1	0.976	Intergenic	Intergenic	-2400	NM_001009541.1	Ier2	NM_001009541	mRNA	6.80093	6.29197	6.06102	5.64547	5.4462	-0.94949	0.110335	0.699032	-2.11901	3.59552e-06	0.00720853
chr4-80	chr4	169709711	169709861	-	869.3	0.994	Intergenic	Intergenic	-7035	XM_039108225.1	LOC500354	XM_006237568	mRNA	9.83379	9.88771	9.51685	9.18179	9.1802	-0.437159	0.123521	0.711316	-0.847579	1.97194e-05	0.0253151
chr6-460	chr6	46012250	46012400	+	174.8	0.912	Intergenic	Intergenic	-79027	XR_354725.3	LOC102554981	XR_354725	lnc_RNA	7.59636	7.52649	7.15005	6.79181	6.86814	-0.643243	0.140086	0.741012	-1.15692	0.000150171	0.0951
chr1-140	chr1	181152479	181152629	-	894.6	0.573	promoter-TSS (NM_001100662.1)	mRNA-promoter-TSS (NM_001100662.1)	-65	NM_001100662.1	Eif3c	NM_001100662	mRNA	9.01652	9.23643	9.45888	9.84339	9.86713	0.400676	0.20834	0.820698	0.90186	1.58177e-05	0.0210064
chr1-1423	chr1	183264751	183264901	-	151.3	0.843	intron (XM_039078492.1, intron 2 of 5)	mRNA-intron (NM_001107554.1, intron 16 of 19)	2039	XM_039078492.1	Inpp5f	XM_039078467	mRNA	7.4835	7.24069	7.04094	6.6746	6.51119	-0.522899	0.257825	0.852302	-1.2738	0.000140676	0.0934114
chr15-207	chr15	75760117	75760267	-	240.4	0.865	Intergenic	Intergenic	37397	XR_005494197.1	Mzt1	XR_005494197	transcript	8.03043	8.03635	7.7375	7.15452	7.18637	-0.43121	0.261923	0.853393	-1.27566	3.74343e-06	0.00720853
chr16-80	chr16	6116846	6116996	-	547.4	0.979	promoter-TSS (NM_017351.1)	mRNA-promoter-TSS (NM_017351.1)	3	NM_017351.1	Itih3	XM_039094780	mRNA	7.70575	7.70681	8.03565	8.9673	9.78343	0.447607	0.294079	0.869207	2.2726	6.10782e-14	7.84102e-10
chr7-899	chr7	110912295	110912445	+	109	0.998	promoter-TSS (NM_001130573.1)	mRNA-promoter-TSS (NM_001130573.1)	-129	NM_001130573.1	Maff	XM_006242029	mRNA	6.10736	5.99132	6.39366	6.7447	6.93113	0.691164	0.313665	0.876163	1.49436	8.05833e-05	0.0689667
chr19-283	chr19	22880290	22880440	+	175.2	0.833	exon (XM_039098178.1, exon 2 of 2)	mRNA-exon (XM_039098178.1, exon 2 of 2)	1455	XM_039098178.1	LOC120098580	XM_039098178	mRNA	7.51572	7.57782	7.29008	6.91923	6.54379	-0.400483	0.34998	0.892043	-1.28213	0.000114082	0.0841907
chr1-41	chr1	93851845	93851995	+	1743.3	0.999	promoter-TSS (NM_001004220.1)	mRNA-promoter-TSS (NM_001004220.1)	12	NM_001004220.1	Etfb	NM_001004220	mRNA	10.2113	10.279	10.4468	10.8871	10.7741	0.232531	0.38765	0.907079	0.705814	0.000124477	0.0876597
chr3-200	chr3	15725815	15725965	-	619.2	0.329	promoter-TSS (XM_006233933.4)	mRNA-promoter-TSS (XM_006233933.4)	-158	XM_006233934.4	Slc25a25	XM_006233931	mRNA	8.79779	8.50027	8.89831	9.49596	9.33535	0.304392	0.390447	0.908718	0.978185	2.05294e-05	0.0255048
chr10-778	chr10	84240868	84241018	+	200.1	0.881	Intergenic	Intergenic	-3644	NM_001004131.1	Krt24	NM_001004131	mRNA	7.86263	7.64578	7.52805	6.98783	6.94274	-0.348009	0.403269	0.913608	-1.21747	4.96842e-05	0.0490638
chr3-25	chr3	146226374	146226524	+	3356.6	0.996	promoter-TSS (NM_001270867.1)	mRNA-promoter-TSS (NM_001270867.1)	42	NM_053601.2	Nnat	XM_008762390	mRNA	11.181	10.9212	11.2468	11.6419	12.0706	0.215105	0.419577	0.923084	0.968735	6.30061e-06	0.0105502
chr3-383	chr3	147421212	147421362	-	357.3	0.994	promoter-TSS (NM_001107796.1)	mRNA-promoter-TSS (NM_001107796.1)	-654	NM_001107796.1	Fam83d	XM_039105093	mRNA	7.99384	7.64025	7.66326	8.86787	8.53325	-0.249712	0.576983	0.954692	1.20358	1.04459e-05	0.0149001
chr20-49	chr20	12766937	12767087	-	696.8	0.816	promoter-TSS (NM_001109577.1)	mRNA-promoter-TSS (NM_001109577.1)	15	NM_001109577.1	Derl3	XM_008773838	mRNA	8.53091	8.95084	8.90702	9.73242	9.46822	0.178127	0.6275	0.96352	1.0704	1.38283e-05	0.0190203
chr10-2205	chr10	1187339	1187489	-	38.8	0.943	intron (XM_039087012.1, intron 4 of 16)	mRNA-intron (XM_039087007.1, intron 4 of 17)	-24144	XM_039087011.1	Mrtfb	XM_039087011	mRNA	5.22049	5.20192	5.23905	4.34891	4.36122	0.0545533	0.939452	1	-3.57308	1.11171e-06	0.00285434
chr11-586	chr11	29980969	29981119	-	53.2	0.834	promoter-TSS (NM_001127523.2)	mRNA-promoter-TSS (NM_001127523.2)	14	NM_001127523.2	Mis18a	NM_001127523	mRNA	4.43758	4.51236	4.34499	5.9947	5.4884	-1.06685	0.579423	1	3.50409	2.6808e-09	2.06491e-05
chr12-913	chr12	46576618	46576768	-	39.9	0.211	intron (XR_005491652.1, intron 3 of 8)	mRNA-intron (NM_001135840.1, intron 3 of 9)	-1619	XM_017598571.2	Zfp605	XM_017598571	mRNA	5.69242	5.15701	4.19976	4.49331	4.40945	-5.28269	2.88235e-05	1	-2.81321	2.06697e-06	0.00468266
chr13-597	chr13	31750835	31750985	+	55.2	0.876	promoter-TSS (XM_001056699.7)	mRNA-promoter-TSS (XM_001056699.7)	18	XM_001056699.7	En1	XM_001056699	mRNA	4.57783	4.95115	4.83046	5.52625	5.95661	0.202055	0.886134	1	2.56755	2.52037e-05	0.0303334
chr13-787	chr13	49285609	49285759	-	33	0.957	Intergenic	Intergenic	-131920	XR_005492483.1	LOC108352541	XR_005492486	lnc_RNA	4.25986	4.2711	3.9805	4.97603	4.98976	-5.84454	0.0320986	1	2.37807	0.000101804	0.0834204
chr1-3971	chr1	196036260	196036410	-	29.5	0.993	Intergenic	Intergenic	-1941	XR_005494647.1	Pgghg	XM_006230587	mRNA	3.53446	3.48802	3.51417	4.36533	4.66545	NA	1	1	8.17872	2.10434e-07	0.000810443
chr14-1031	chr14	61622392	61622542	+	28.6	0.682	exon (XM_017599088.2, exon 1 of 8)	mRNA-exon (XM_017599088.2, exon 1 of 8)	4749	XM_017599088.2	Kcnip4	NM_181365	mRNA	3.79275	3.81889	4.05056	4.05849	4.92739	1.88015	0.325595	1	3.62448	0.00011586	0.0841907
chr1-4441	chr1	154115804	154115954	+	23.3	0.692	Intergenic	Intergenic	-25651	XM_039101101.1	LOC102553078	XM_039101101	mRNA	4.58734	4.47114	3.60371	3.65941	3.66343	-8.05182	0.000279224	1	-4.47853	4.43671e-07	0.00142393
chr1-4465	chr1	154115715	154115865	-	23.5	0.639	Intergenic	Intergenic	-25740	XM_039101101.1	LOC102553078	XM_039101101	mRNA	4.40317	4.53065	3.67891	3.67229	3.59626	-3.91238	0.00118801	1	-4.66691	1.22276e-06	0.00294325
chr16-658	chr16	7711982	7712132	-	53.2	0.95	exon (NM_001170593.1, exon 2 of 27)	mRNA-exon (NM_001170593.1, exon 2 of 27)	4434	NM_031663.2	Slc18a3	NM_031663	mRNA	4.966	4.69365	5.40193	5.375	5.92762	1.80507	0.0906217	1	2.46597	7.38134e-05	0.0646085
chr16-675	chr16	79516688	79516838	+	51.4	0.367	promoter-TSS (NM_001271072.1)	mRNA-promoter-TSS (NM_001271072.1)	-51	NM_001271072.1	Abhd13	NM_001271072	mRNA	4.66162	4.95768	5.19343	5.44437	5.80399	1.29905	0.273417	1	2.32447	0.000155893	0.0968374
chr19-387	chr19	37573360	37573510	+	107.4	0.902	promoter-TSS (NM_001008553.2)	mRNA-promoter-TSS (NM_001008553.2)	-108	XR_005496685.1	Dhodh	NM_001008553	mRNA	5.42639	5.78086	6.53636	6.84981	6.32599	1.92019	0.0114787	1	2.05347	2.87447e-05	0.0335468
chr3-1910	chr3	147026700	147026850	+	38.3	0.908	Intergenic	Intergenic	-4636	NM_001258011.1	Snhg11	NM_001258011	mRNA	5.21094	5.24956	3.79784	3.79102	3.79864	-8.76439	4.66485e-05	1	-7.51064	5.35248e-07	0.00158569
chr4-1140	chr4	78556860	78557010	-	61.6	0.957	Intergenic	Intergenic	43115	XR_005503556.1	LOC120102267	XR_005503556	lnc_RNA	5.22008	4.70509	5.67515	5.62205	6.14846	1.93052	0.071694	1	2.4629	0.000137145	0.0926646
chr5-2394	chr5	118248273	118248423	-	21	0.958	Intergenic	Intergenic	-144605	XM_039109333.1	Dab1	XM_039109337	mRNA	4.9271	3.0419	3.20584	3.11504	3.08955	-4.21732	0.445911	1	-5.97351	8.4201e-05	0.0704963
chr6-1500	chr6	128705143	128705293	+	29	0.985	intron (XR_005506276.1, intron 90 of 94)	lnc_RNA-intron (XR_005506256.1, intron 89 of 94)	-16822	NR_032124.1	Mir379	unassigned_transcript_655	miRNA	5.2598	4.44376	4.67073	4.10532	4.16737	-0.699509	0.465813	1	-3.22452	0.000111597	0.0841907
chr9-1720	chr9	60787296	60787446	+	17.5	0.65	intron (XM_039084847.1, intron 12 of 13)	mRNA-intron (XM_039084845.1, intron 12 of 13)	76584	XM_039084848.1	Cdk15	XM_039084845	mRNA	3.29129	3.28504	3.33706	4.07893	3.86655	2.15029	0.675628	1	6.17536	6.87661e-05	0.0615905
chr9-501	chr9	113866664	113866814	+	123.4	0.941	promoter-TSS (XR_005489527.1)	transcript-promoter-TSS (XR_005489527.1)	59	XR_005489527.1	LOC102550397	XM_039084954	mRNA	5.56858	6.1966	6.1598	6.96333	7.16909	0.486368	0.570046	1	2.04639	4.25485e-06	0.00780318
chr9-869	chr9	11698800	11698950	+	53.2	0.647	Intergenic	Intergenic	9582	XR_005489615.1	LOC120094938	XR_005489615	snRNA	5.0768	4.8885	5.13821	5.7811	5.77917	0.52133	0.638815	1	2.1194	4.03263e-05	0.0431413
